# Supplementary material for: Chiral olefin–sulfoxide as ligands for rhodium-catalyzed asymmetric conjugate addition of arylboronic acids to unsaturated esters
Source: Royal Society of Chemistry journal article supplement (doi:10.1039/c3ob41342j), 2013-01-01

Supporting Information:

**Chiral Olefin–Sulfoxide as Ligands for  
Rhodium-Catalyzed Asymmetric Conjugate Addition of  
Arylboronic Acids to Unsaturated Esters**

**Feng Xue<sup>a,b</sup>, Dongping Wang<sup>a</sup>, Xincheng Li<sup>a</sup>, Boshun Wan<sup>\*a</sup>**

*<sup>a</sup>Dalian Institute of Chemical Physics, Chinese Academy of Sciences, 457 Zhongshan Road, Dalian, 116023, P. R. China. E-mail: [bswan@dicp.ac.cn](mailto:bswan@dicp.ac.cn)*

*<sup>b</sup>College of Chemistry and Chemical Engineering, Henan Institute of Science and Technology, Xixiang Henan, 453002, P. R. China.*

**Table of Contents**

|                                                                          |              |
|--------------------------------------------------------------------------|--------------|
| <b>1. Copy of NMR for the Compounds (6a-6q).....</b>                     | <b>2–35</b>  |
| <b>2. Copy of HRMS for the Compounds (6a-6q).....</b>                    | <b>36–52</b> |
| <b>3. Copy of HPLC for the Racemic and Chiral Compounds (6a-6q).....</b> | <b>53–69</b> |

### 1. Copy of NMR for the compounds (6a-6q)

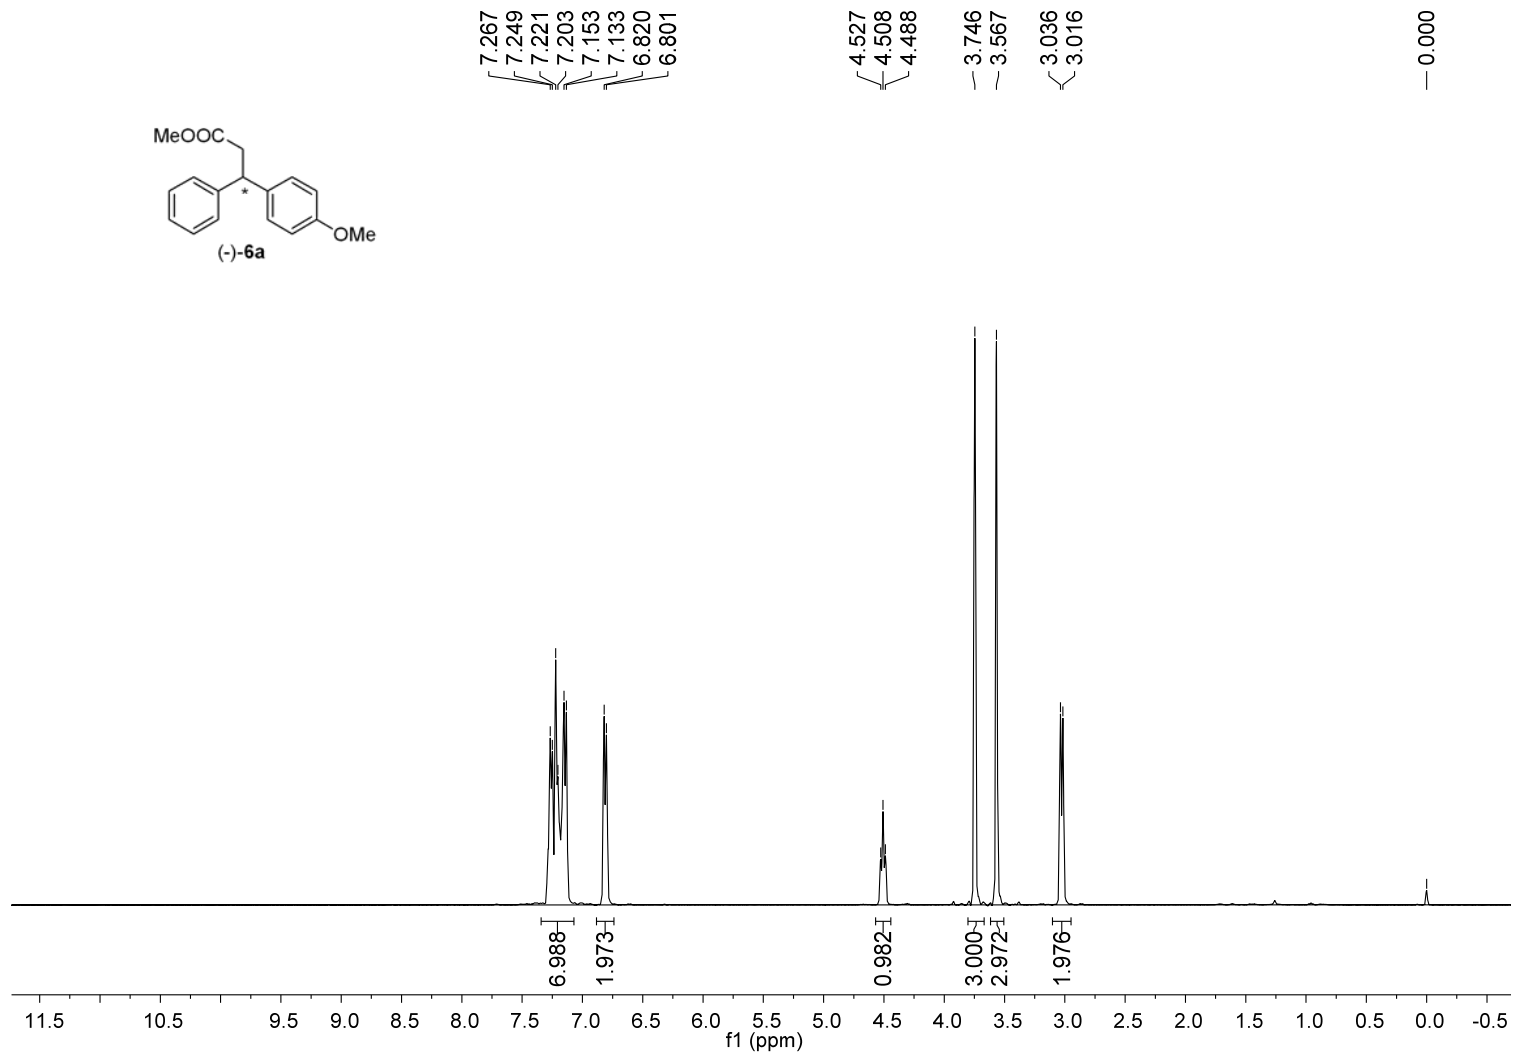

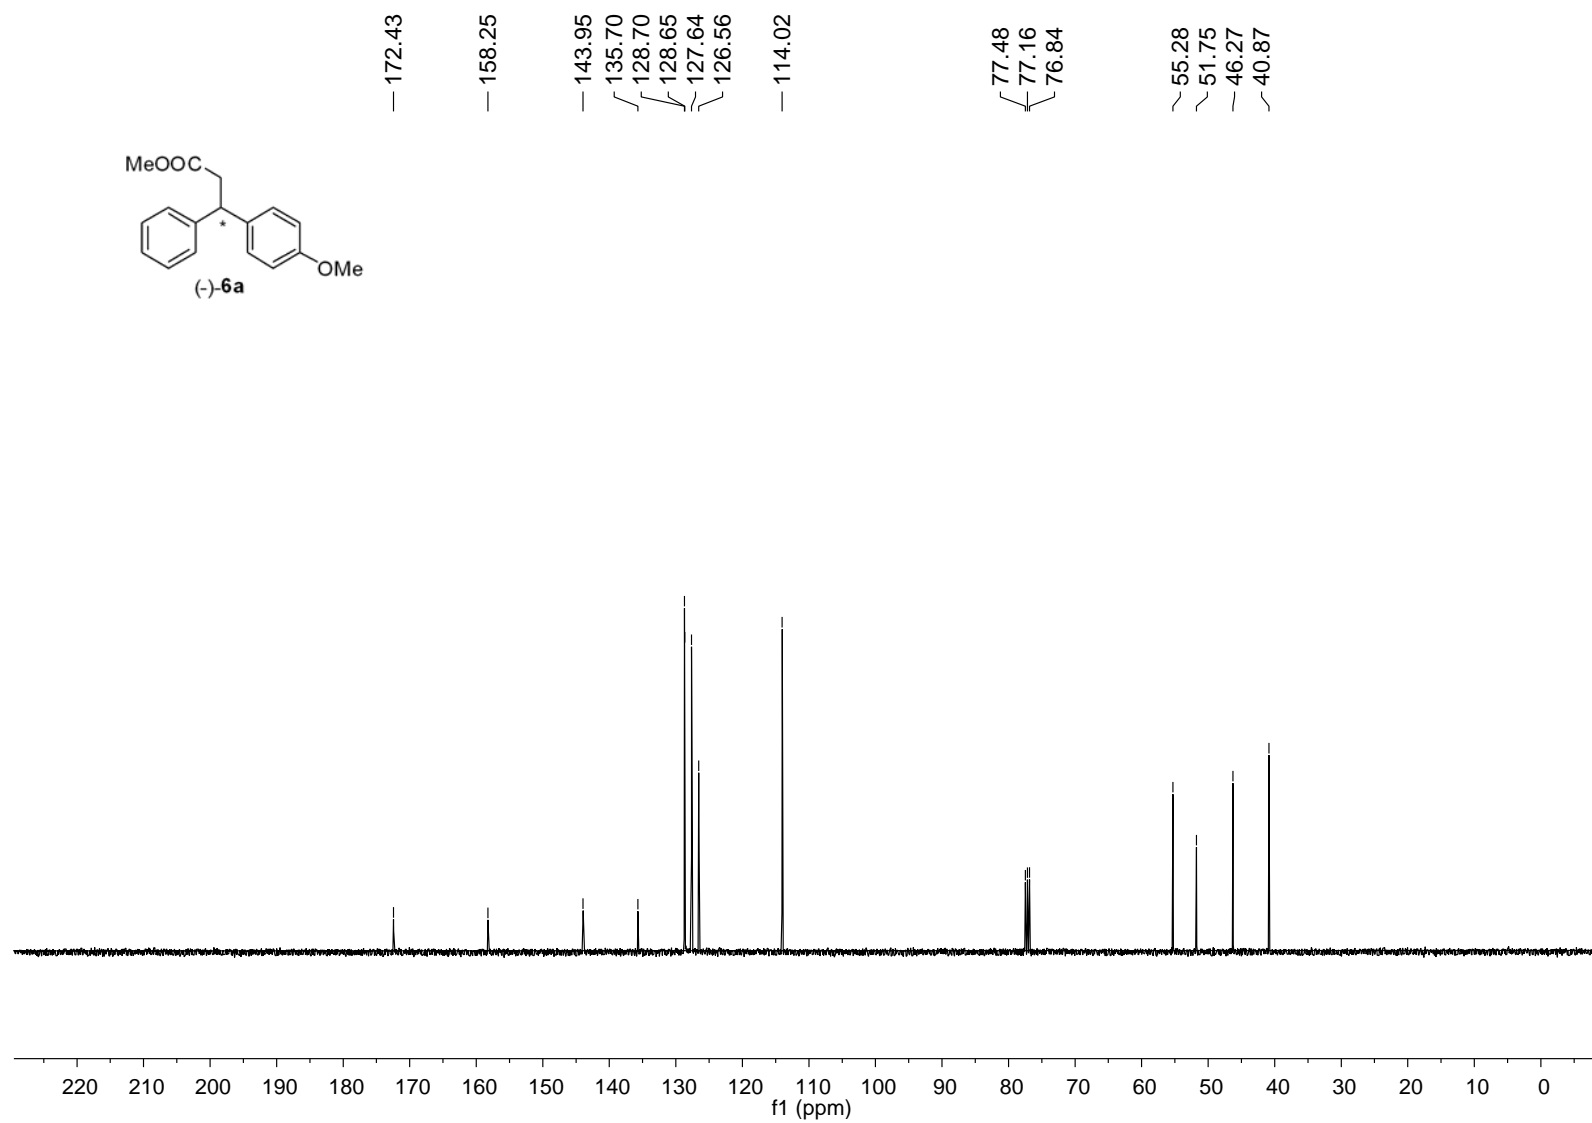

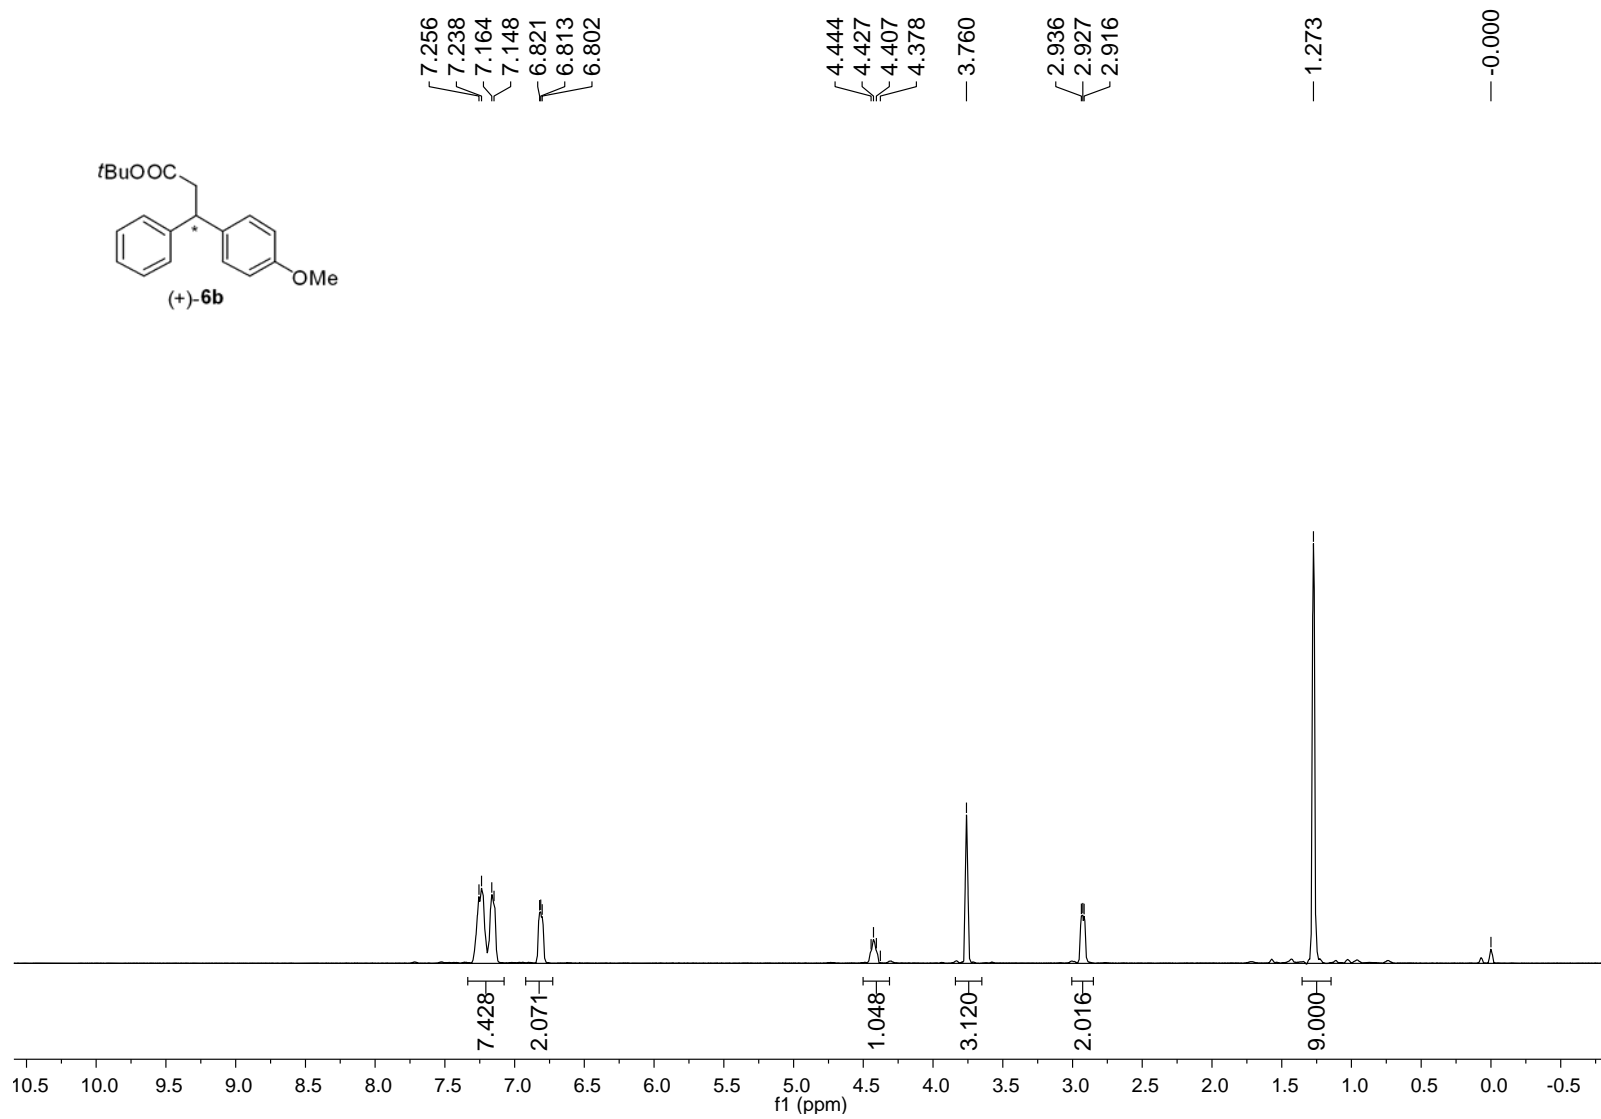

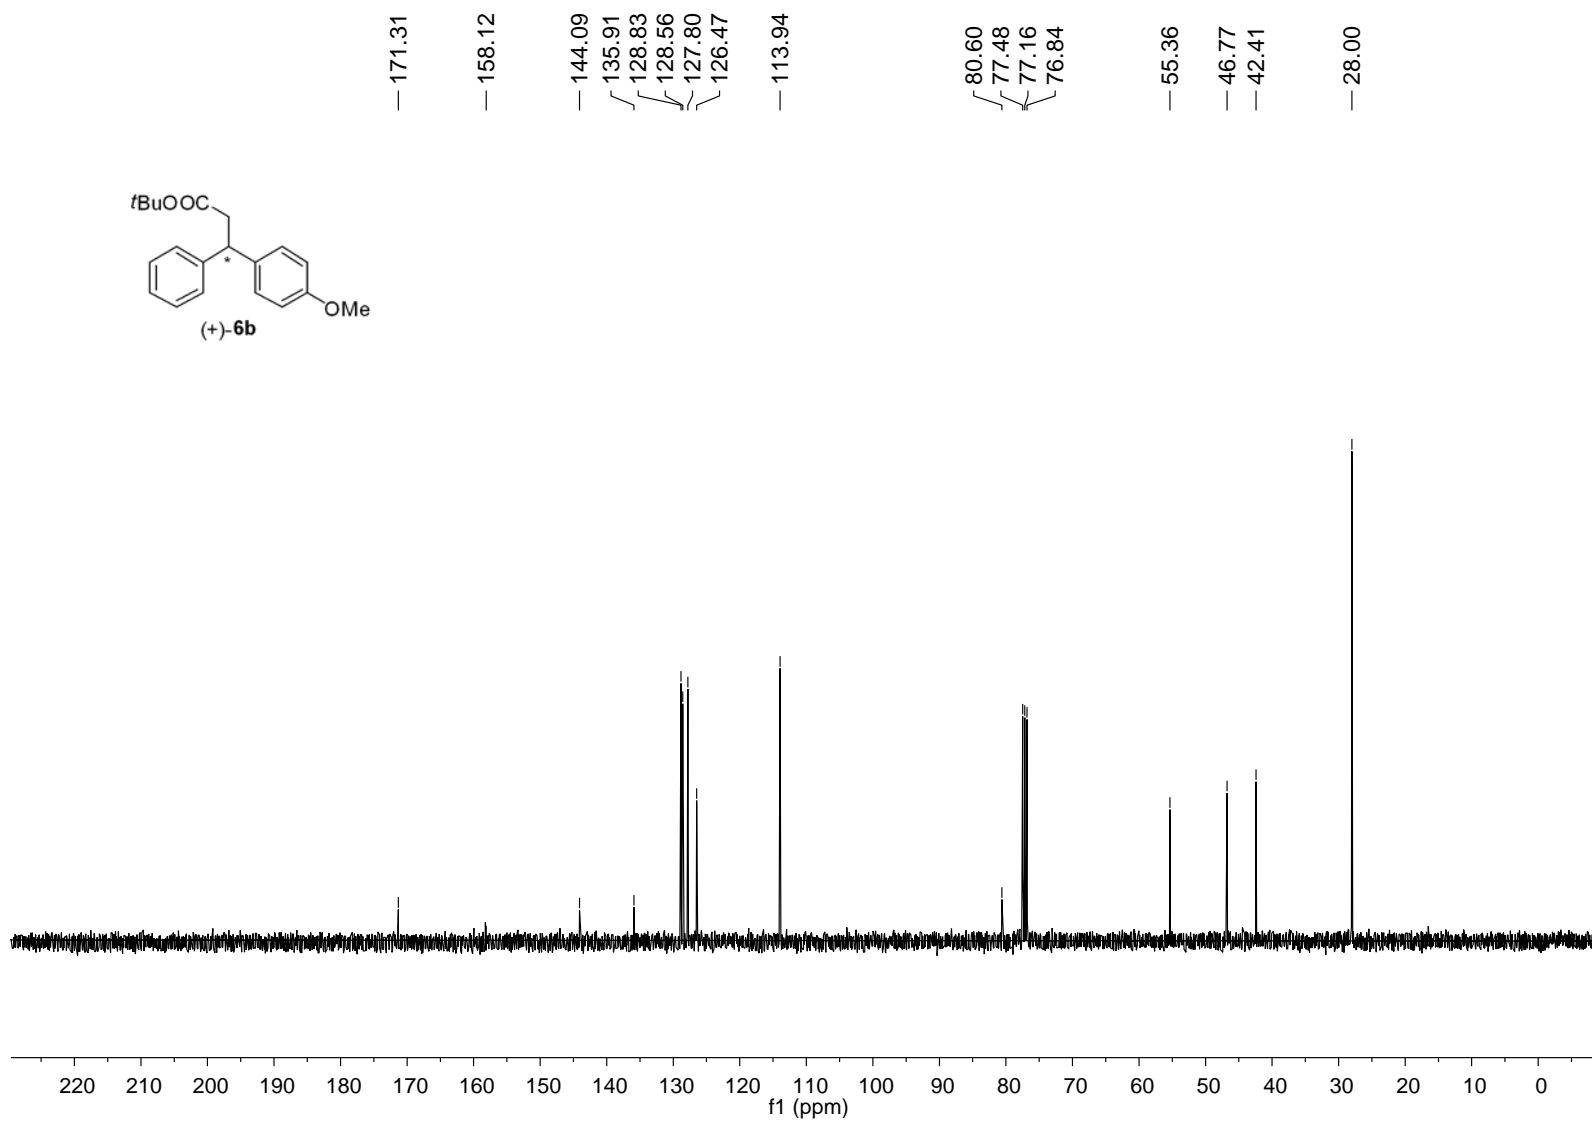

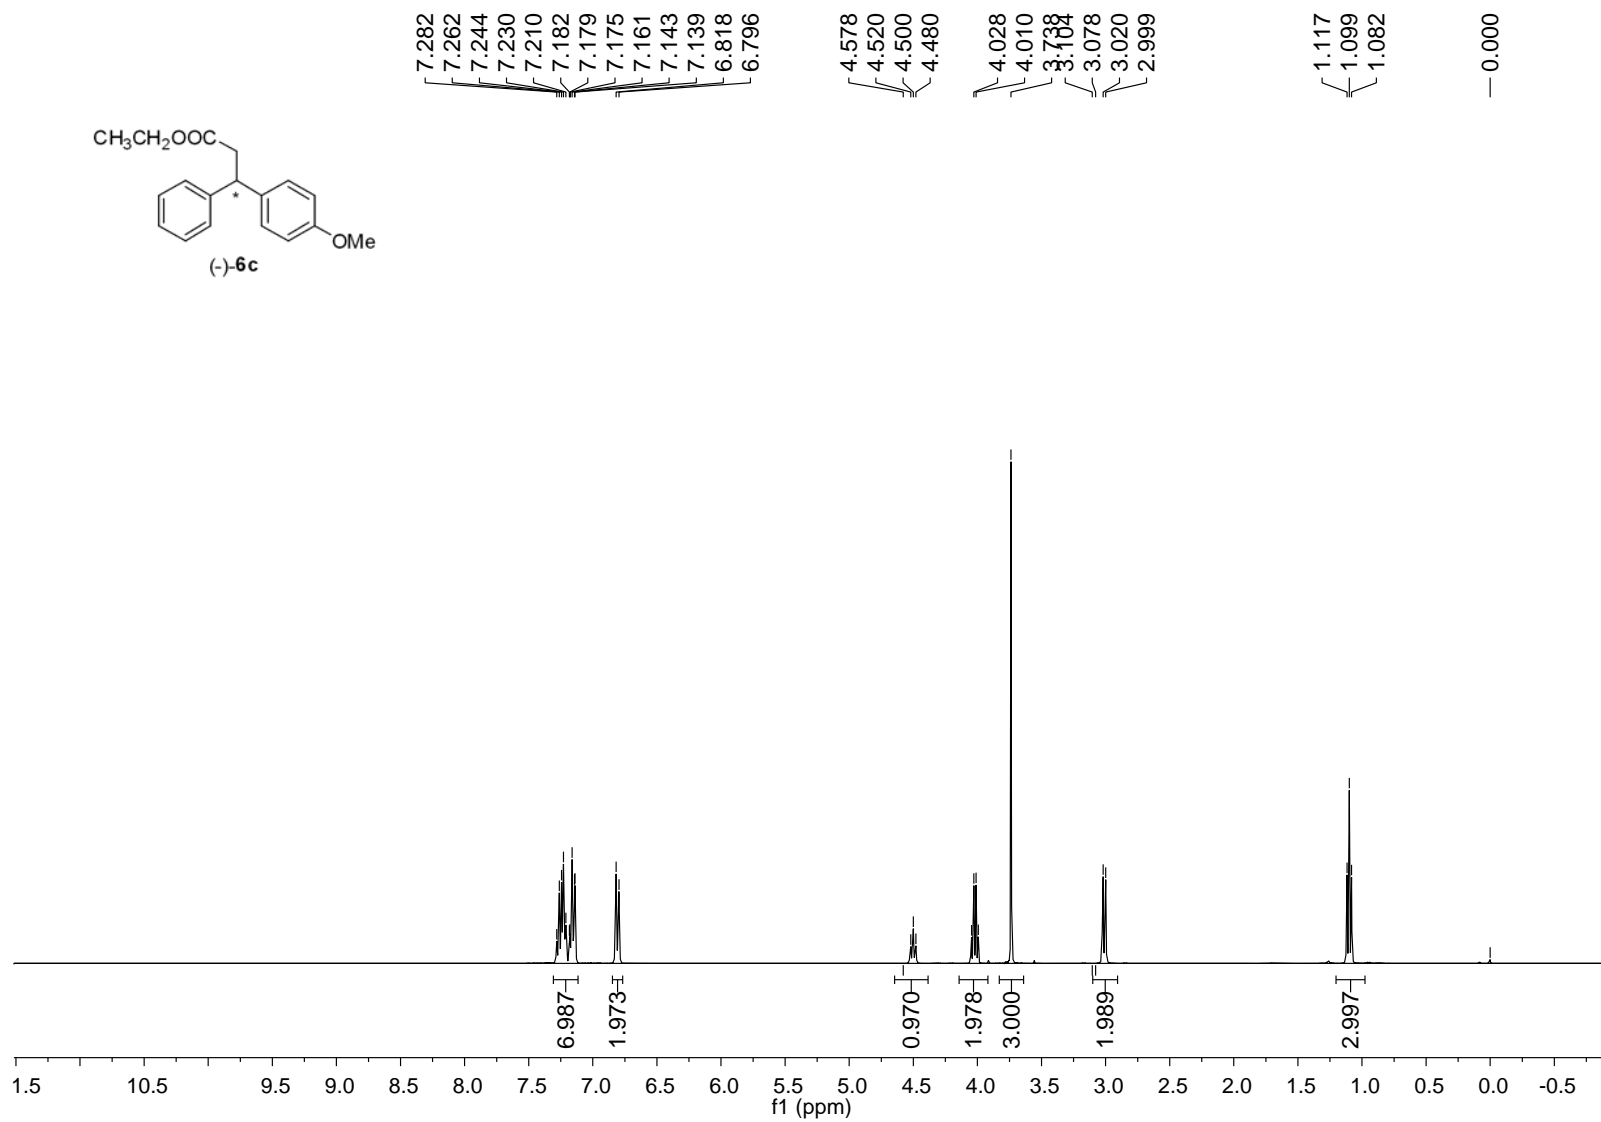

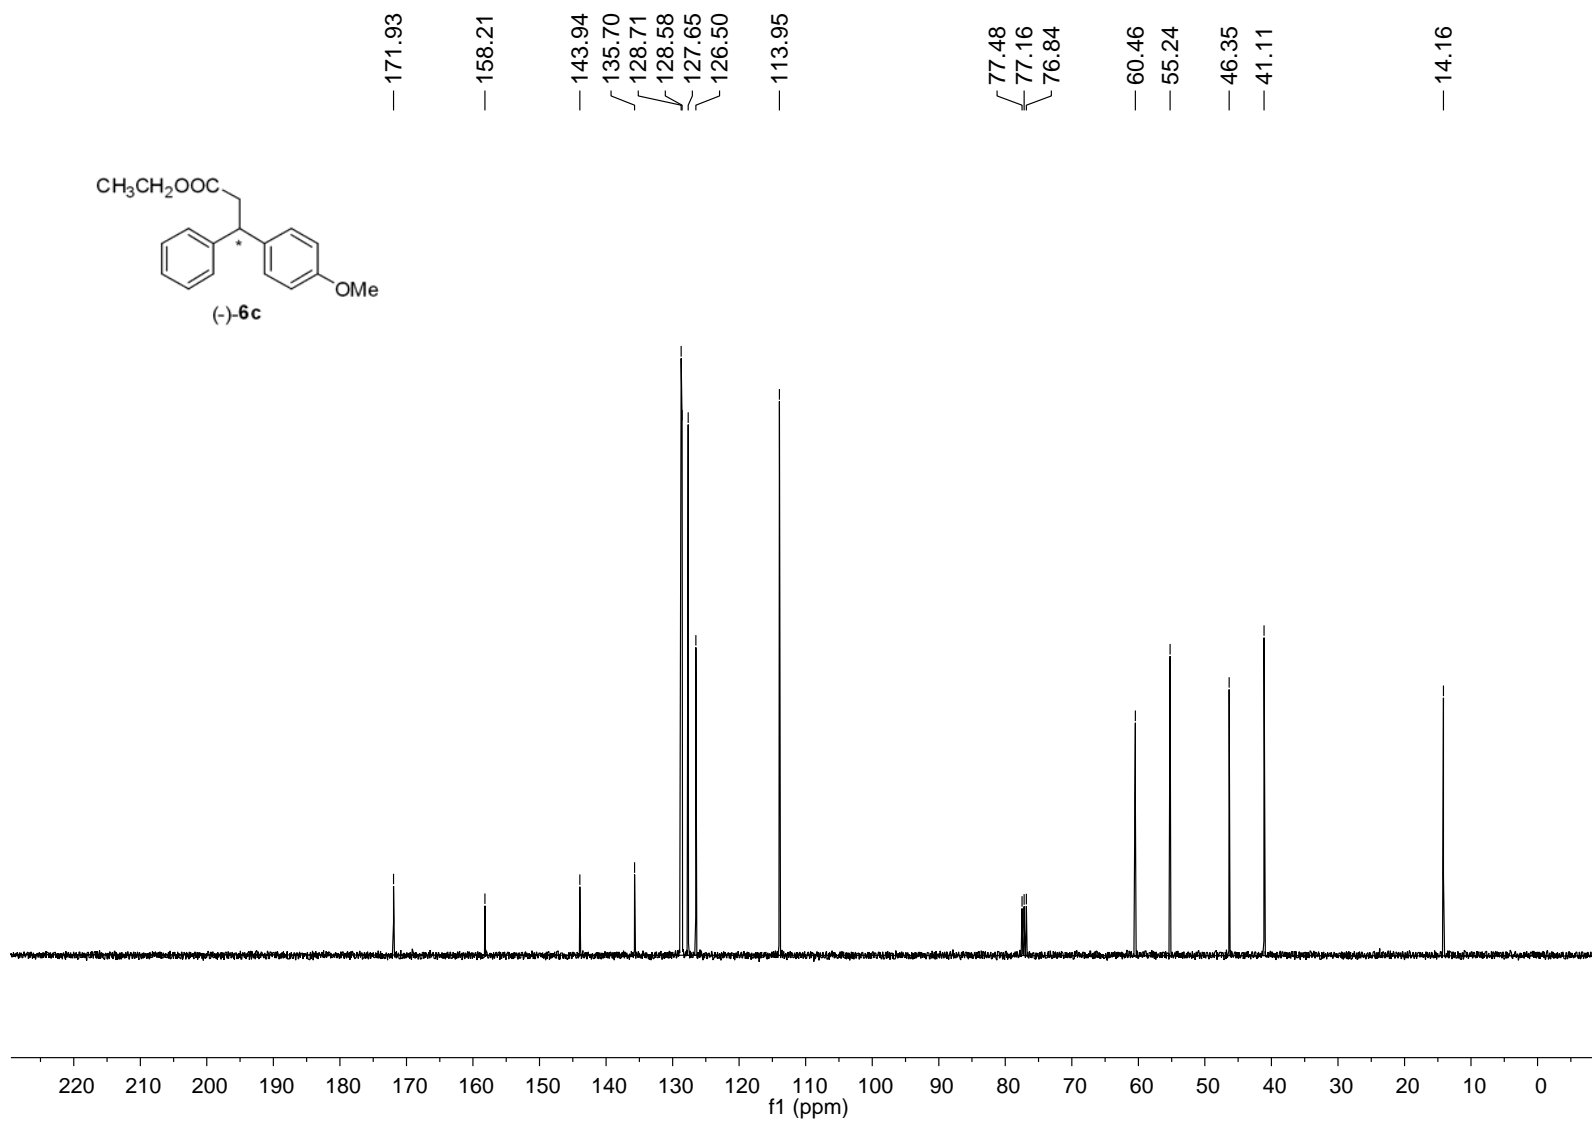

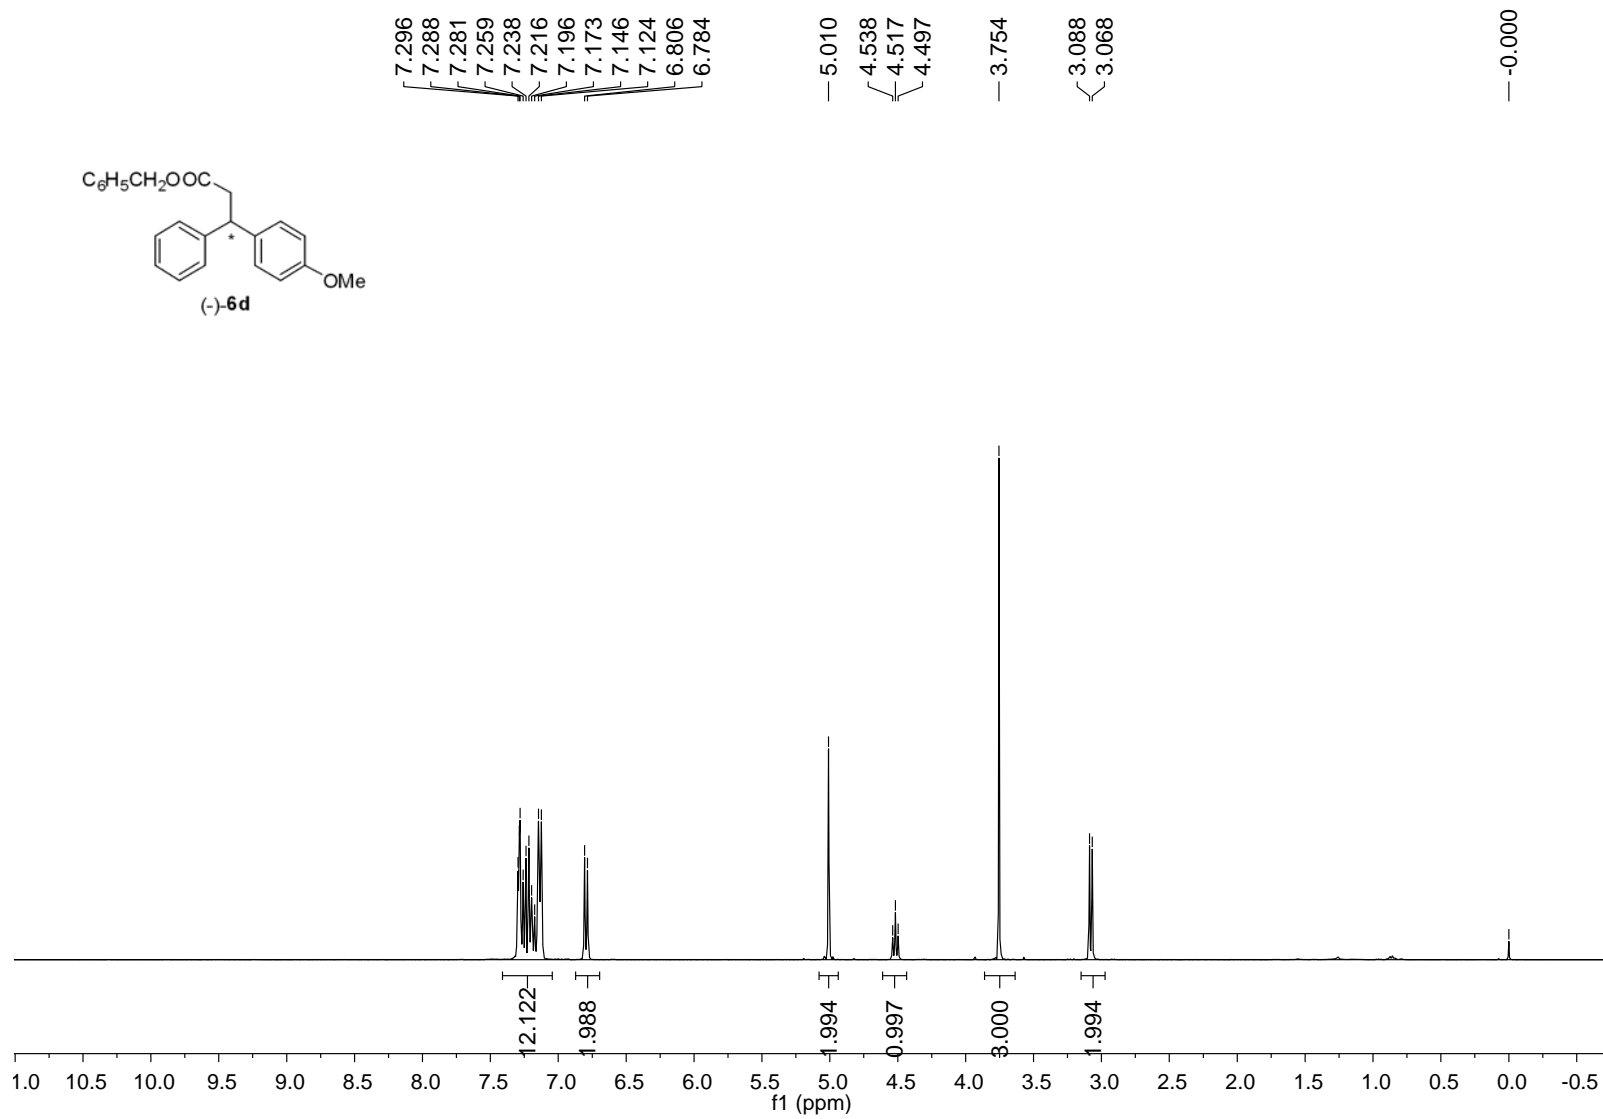



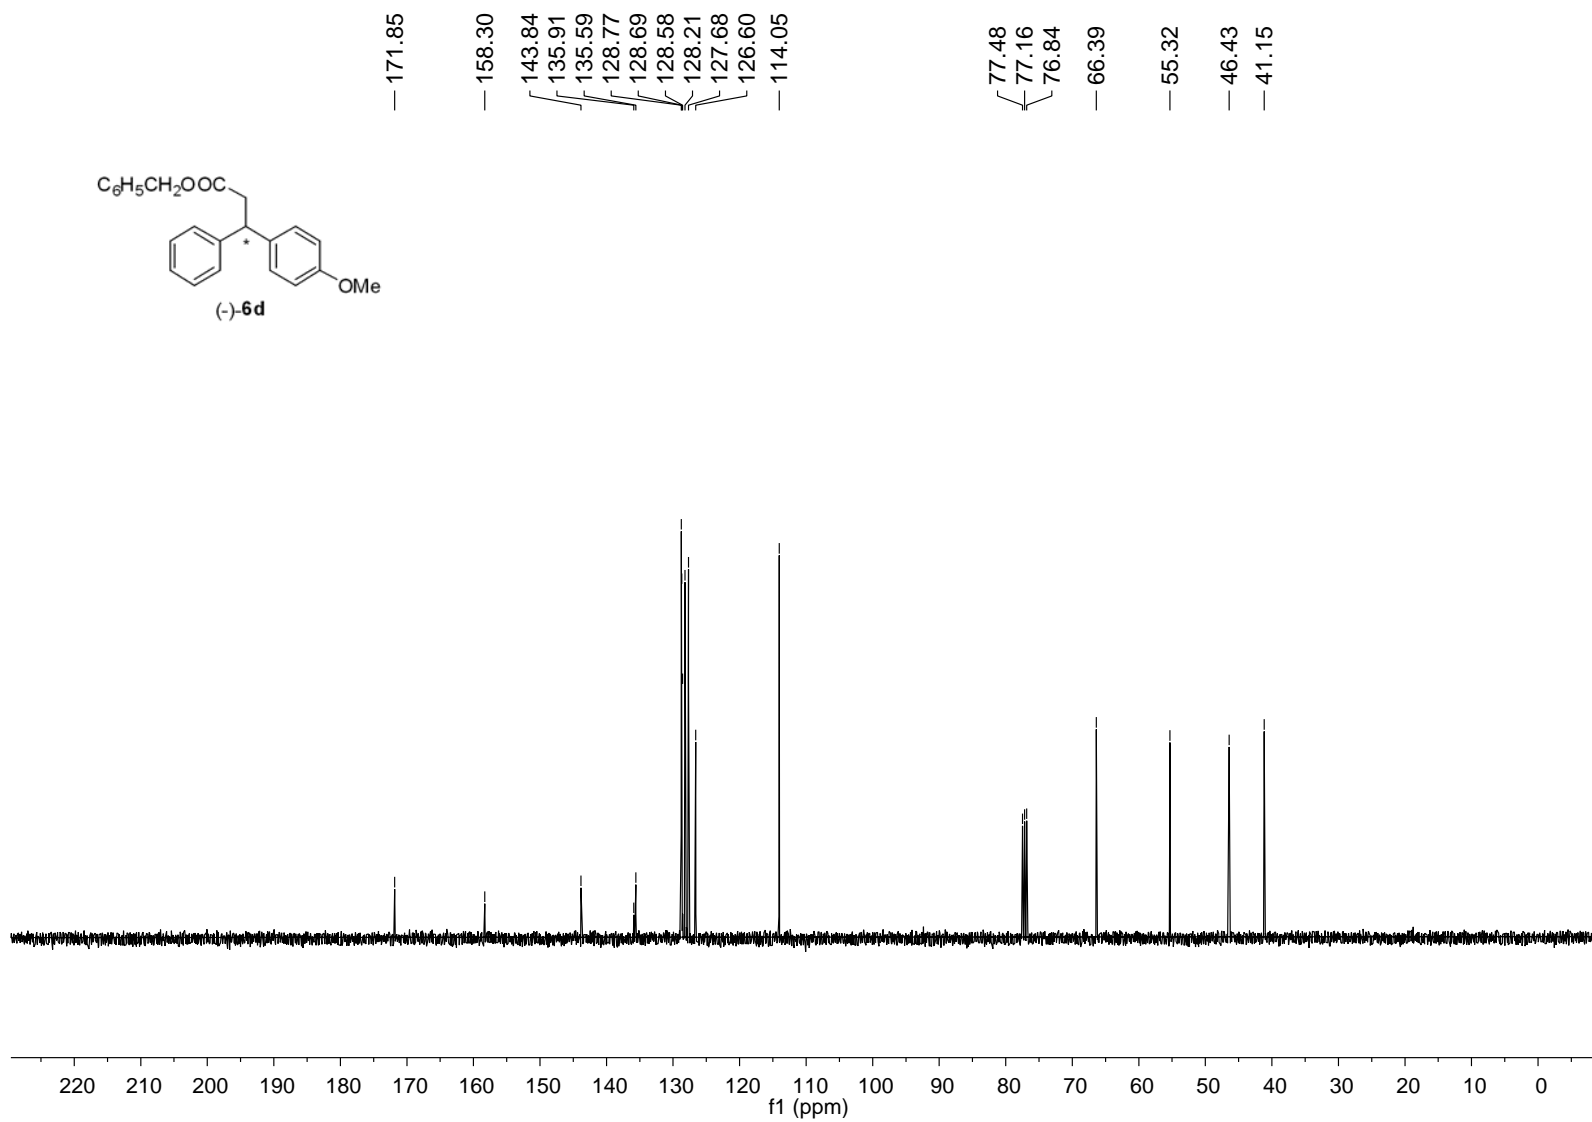

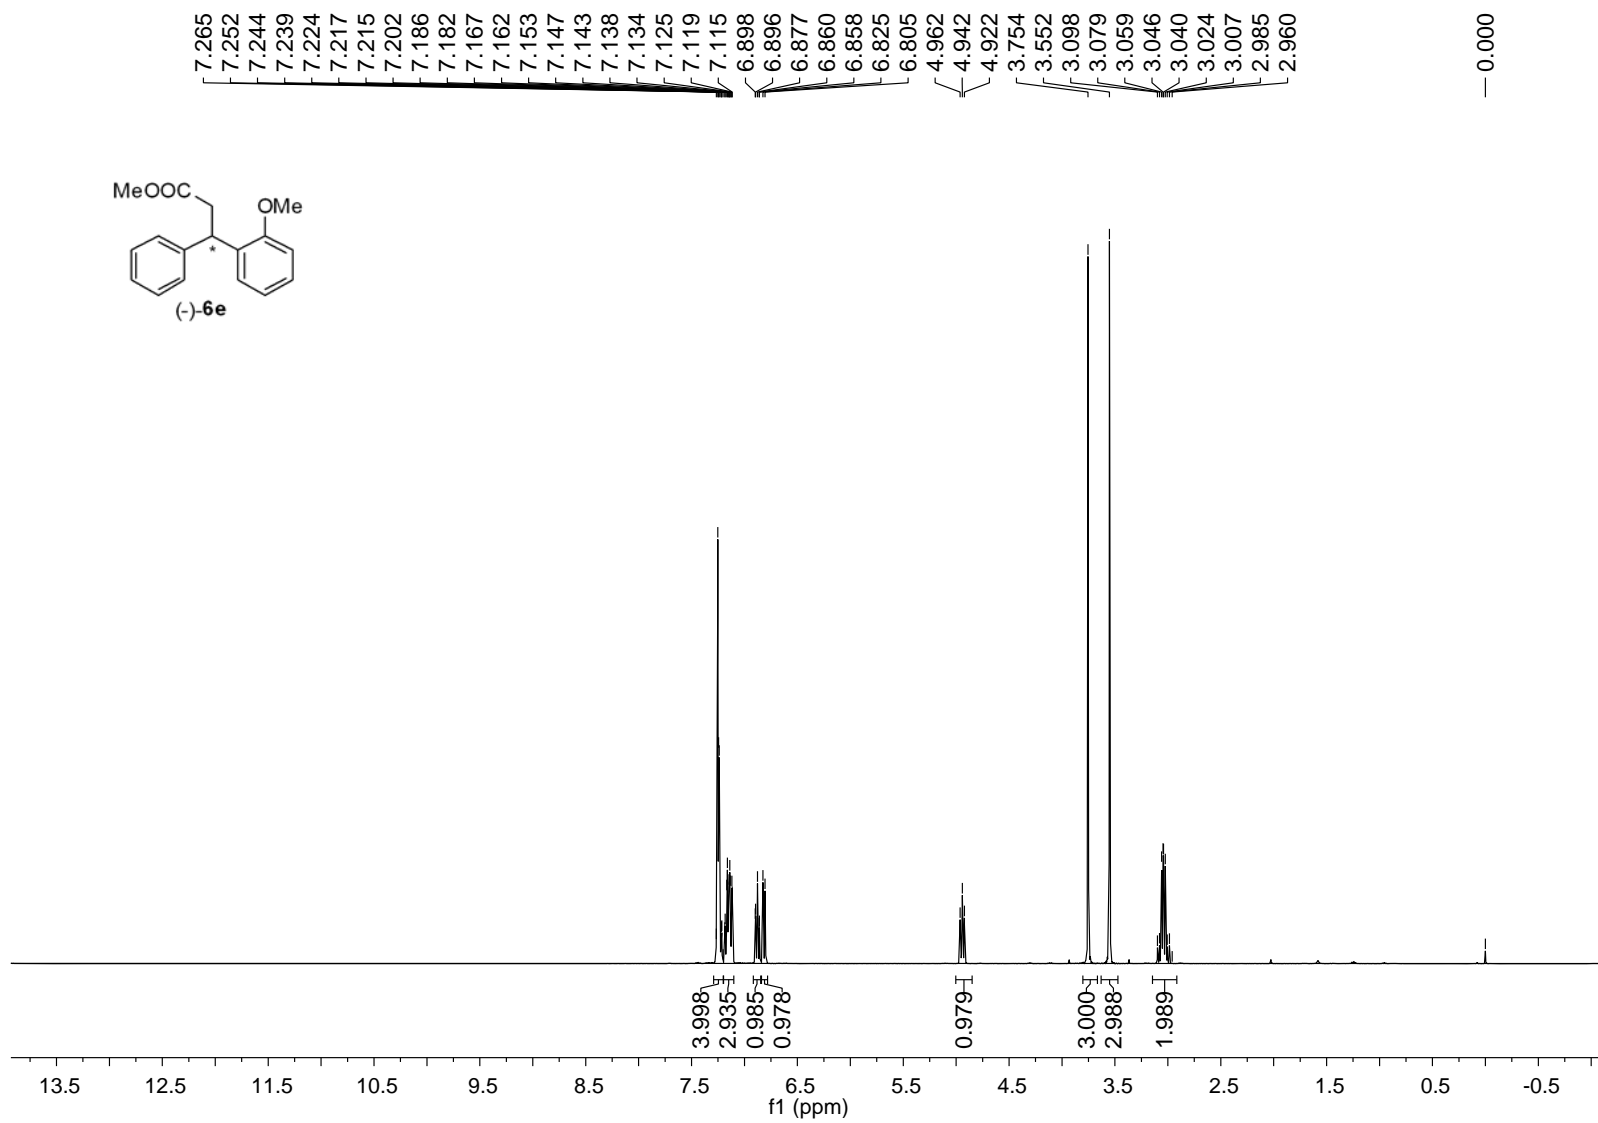

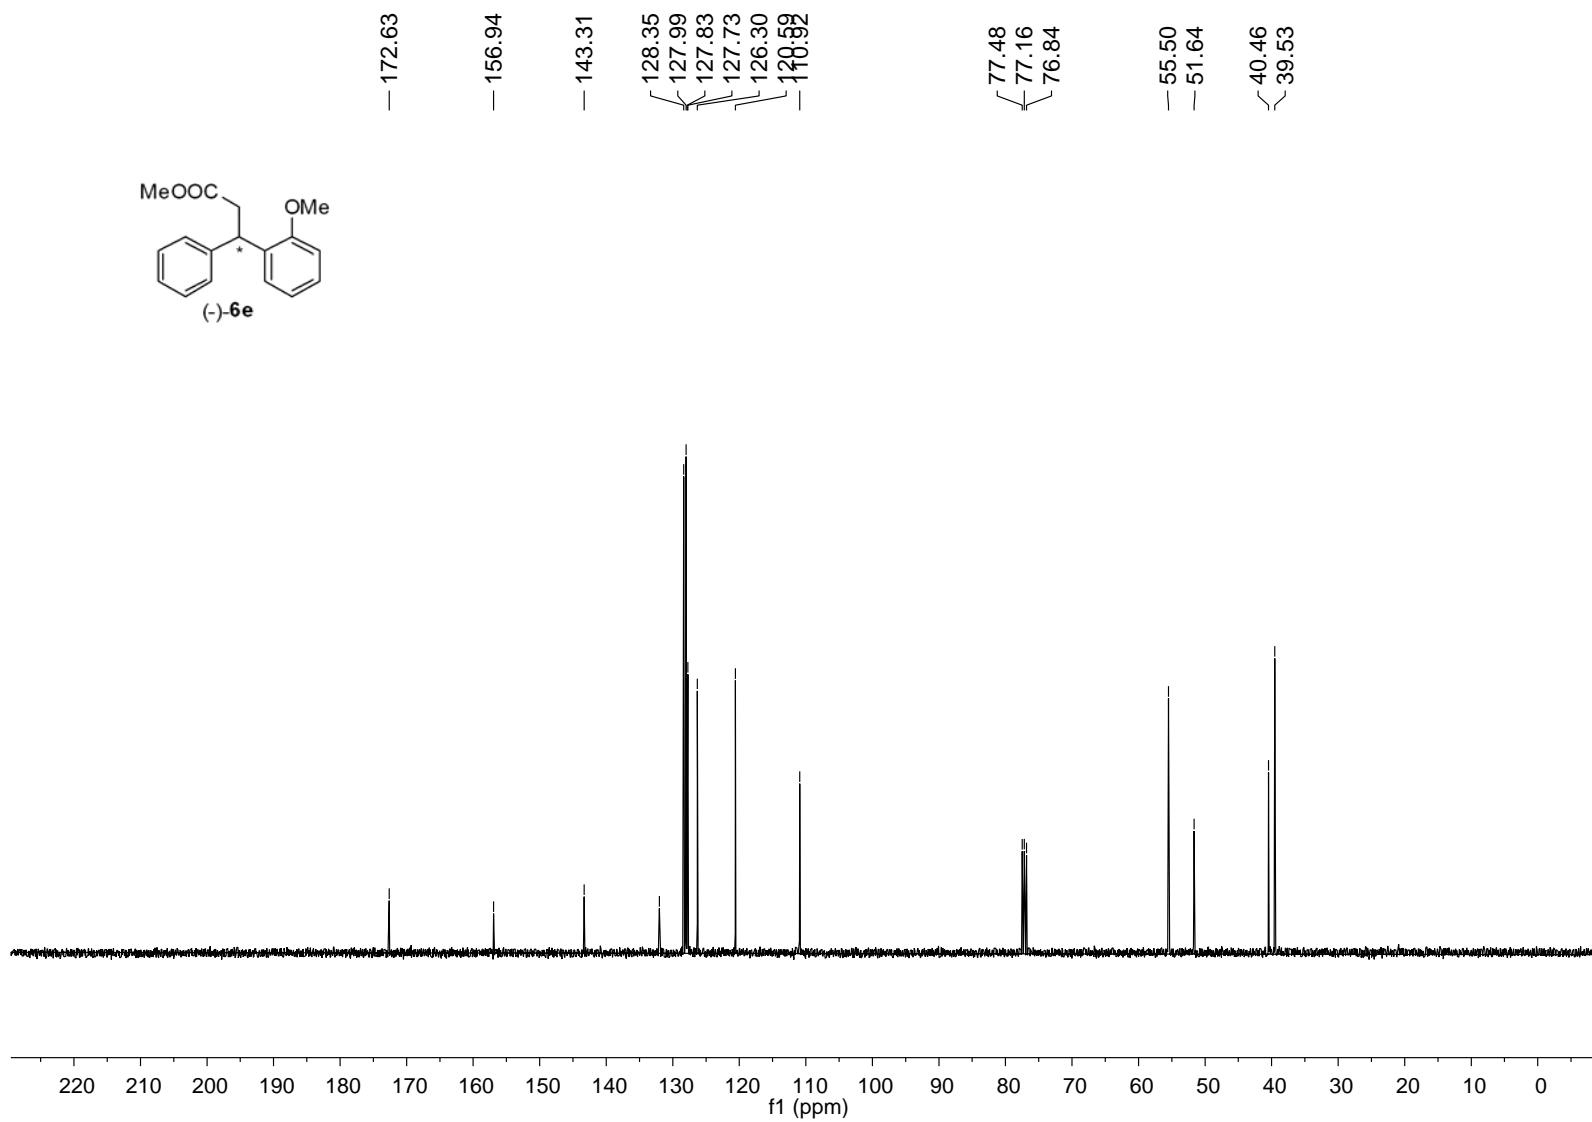

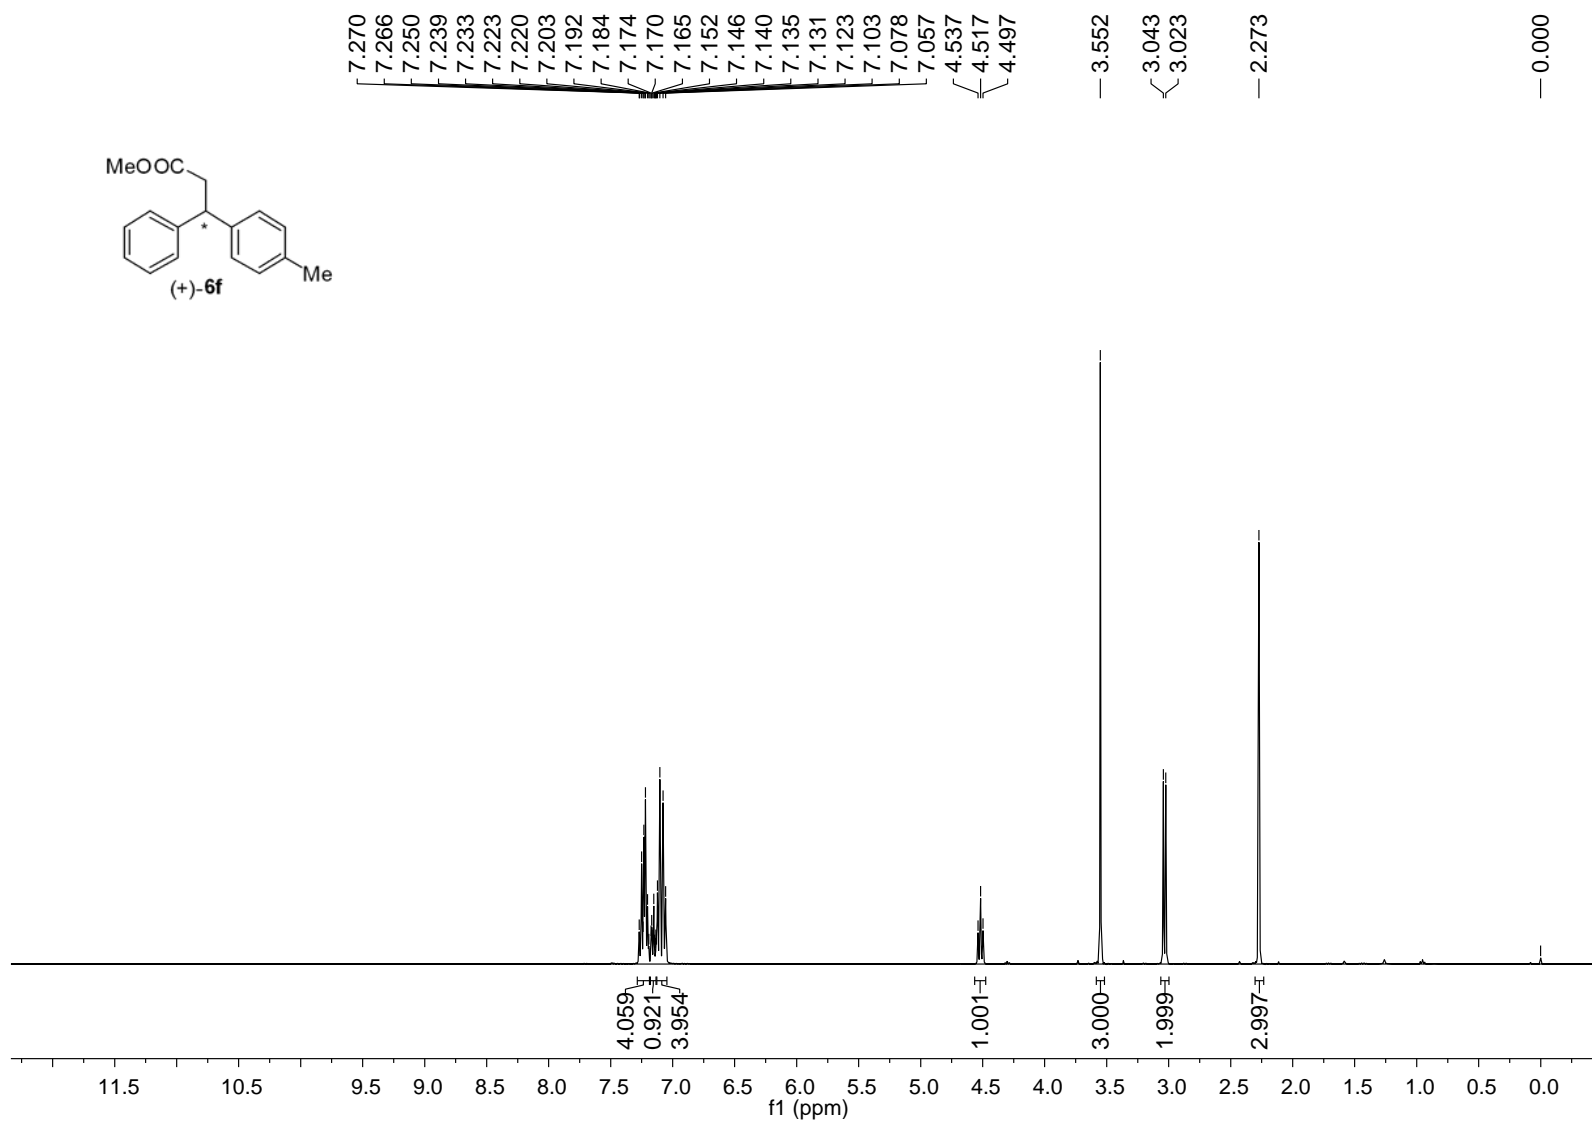

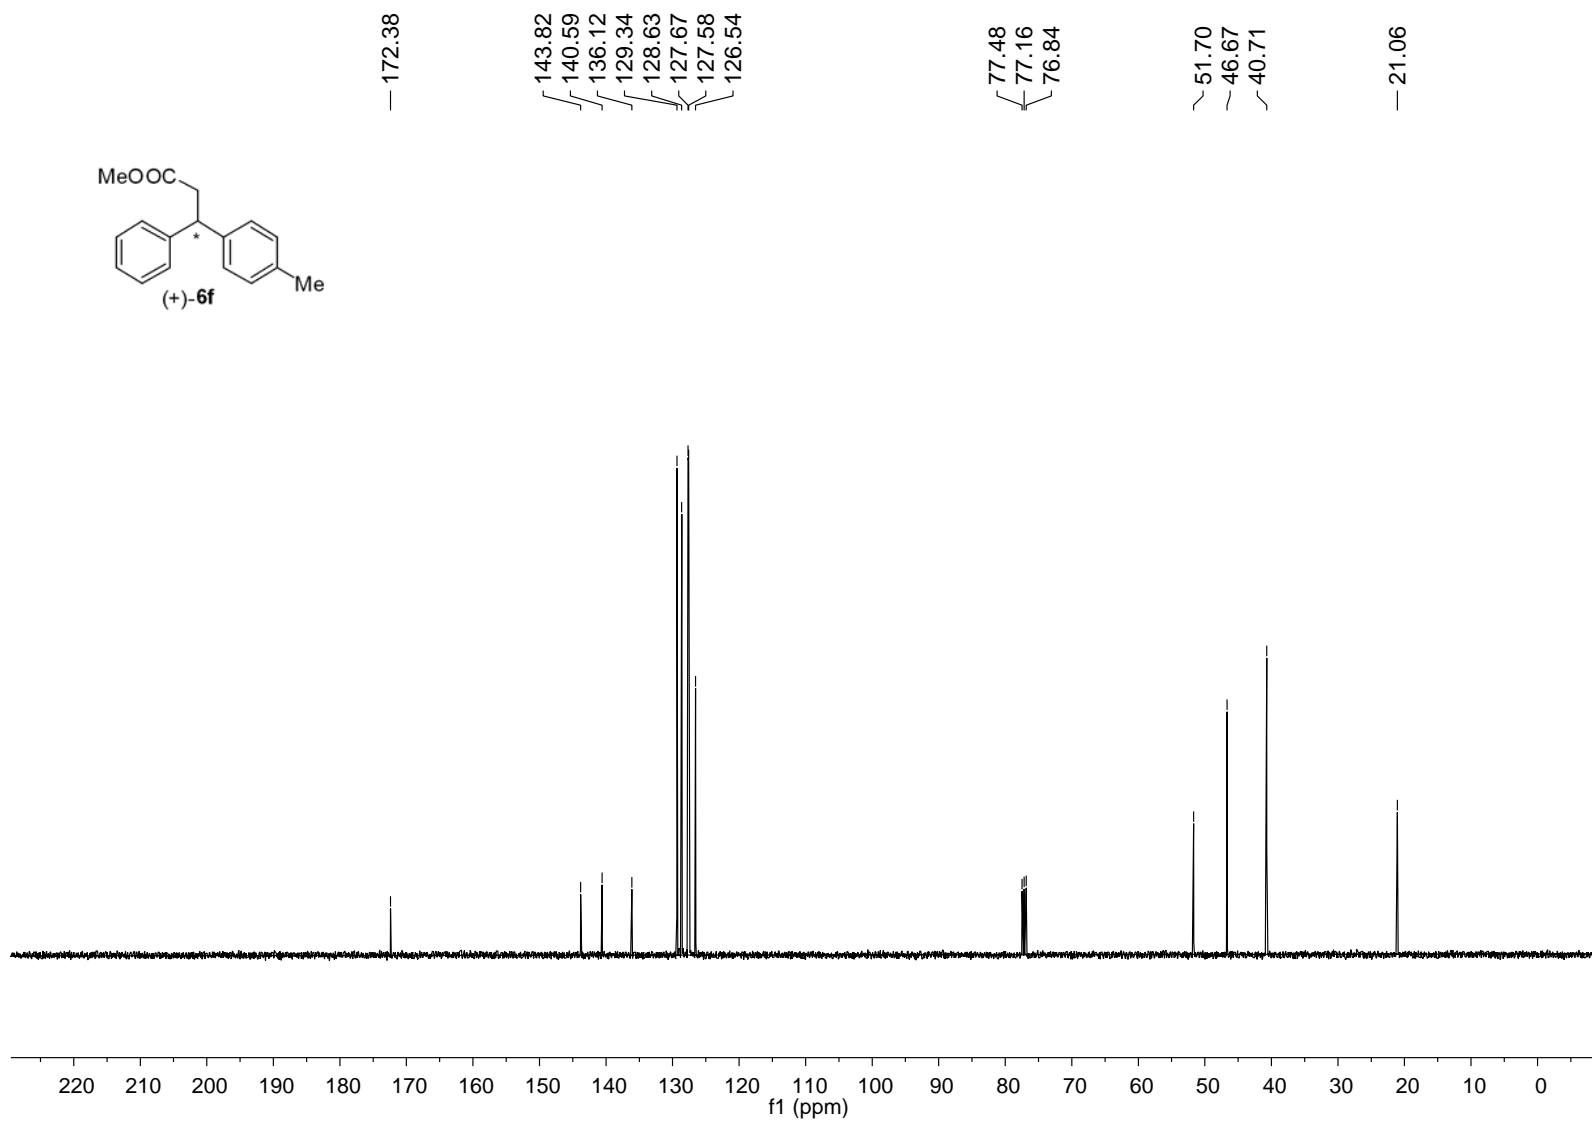

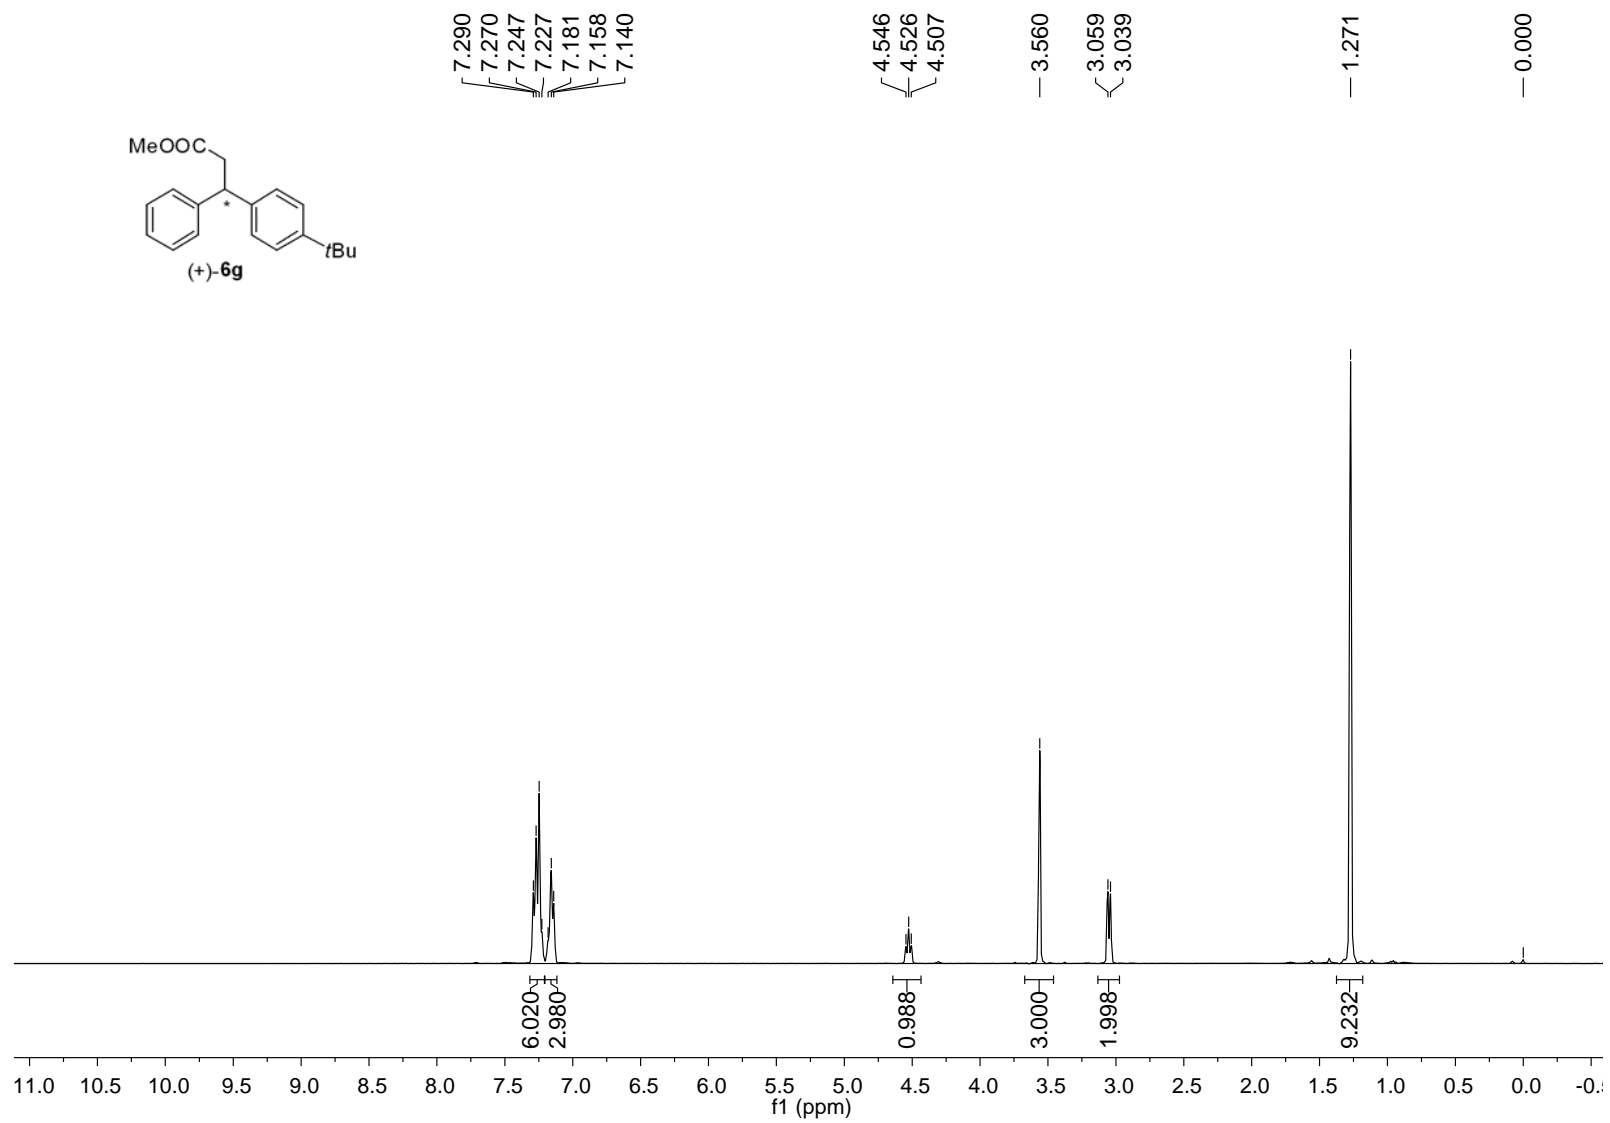

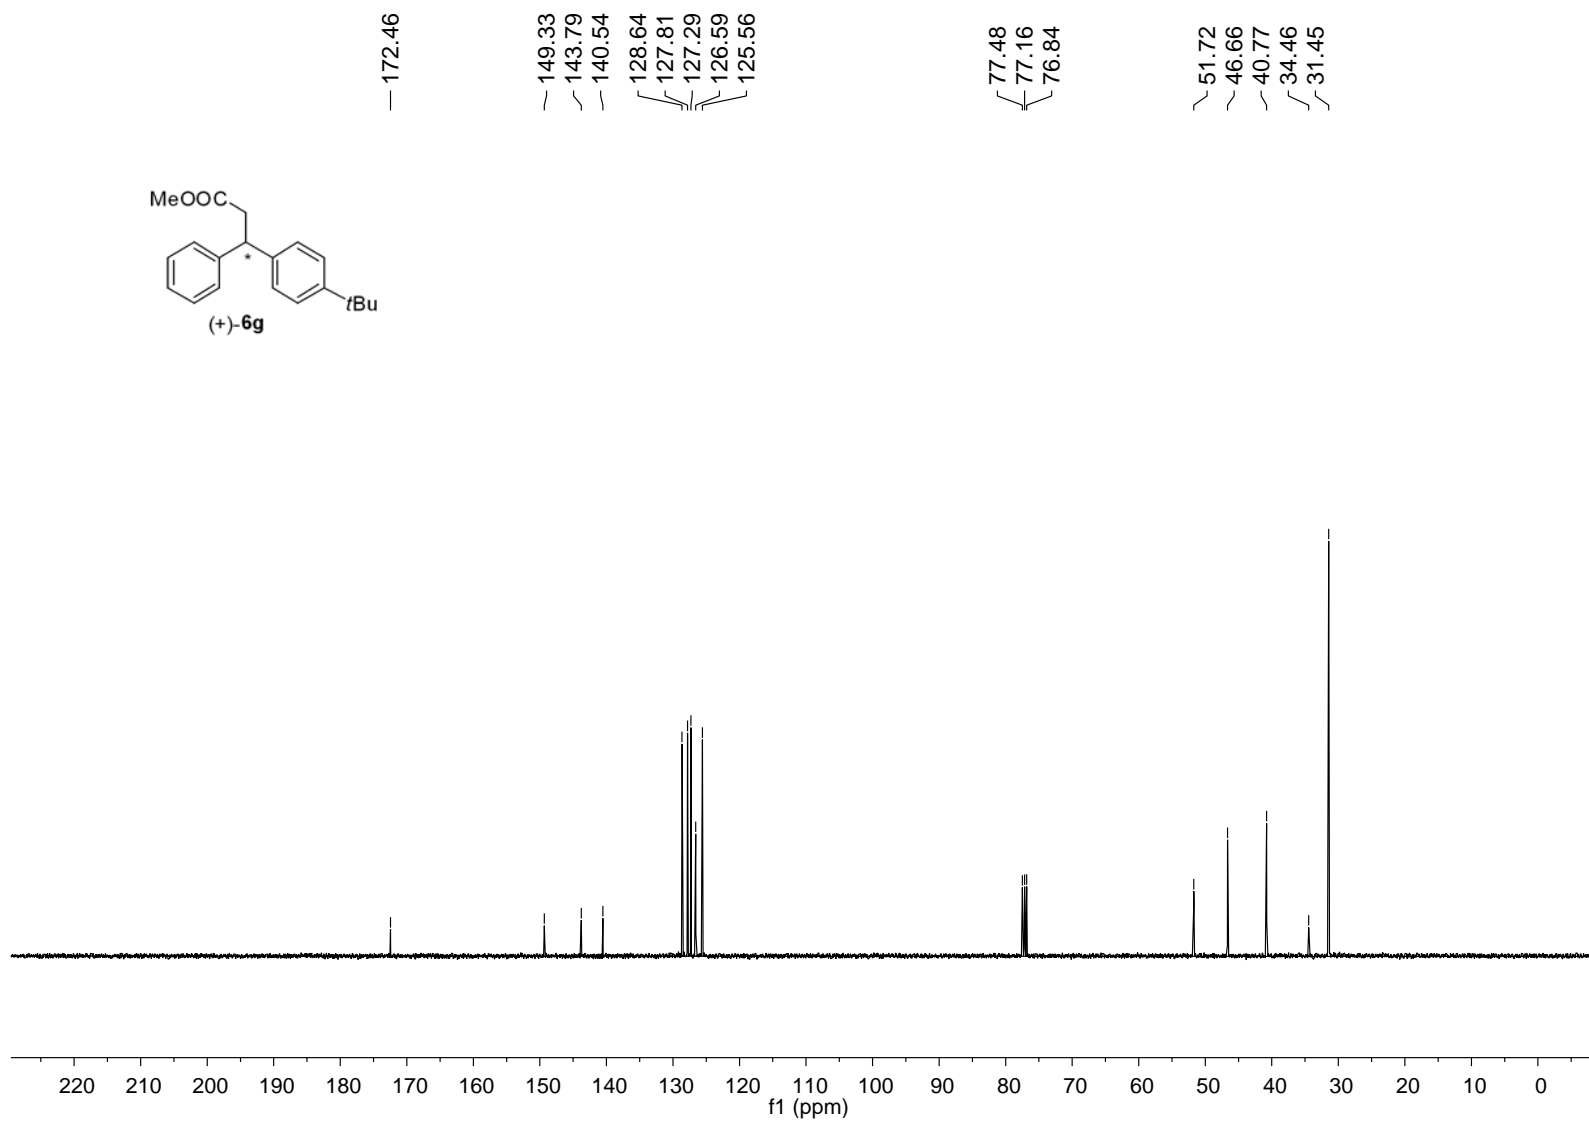

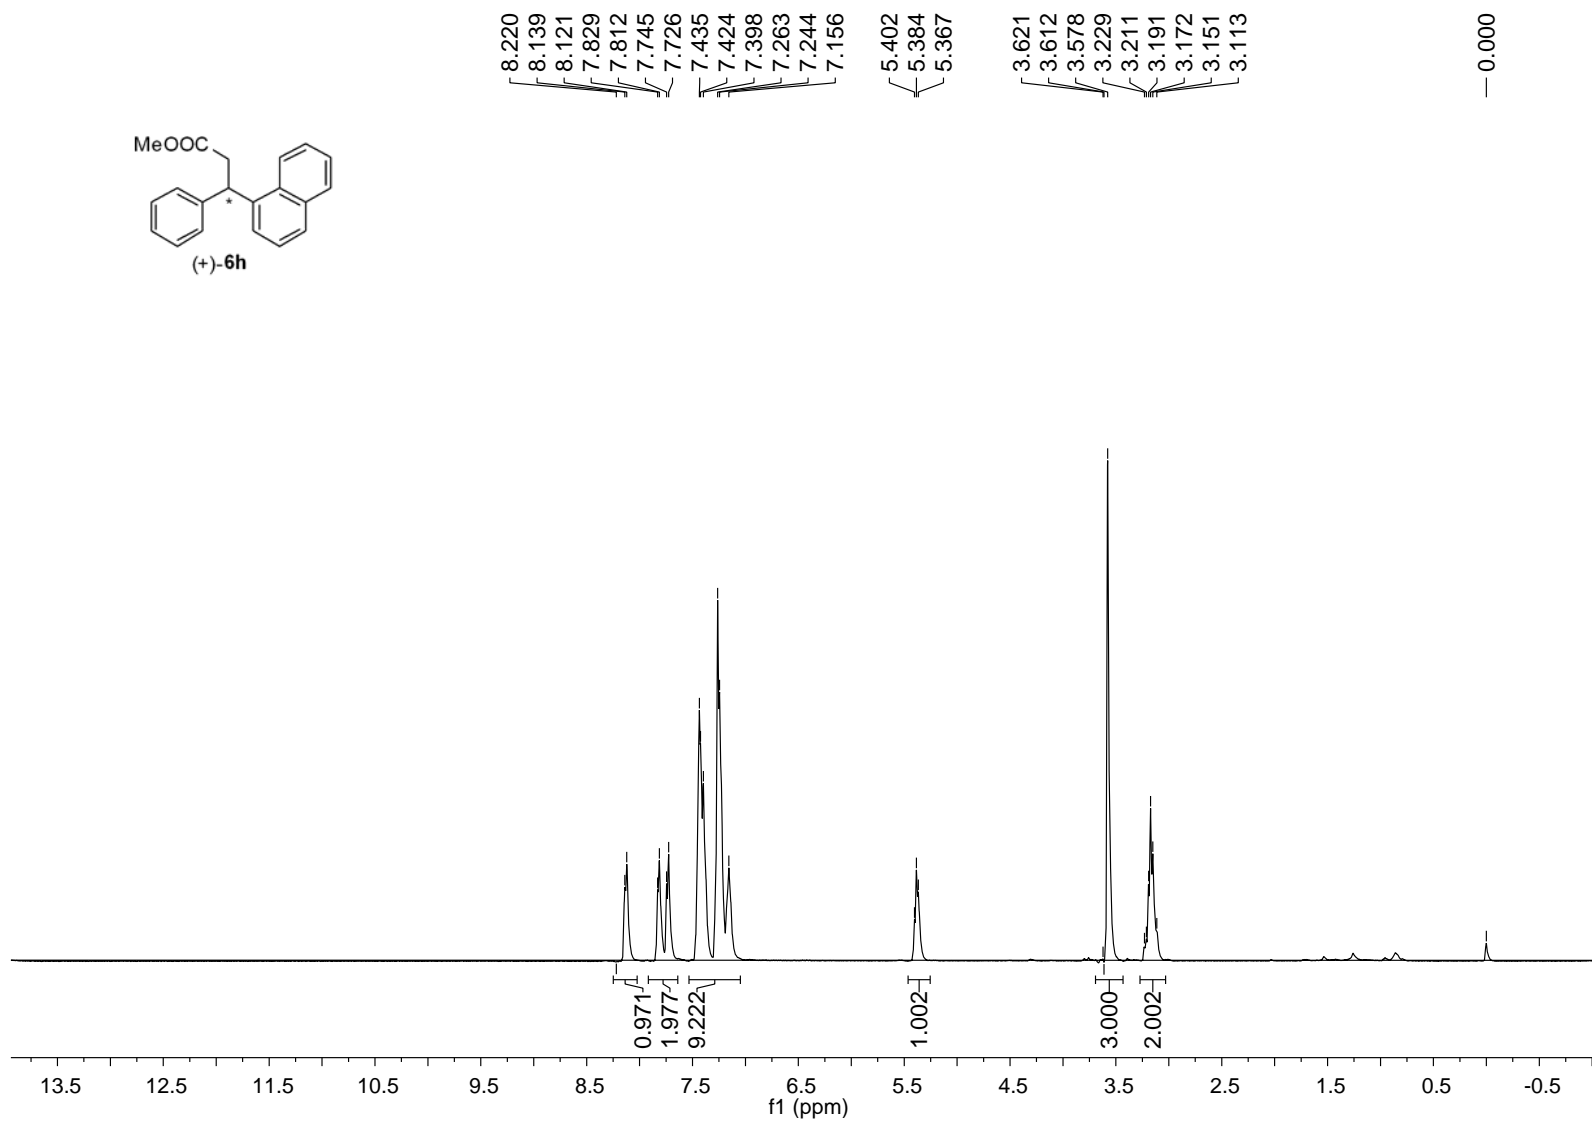



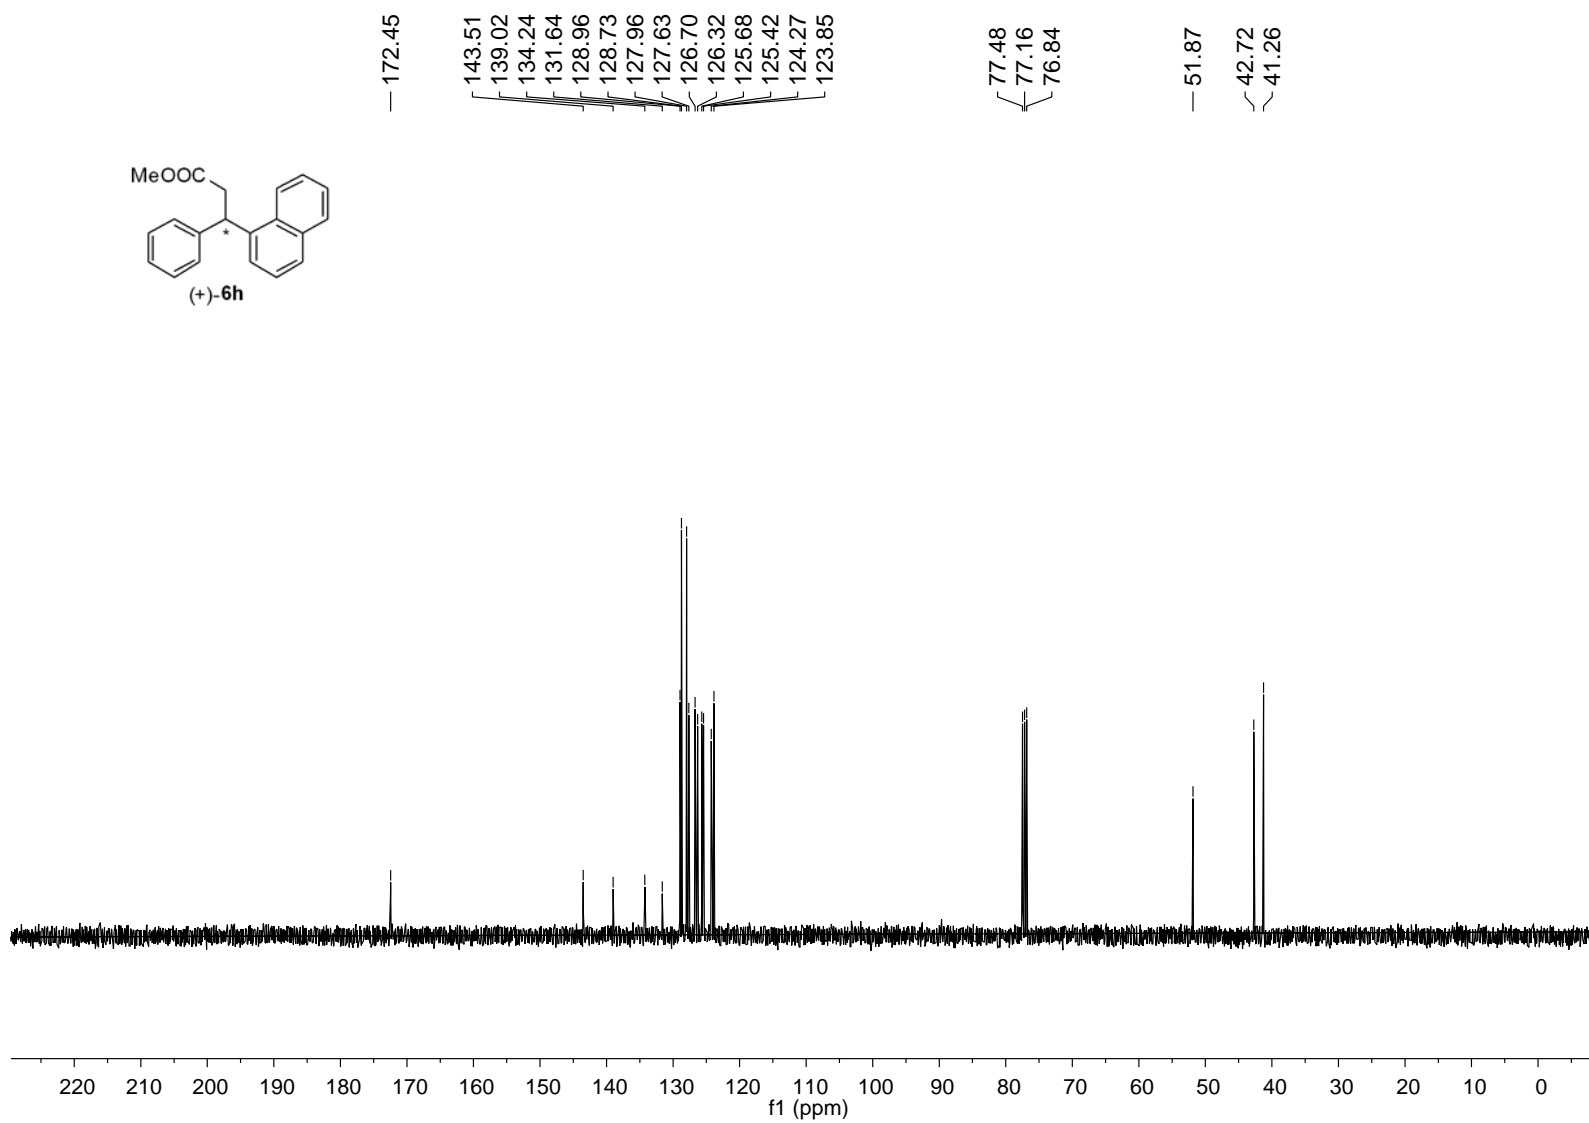

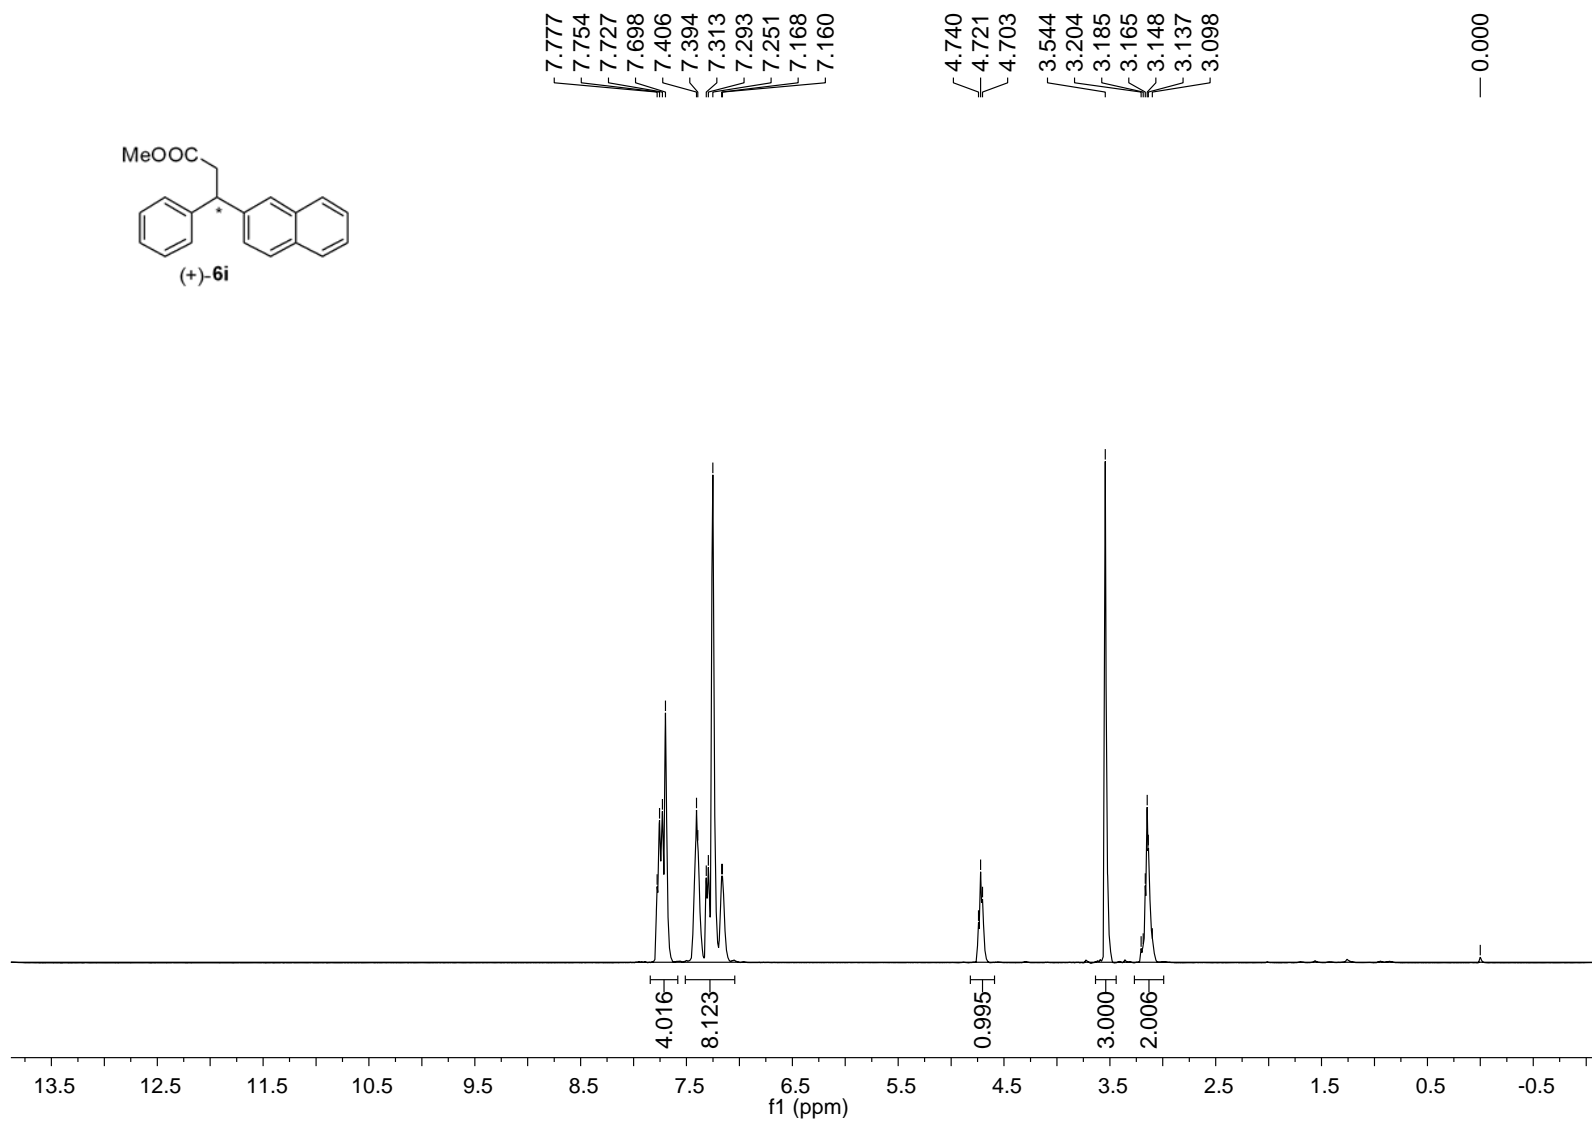

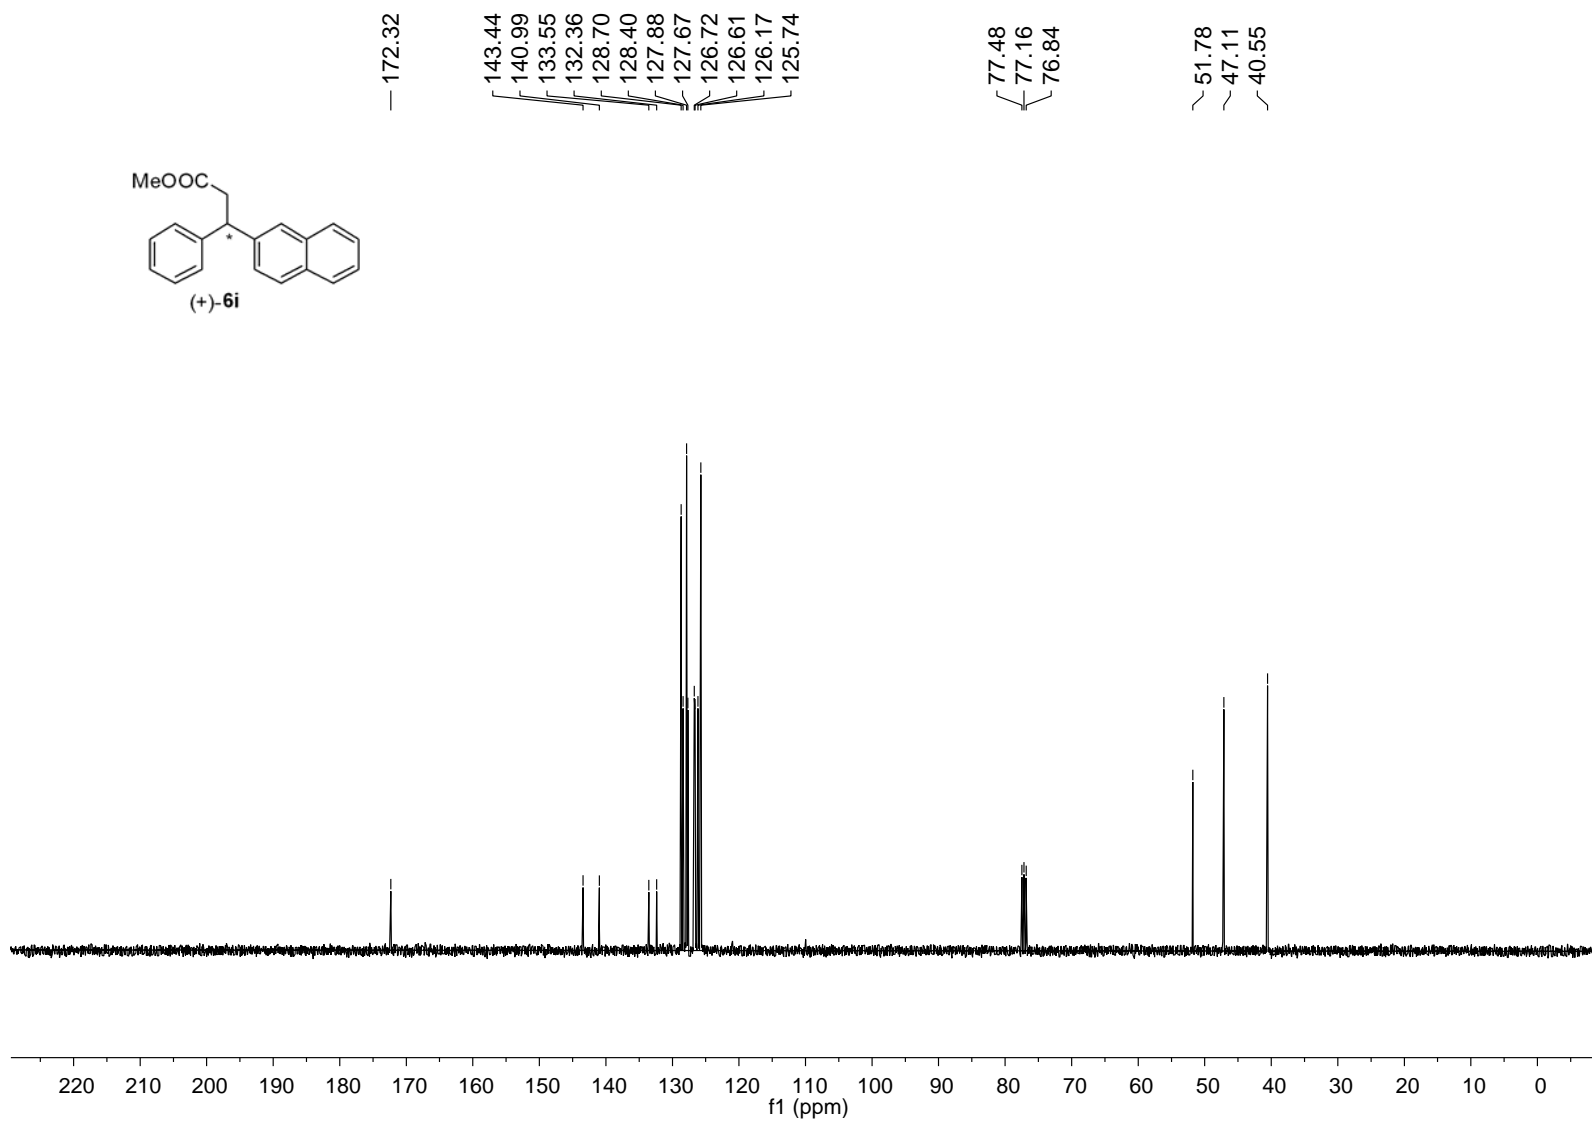

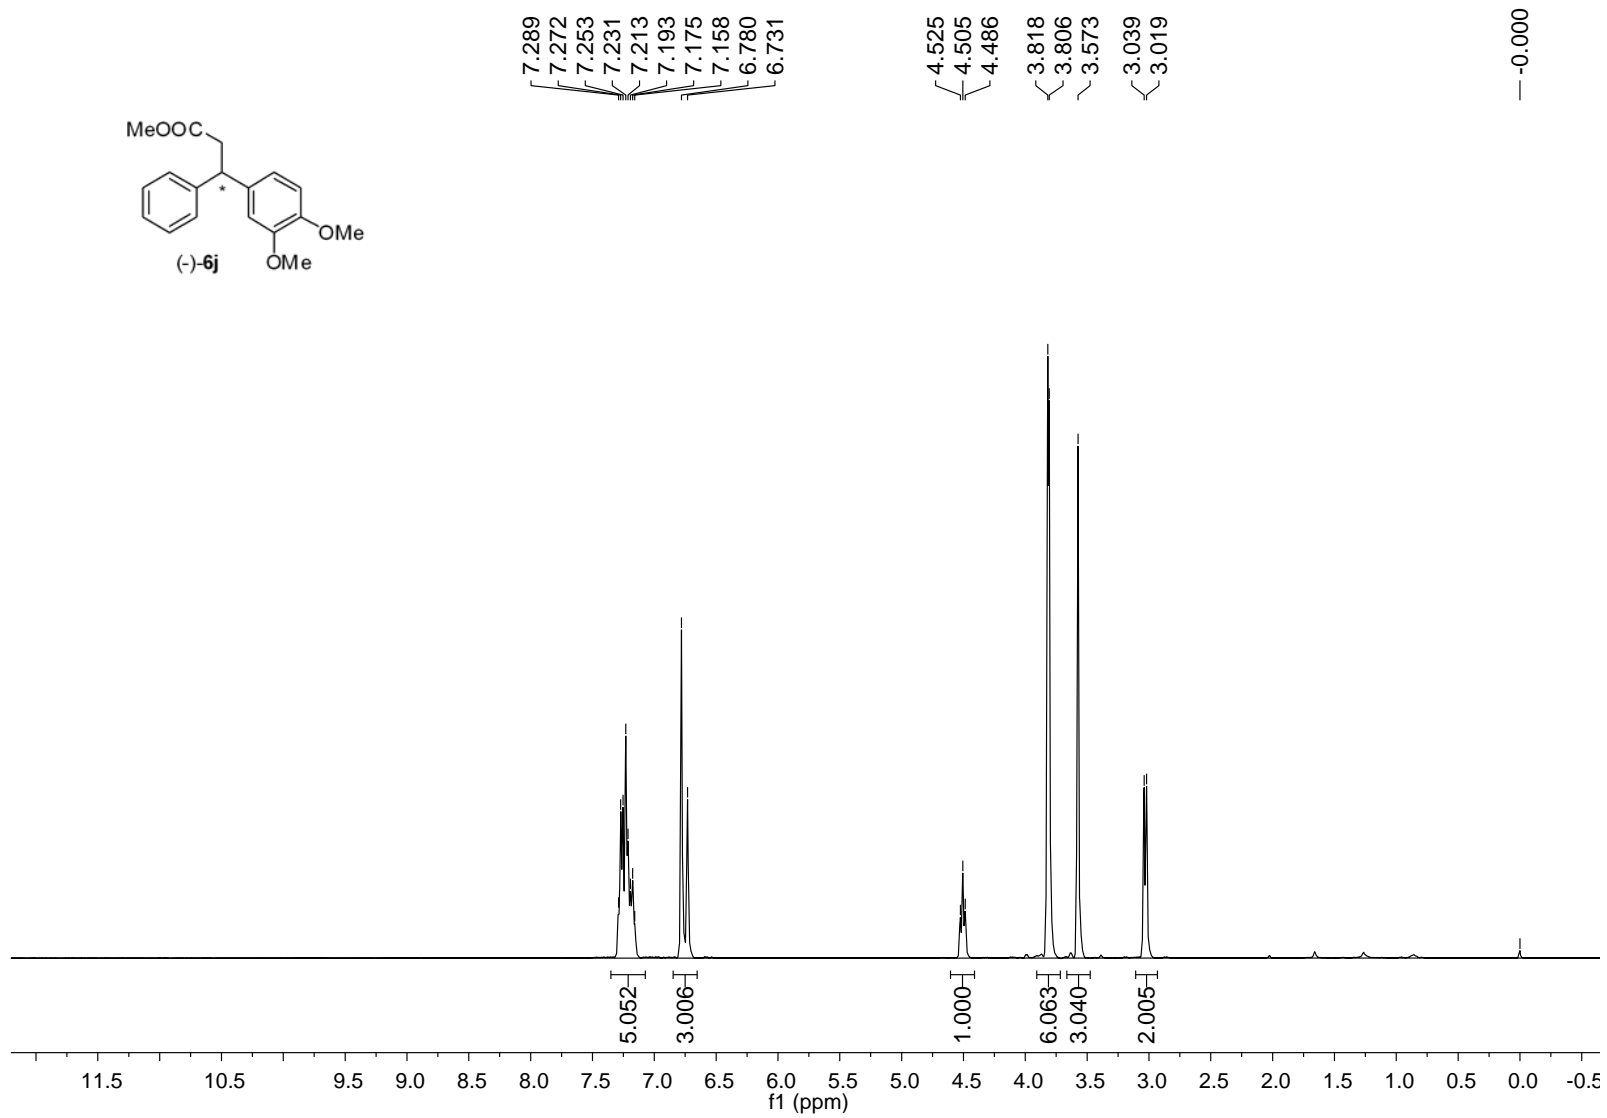

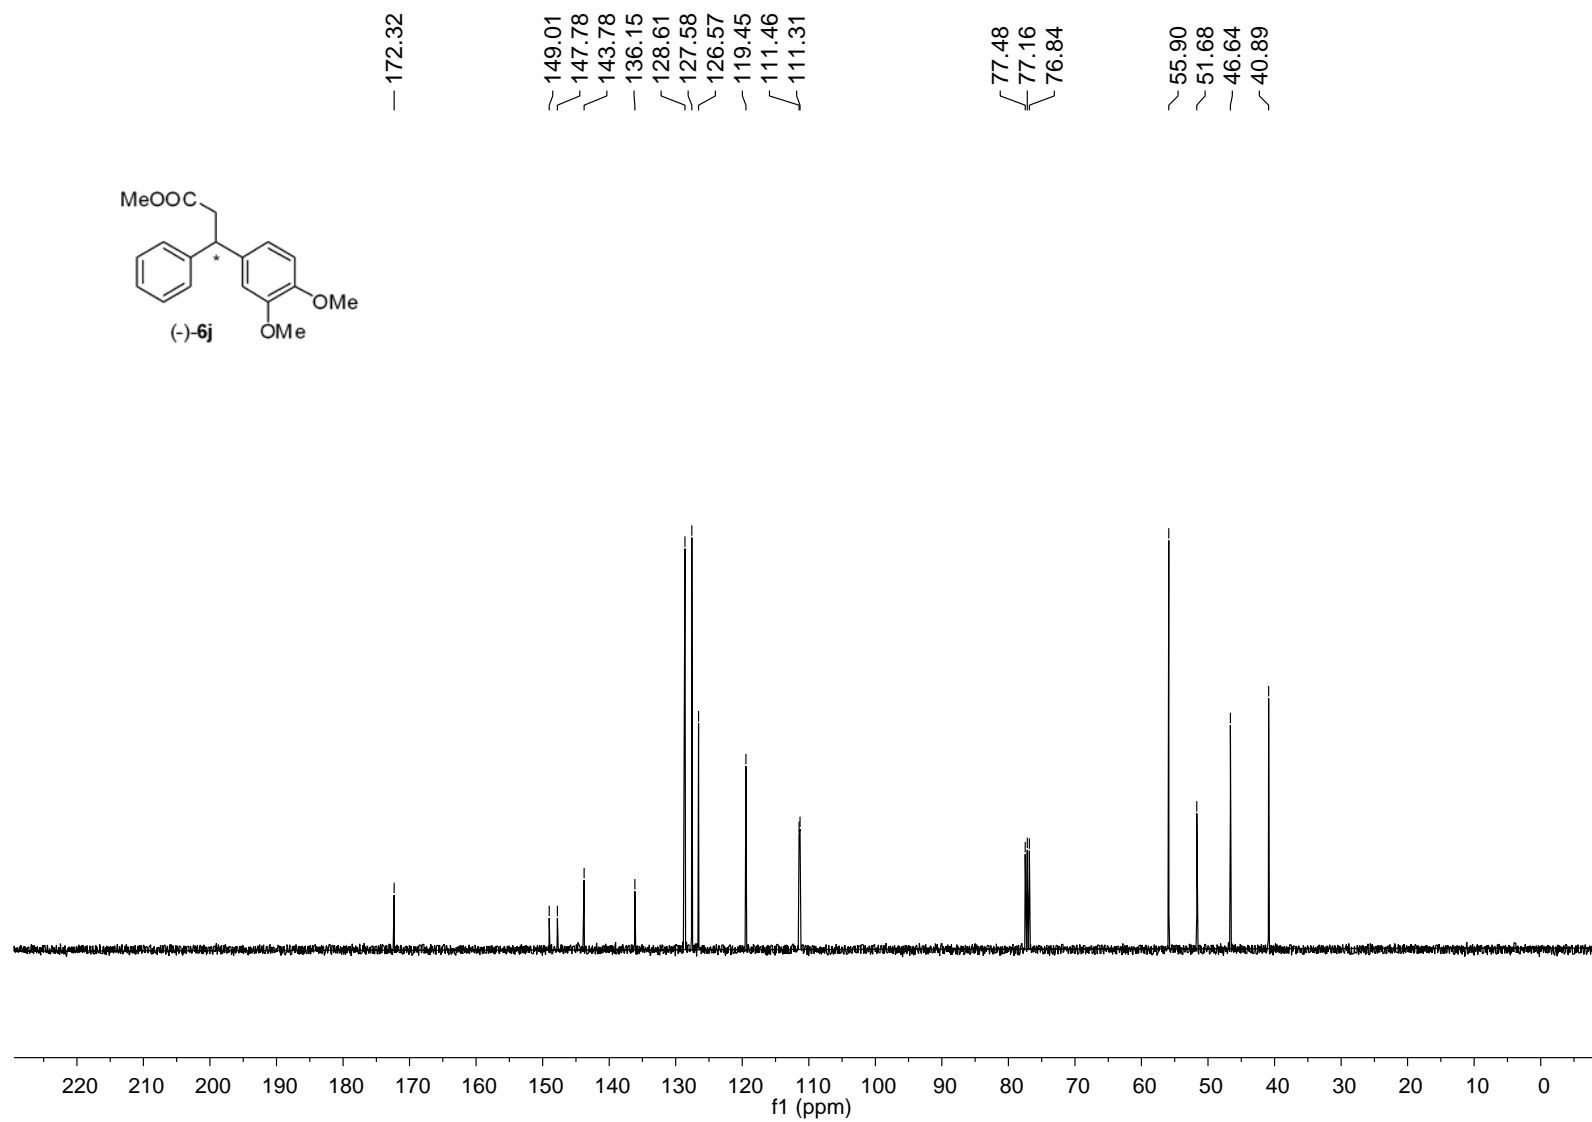

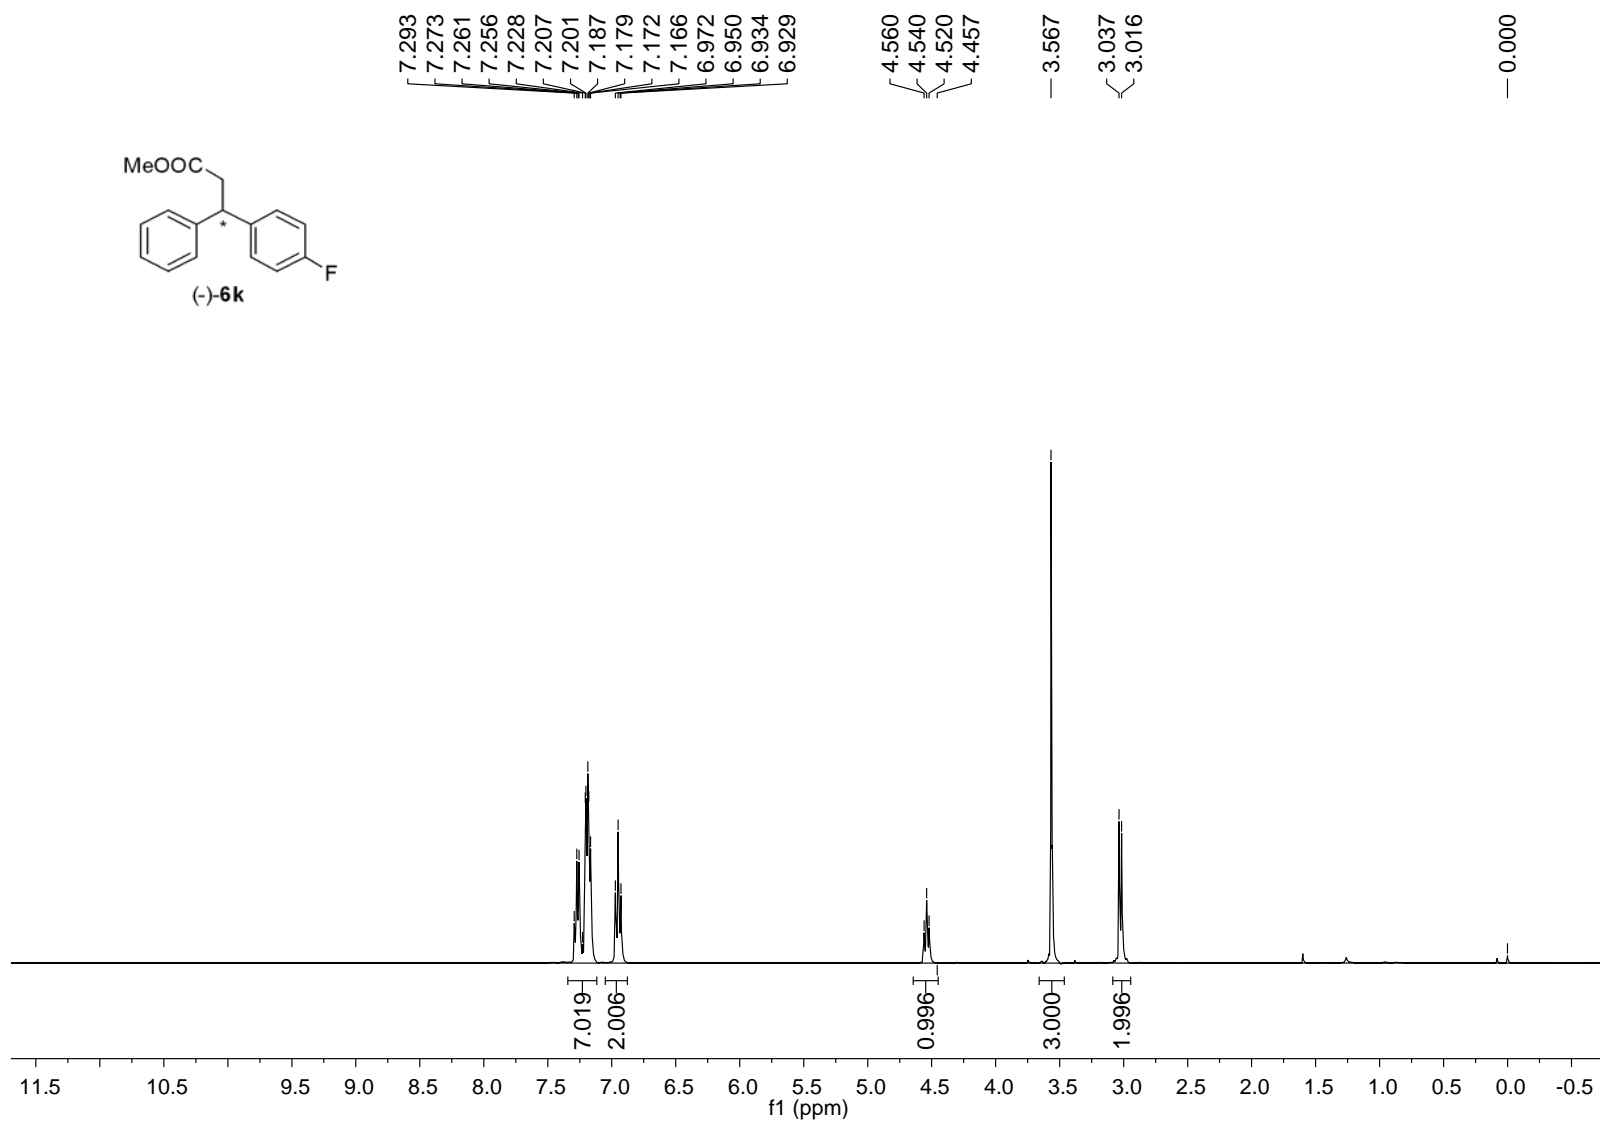

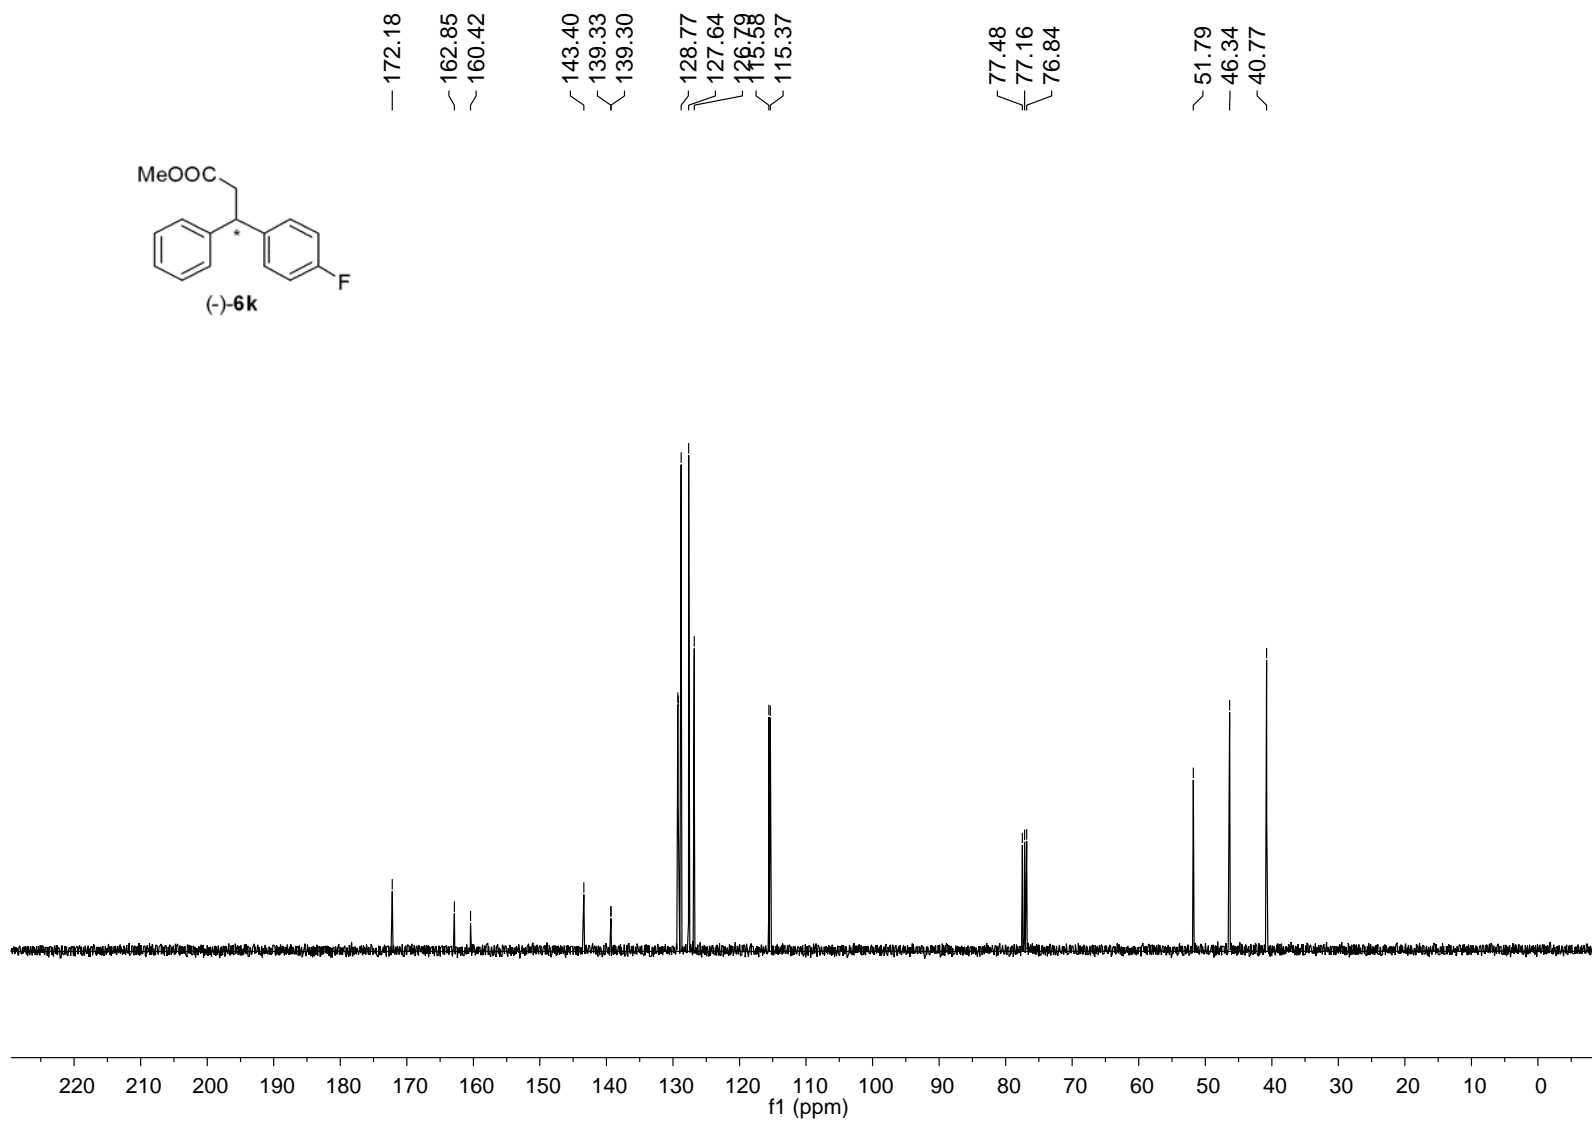

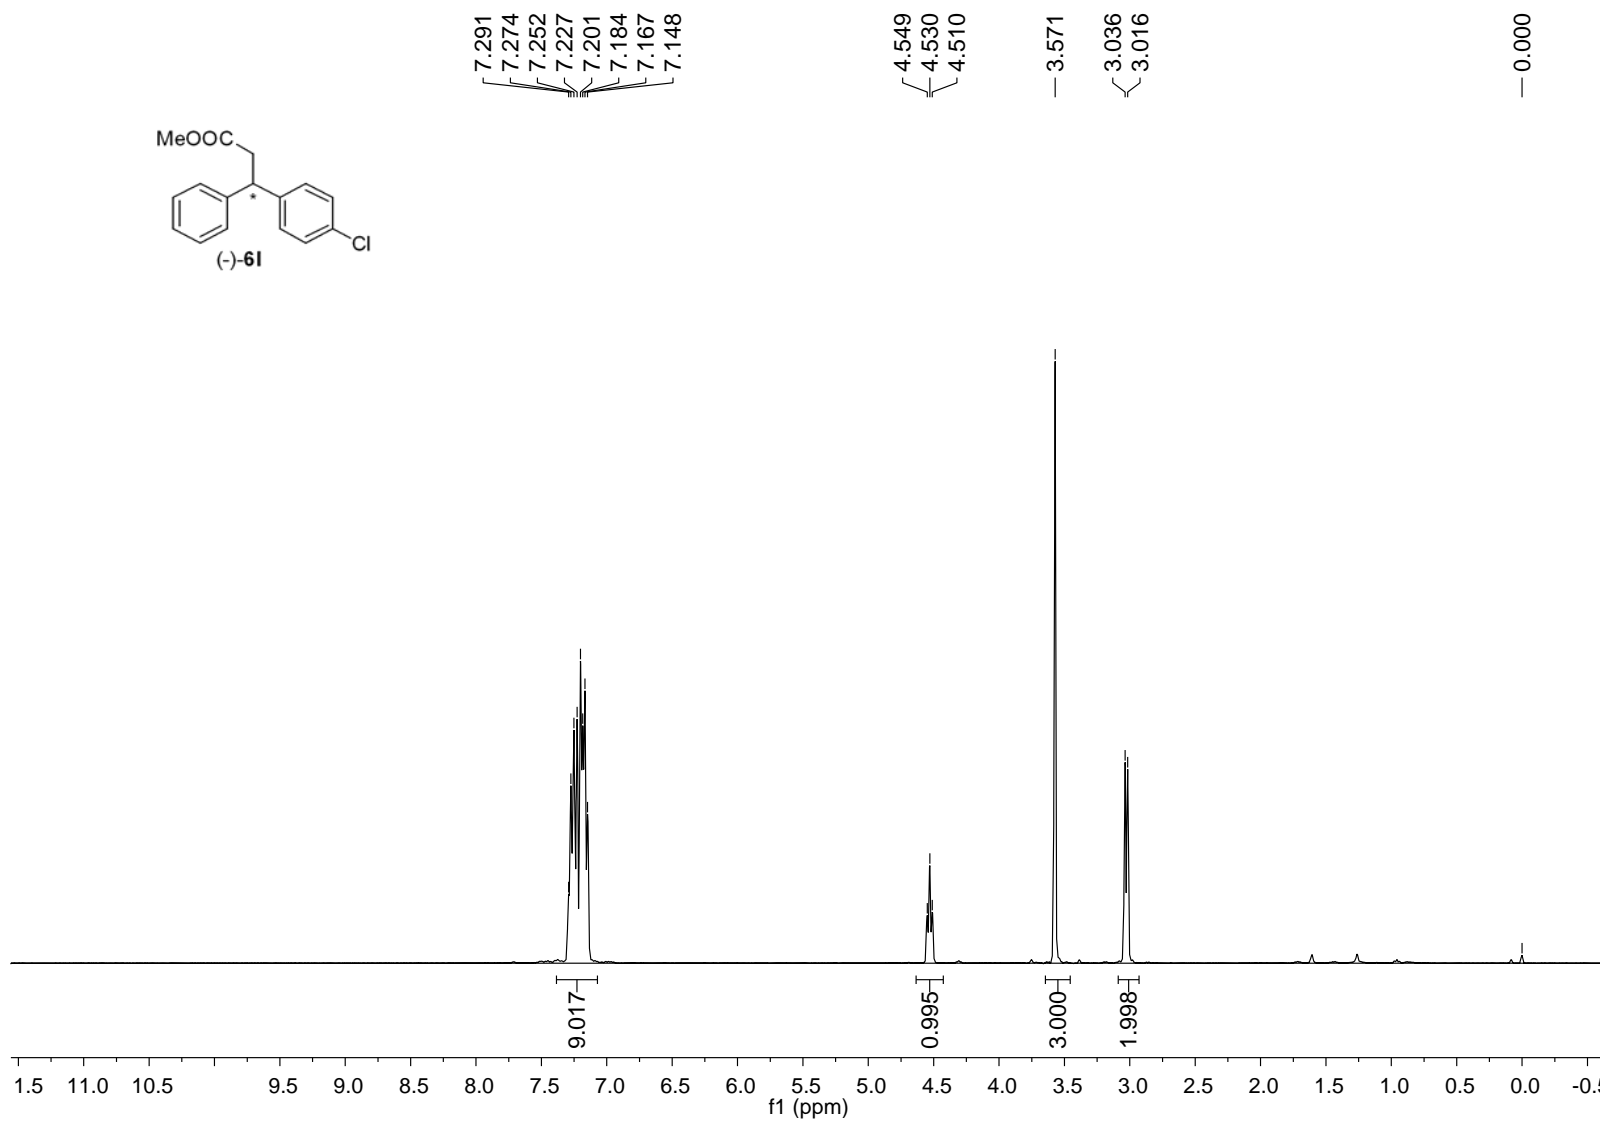



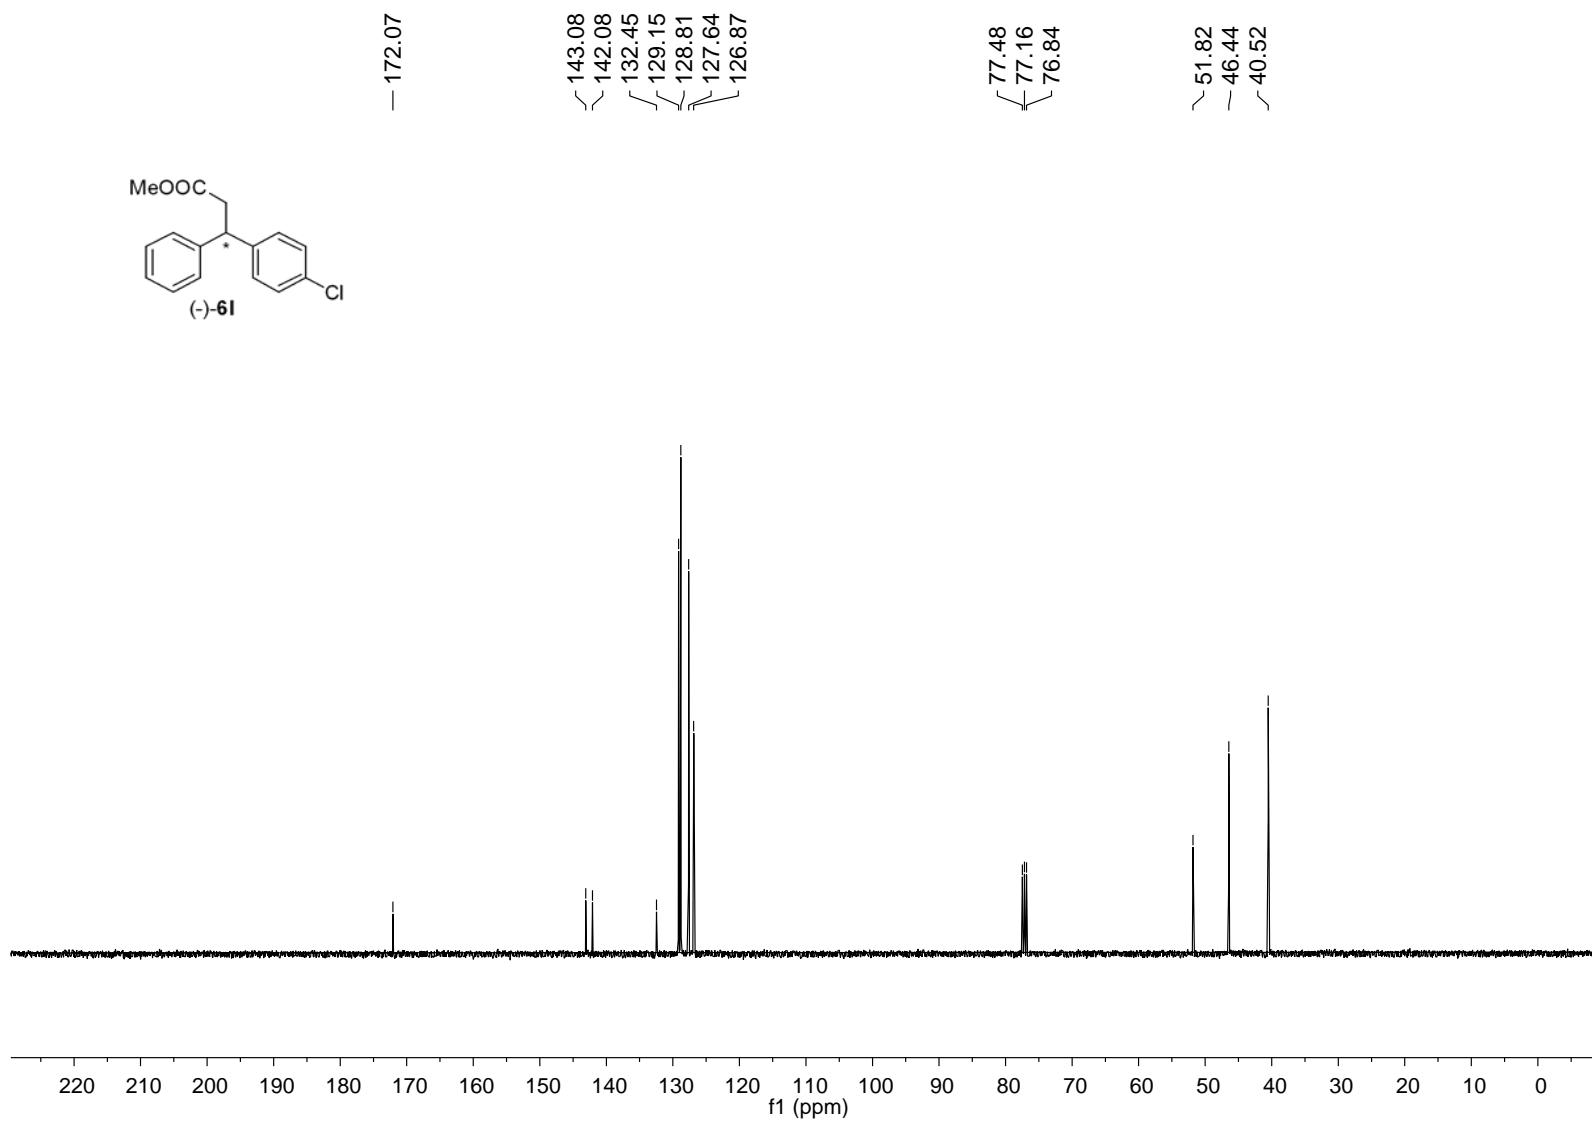

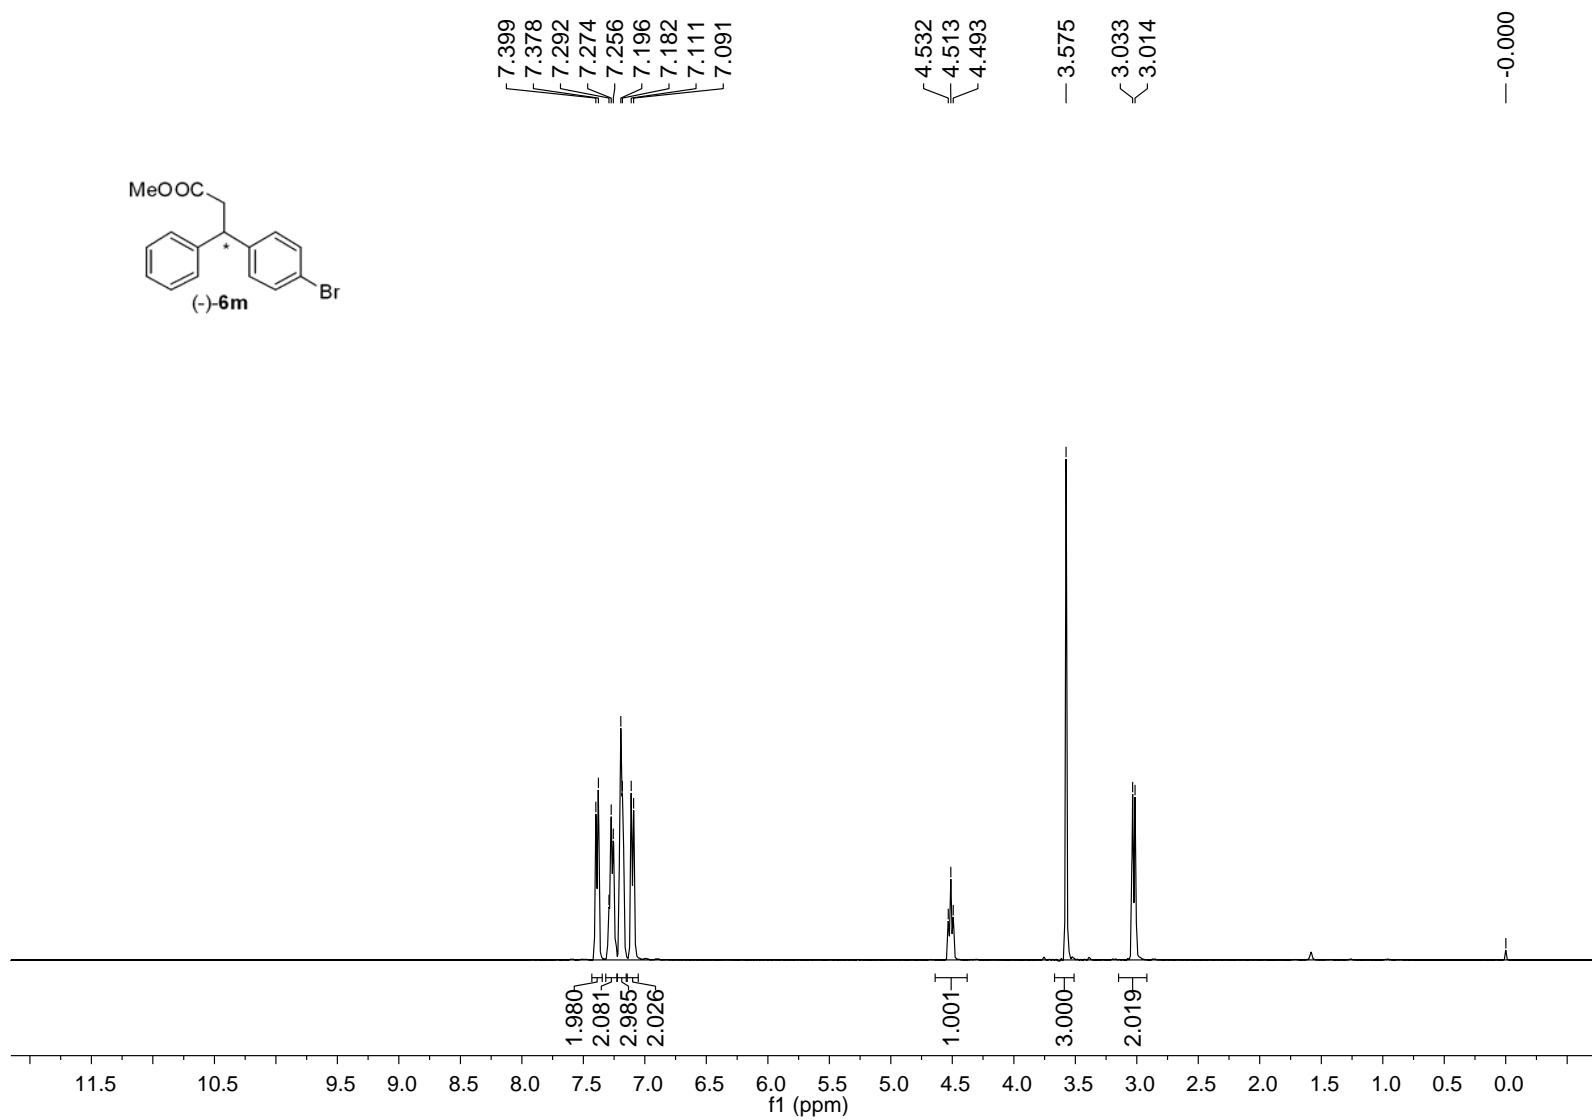

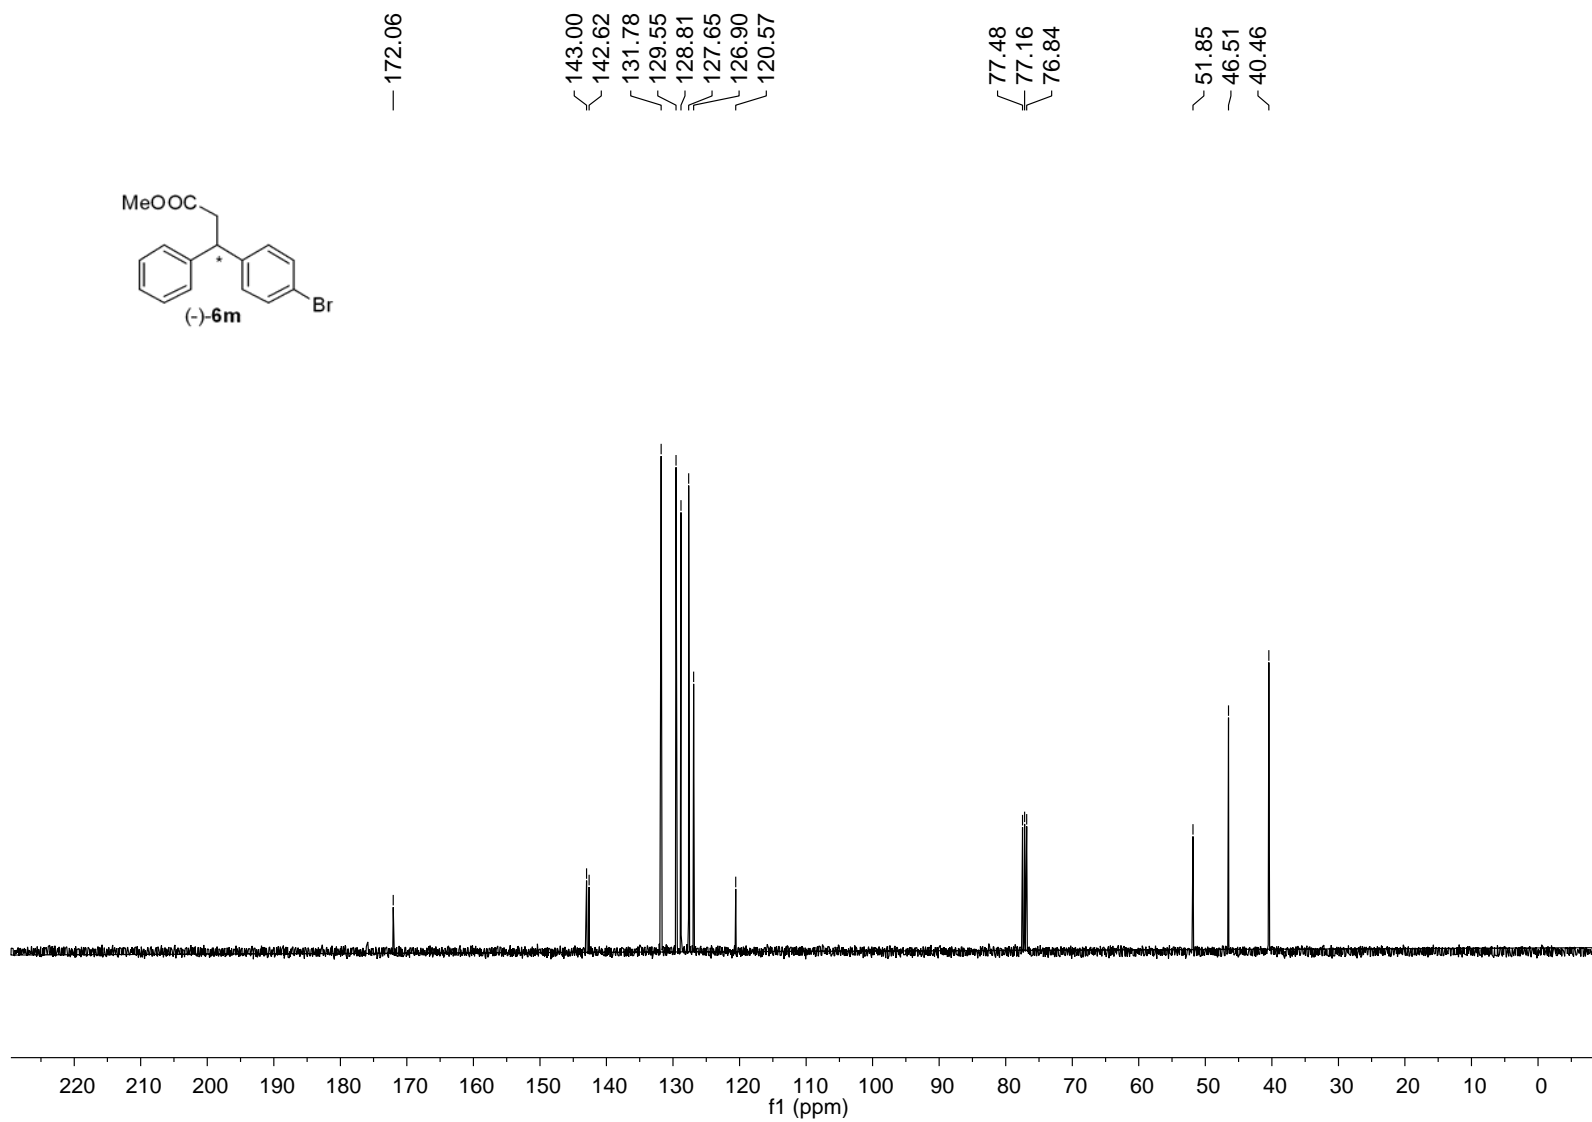

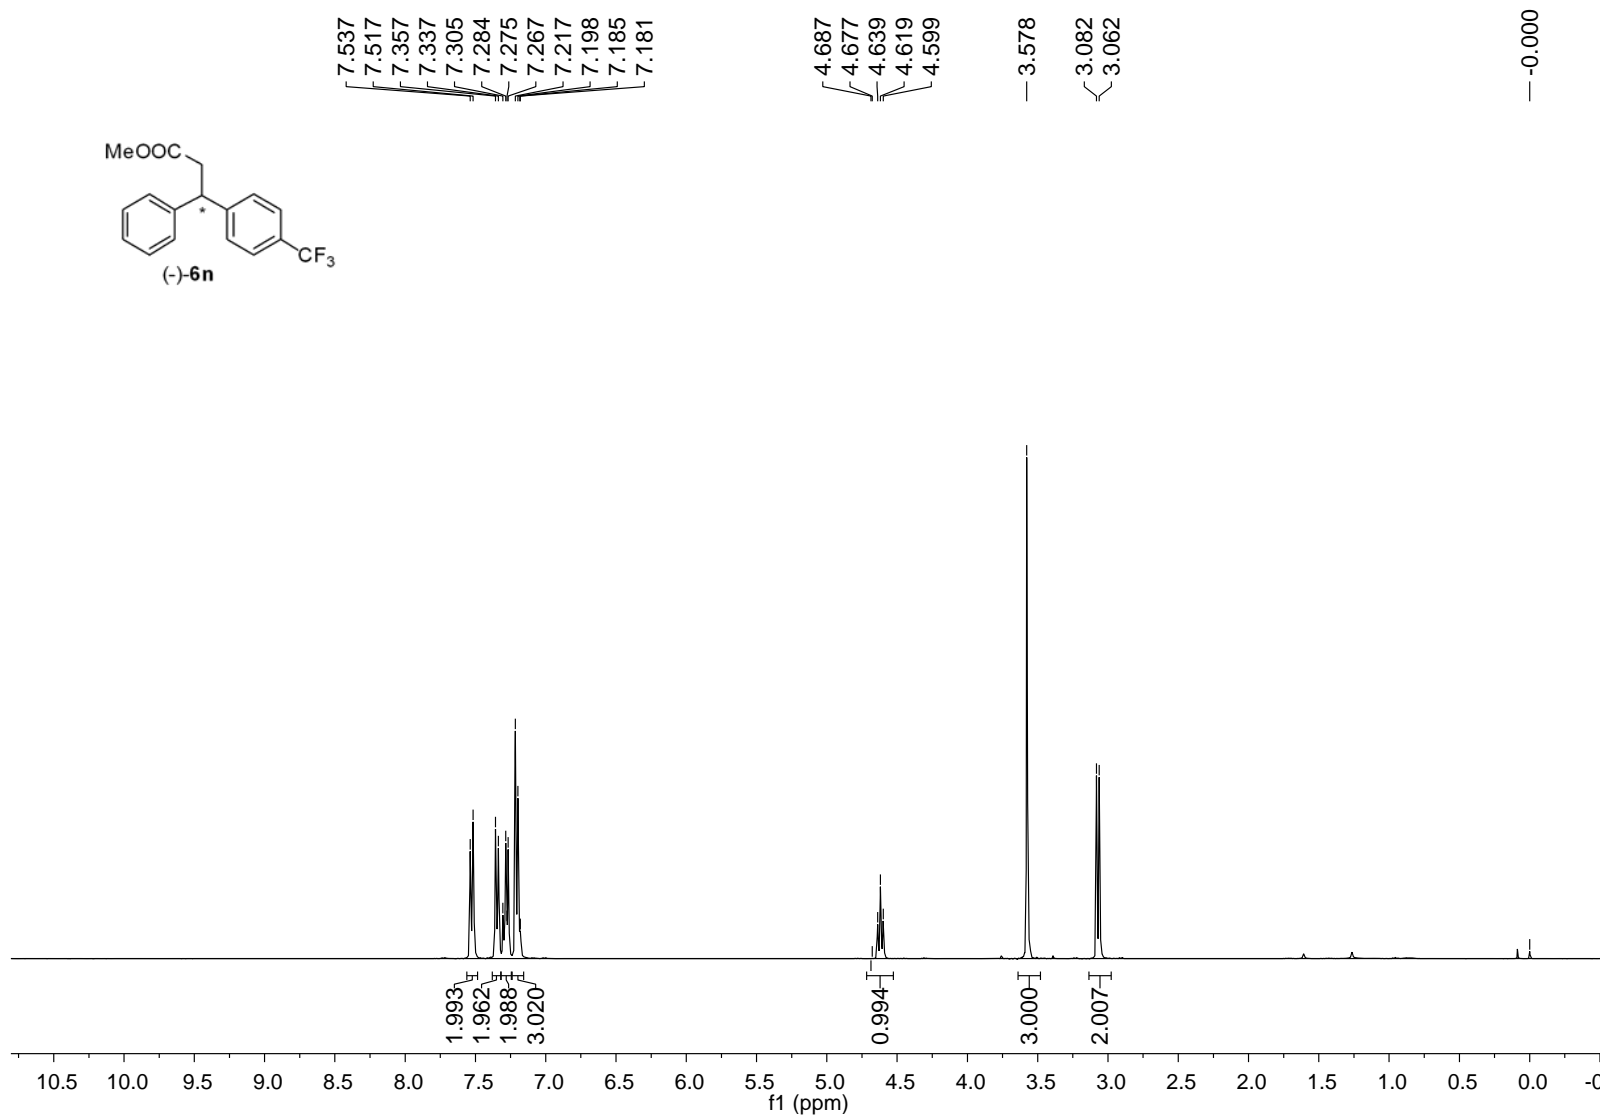

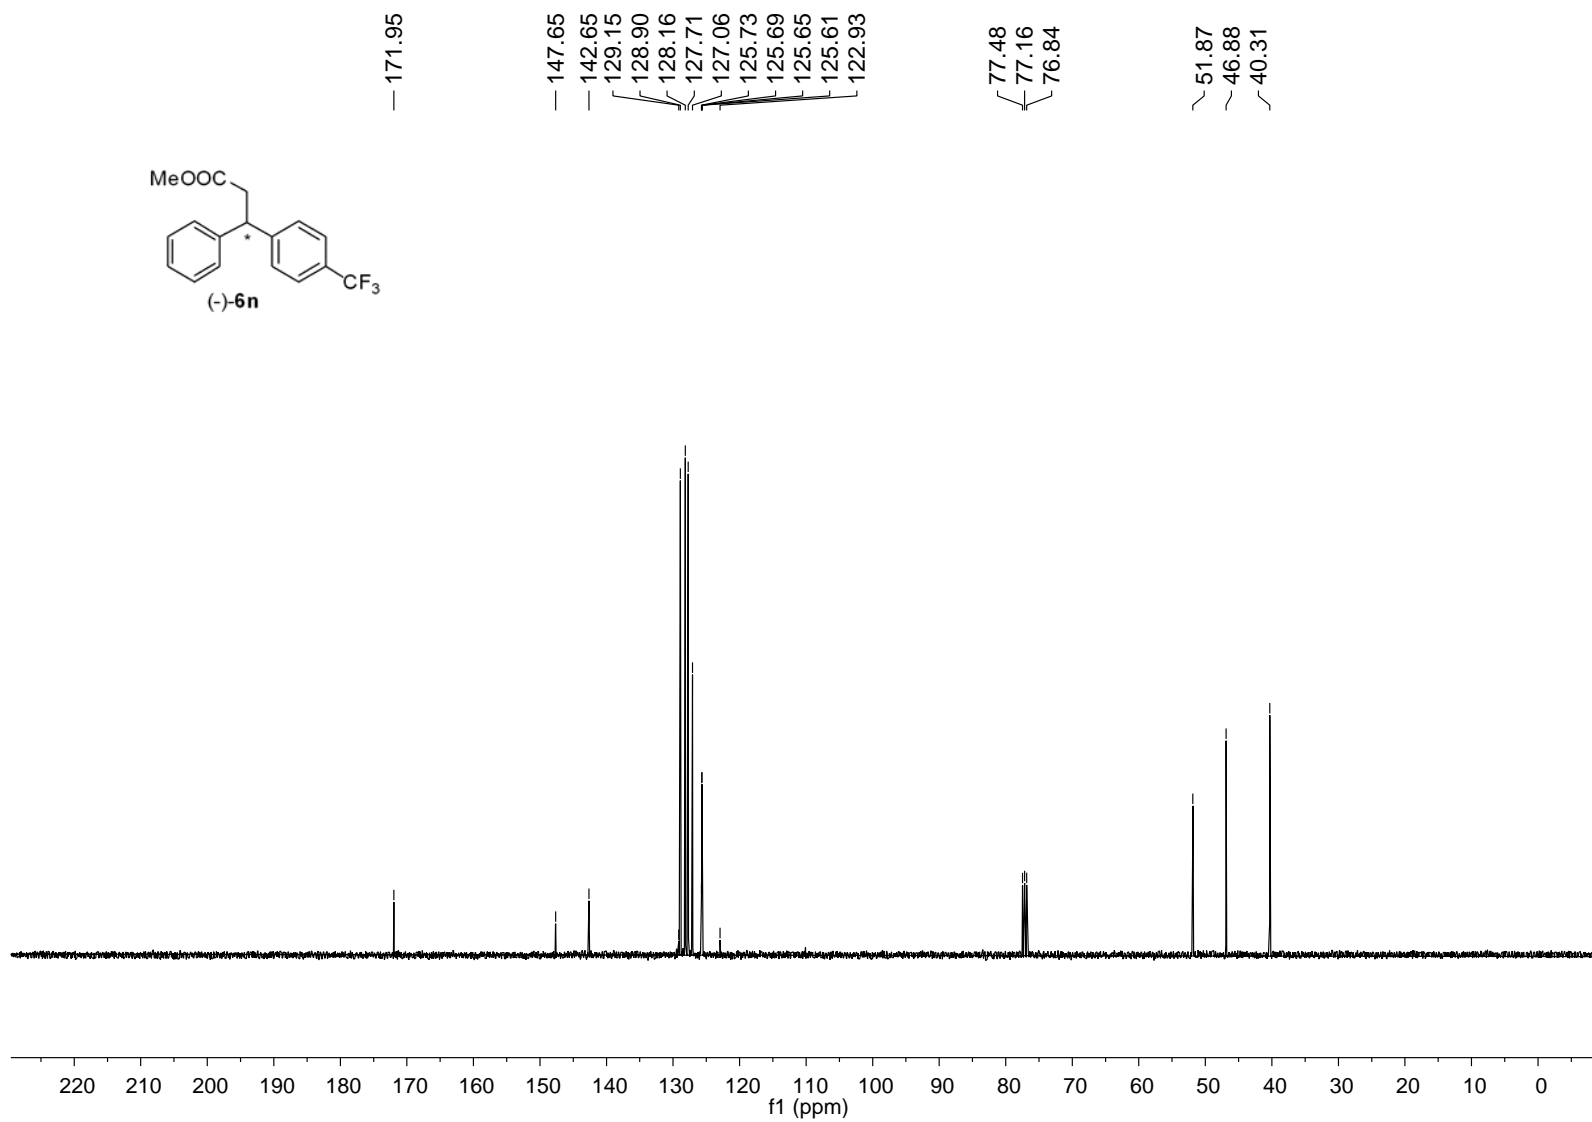

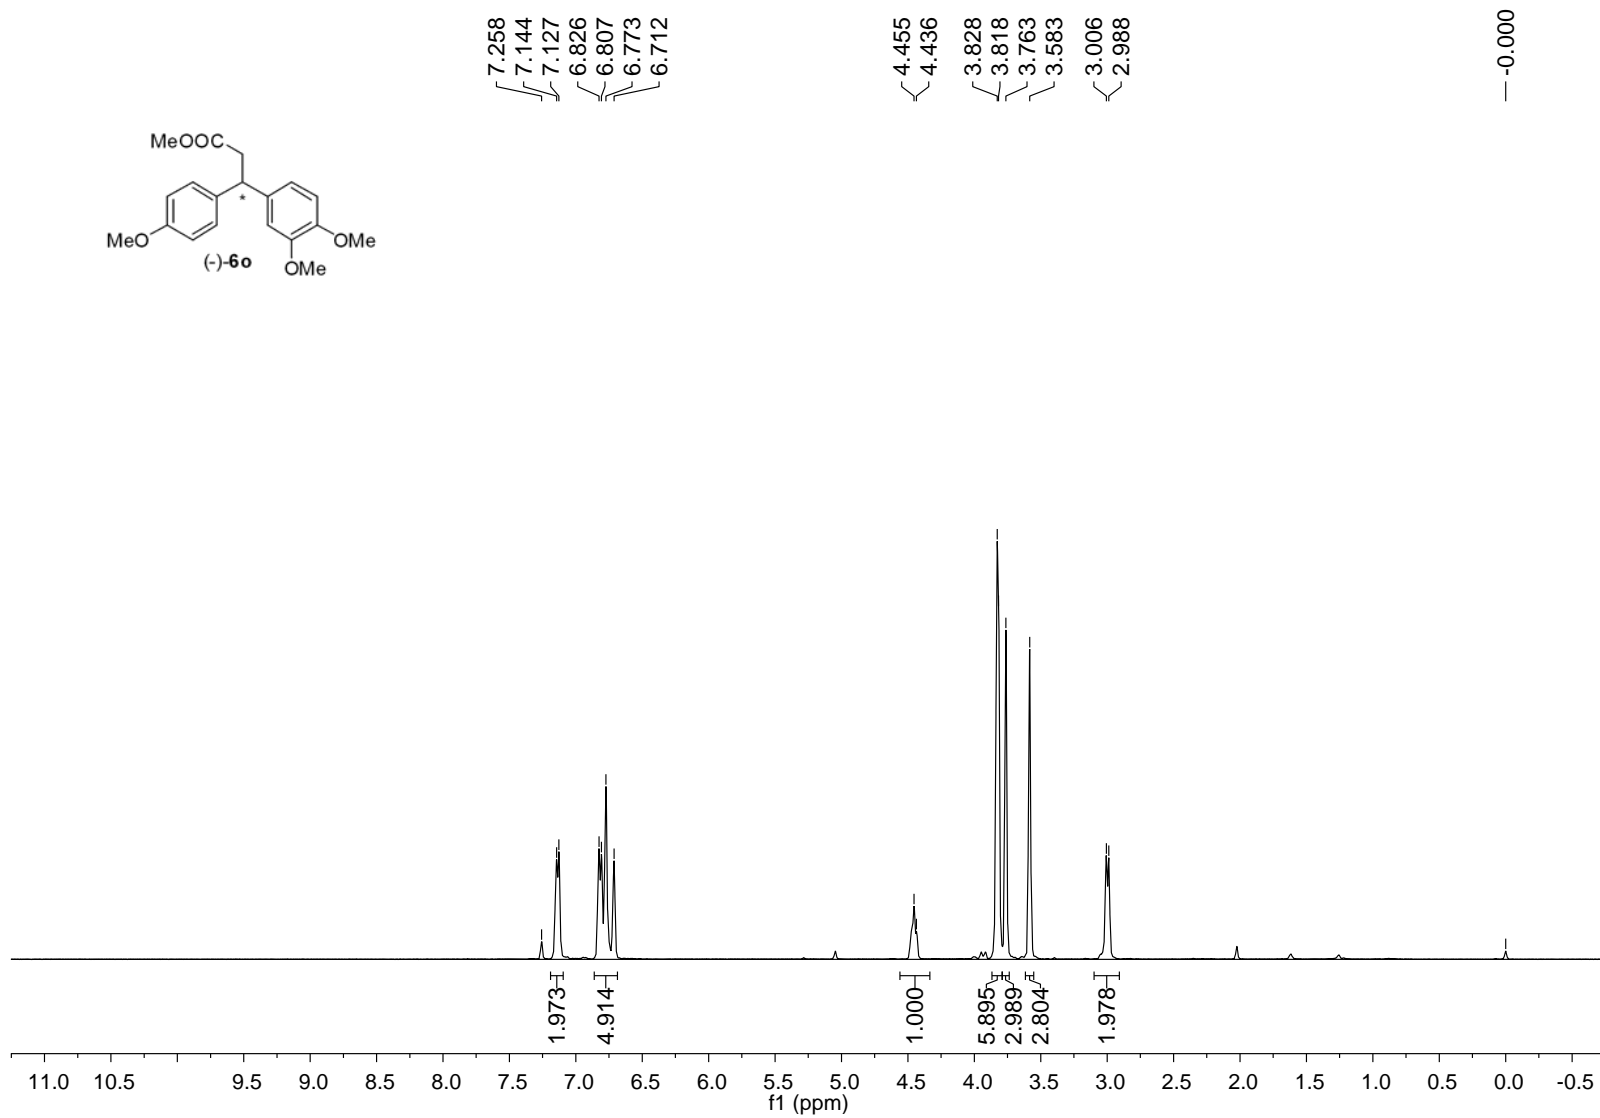

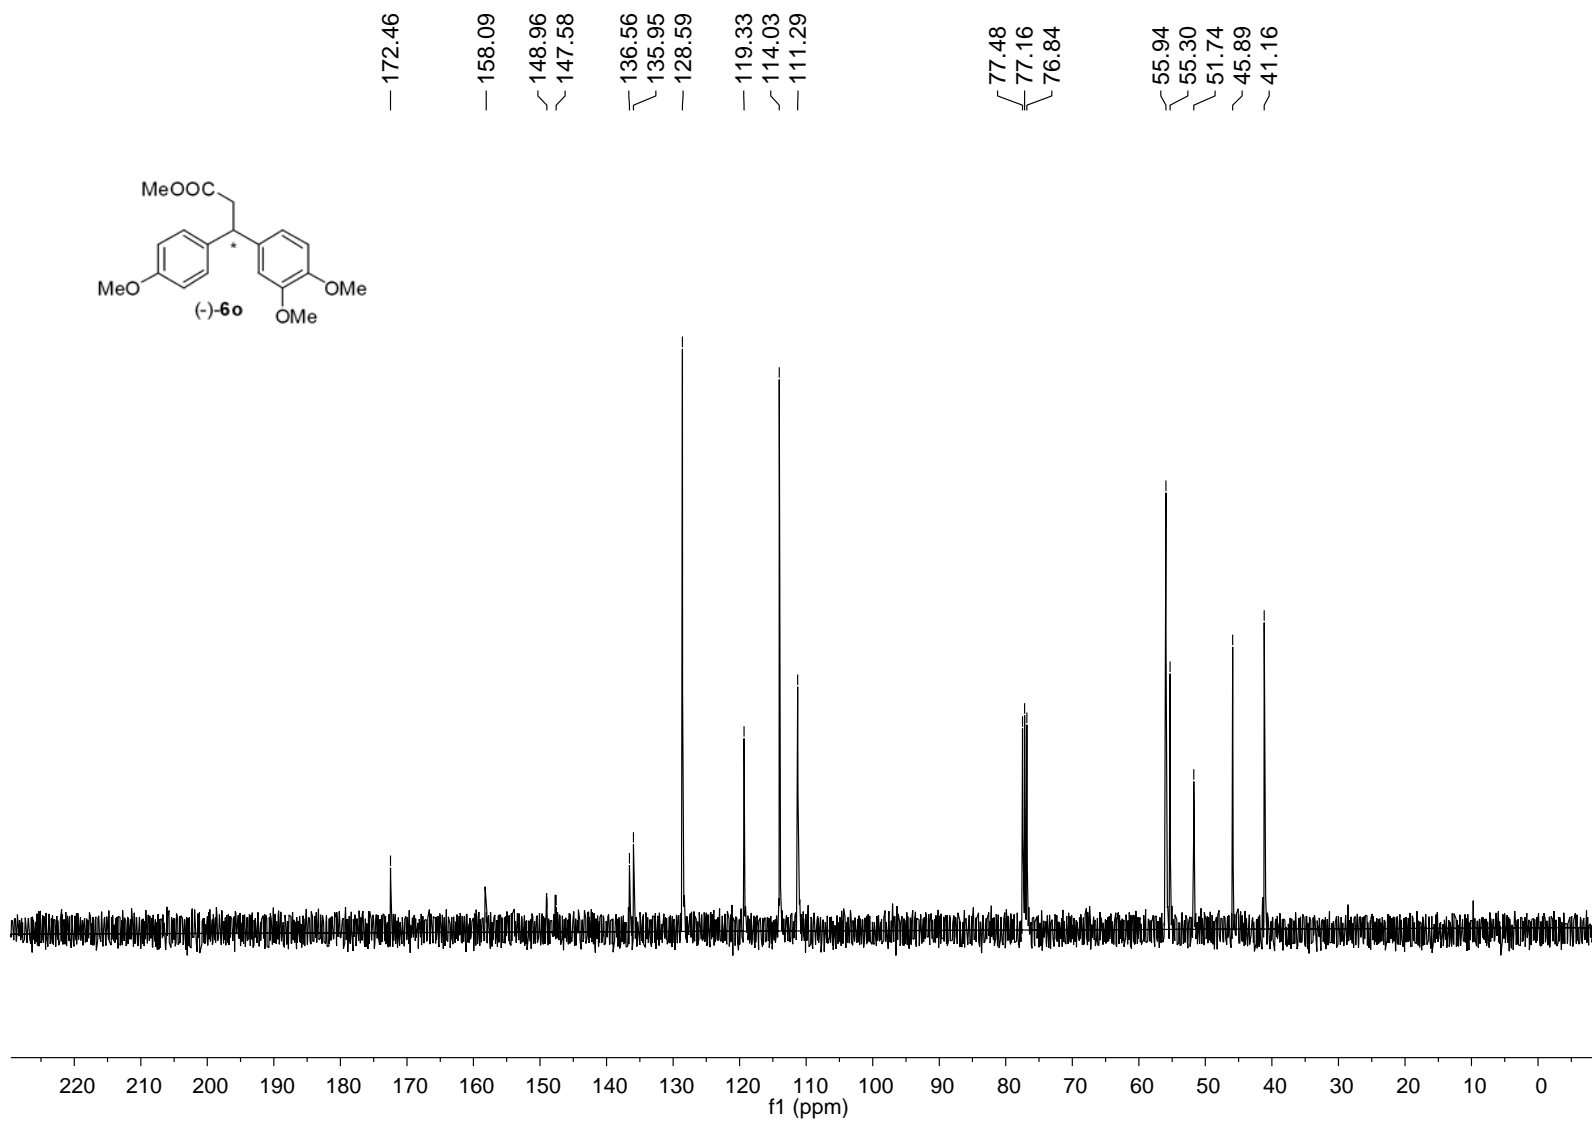

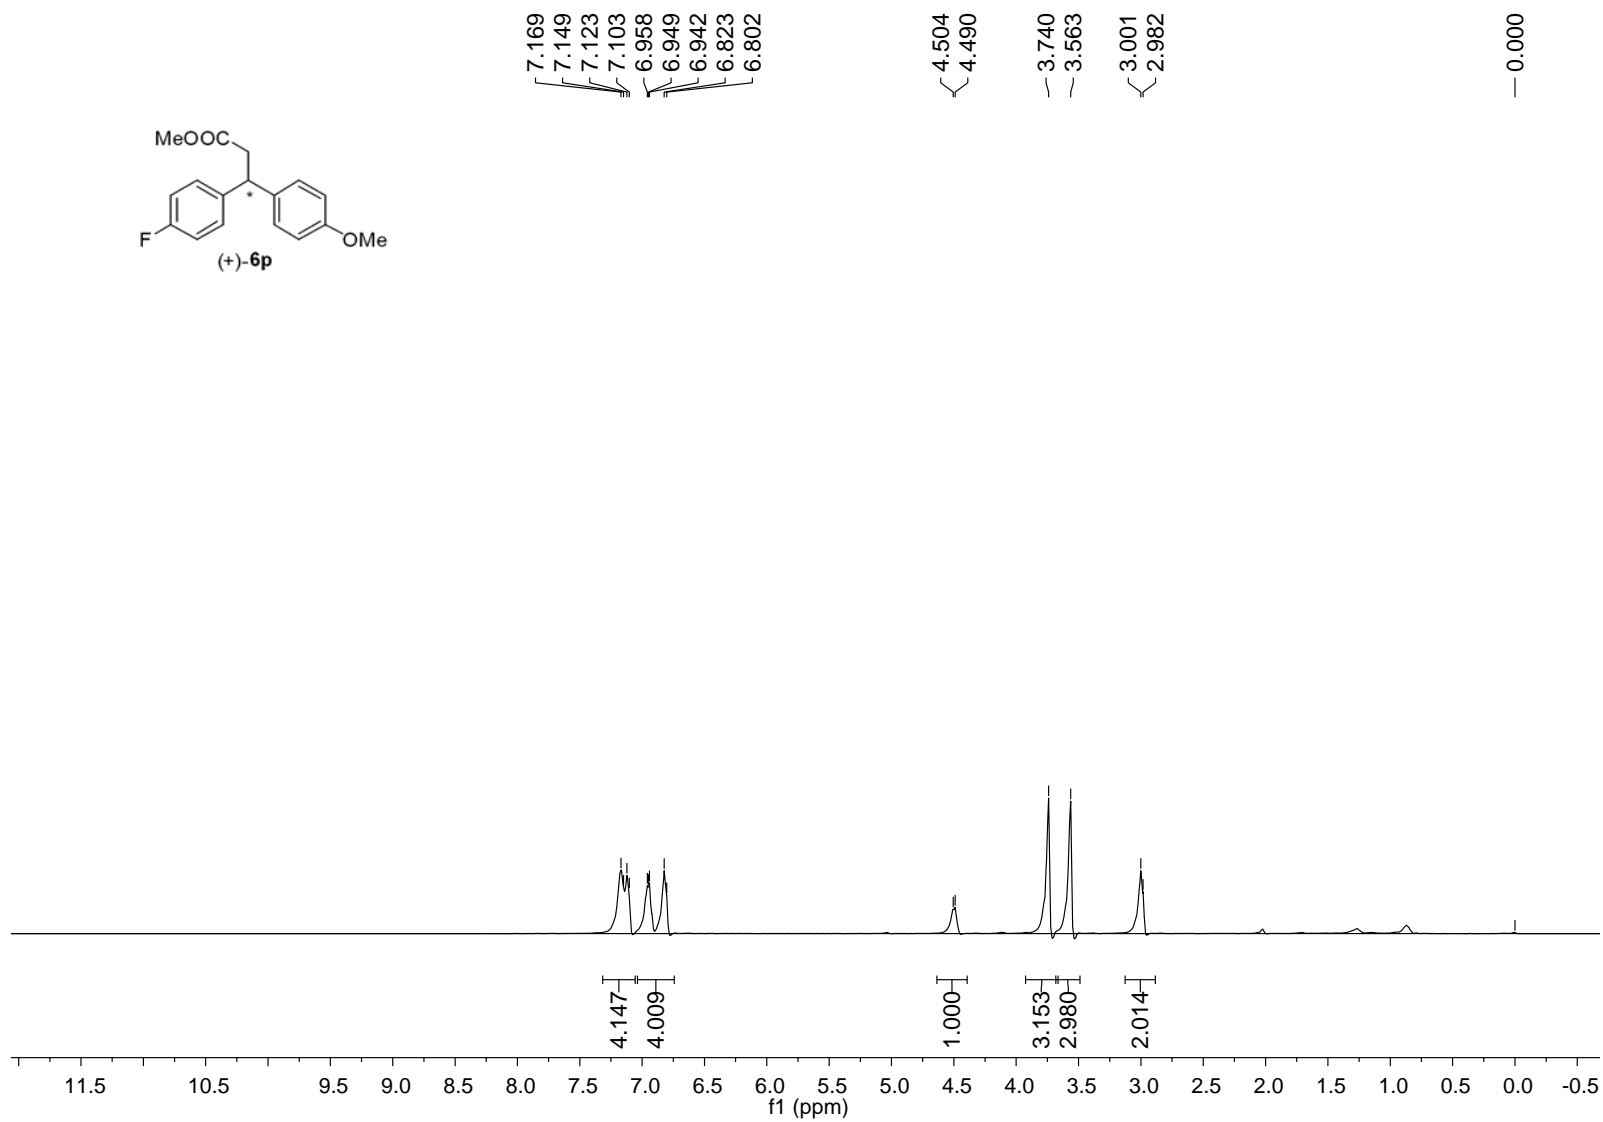



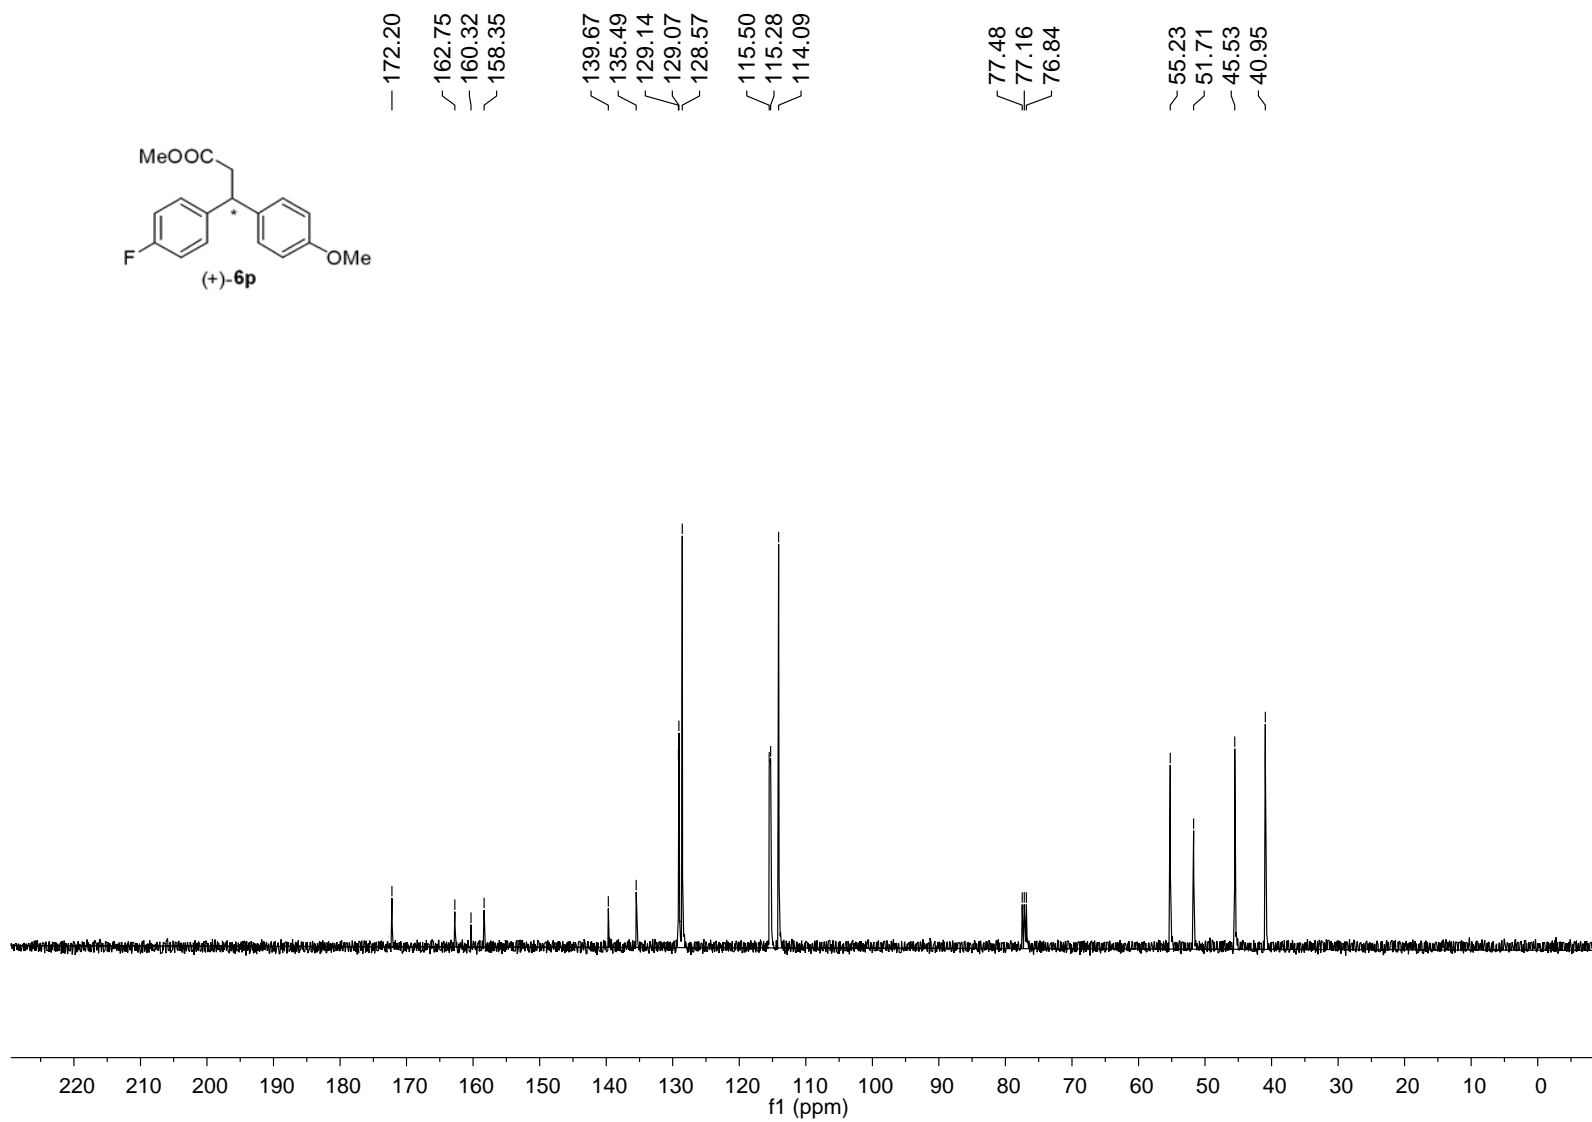

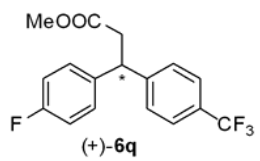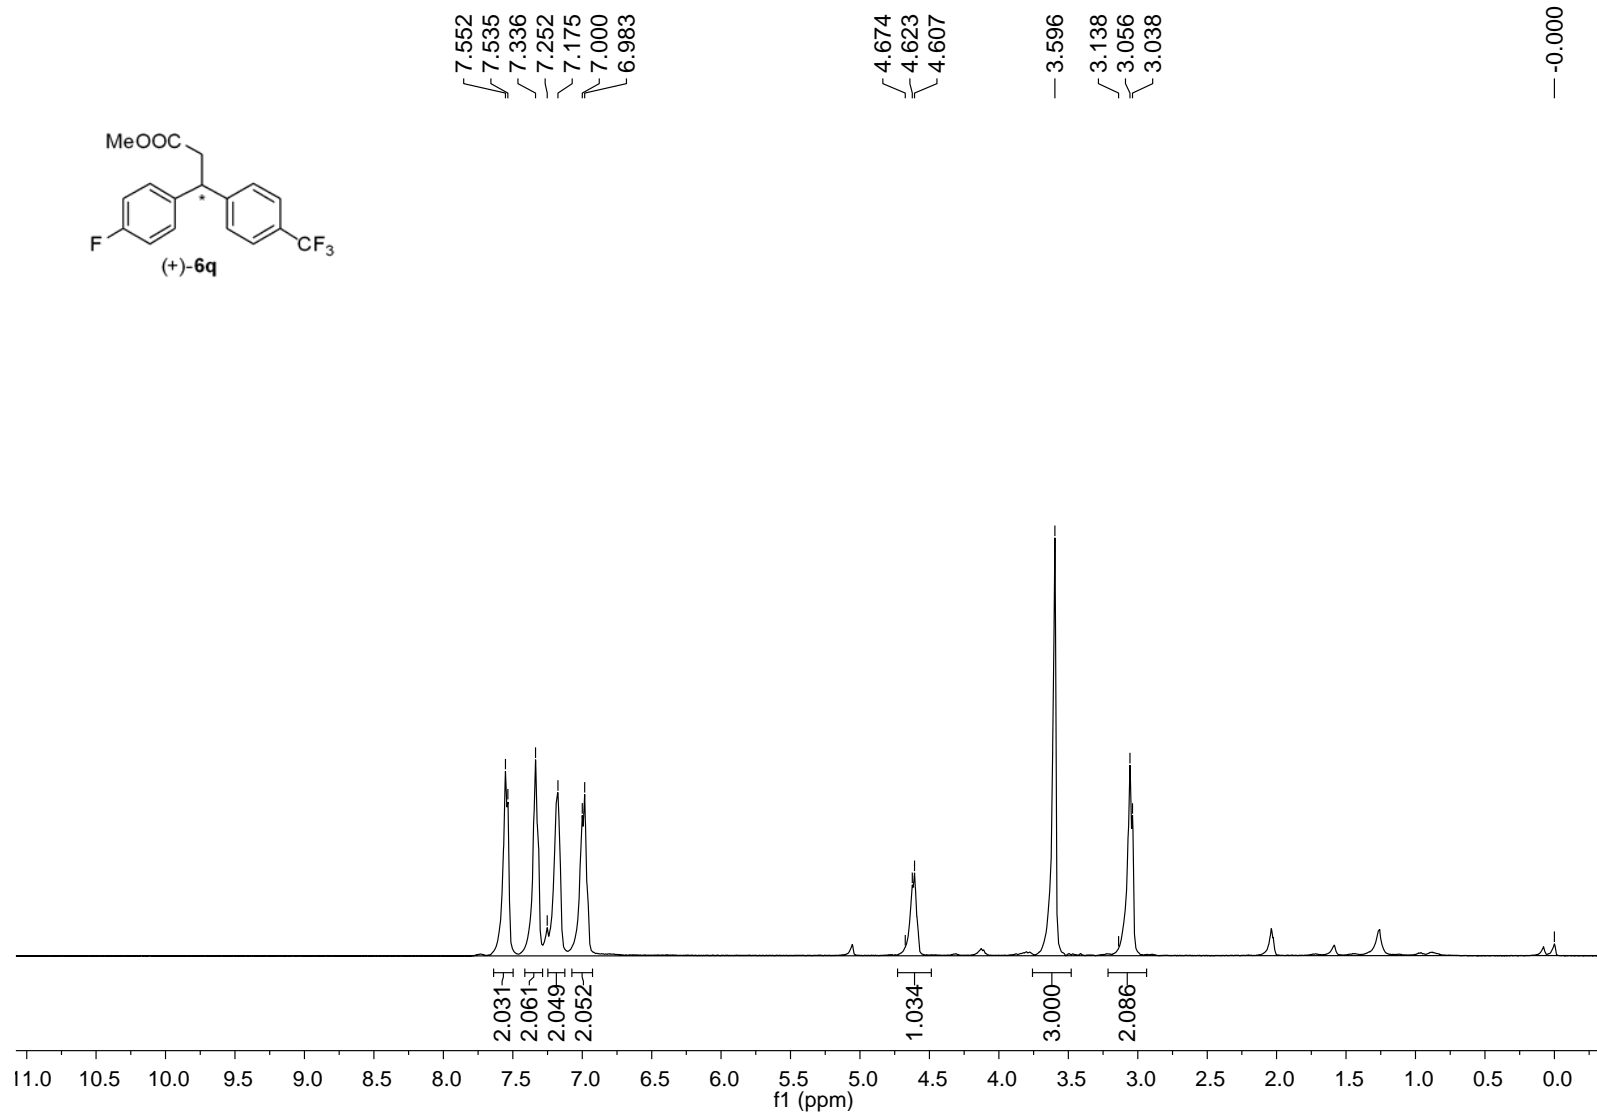

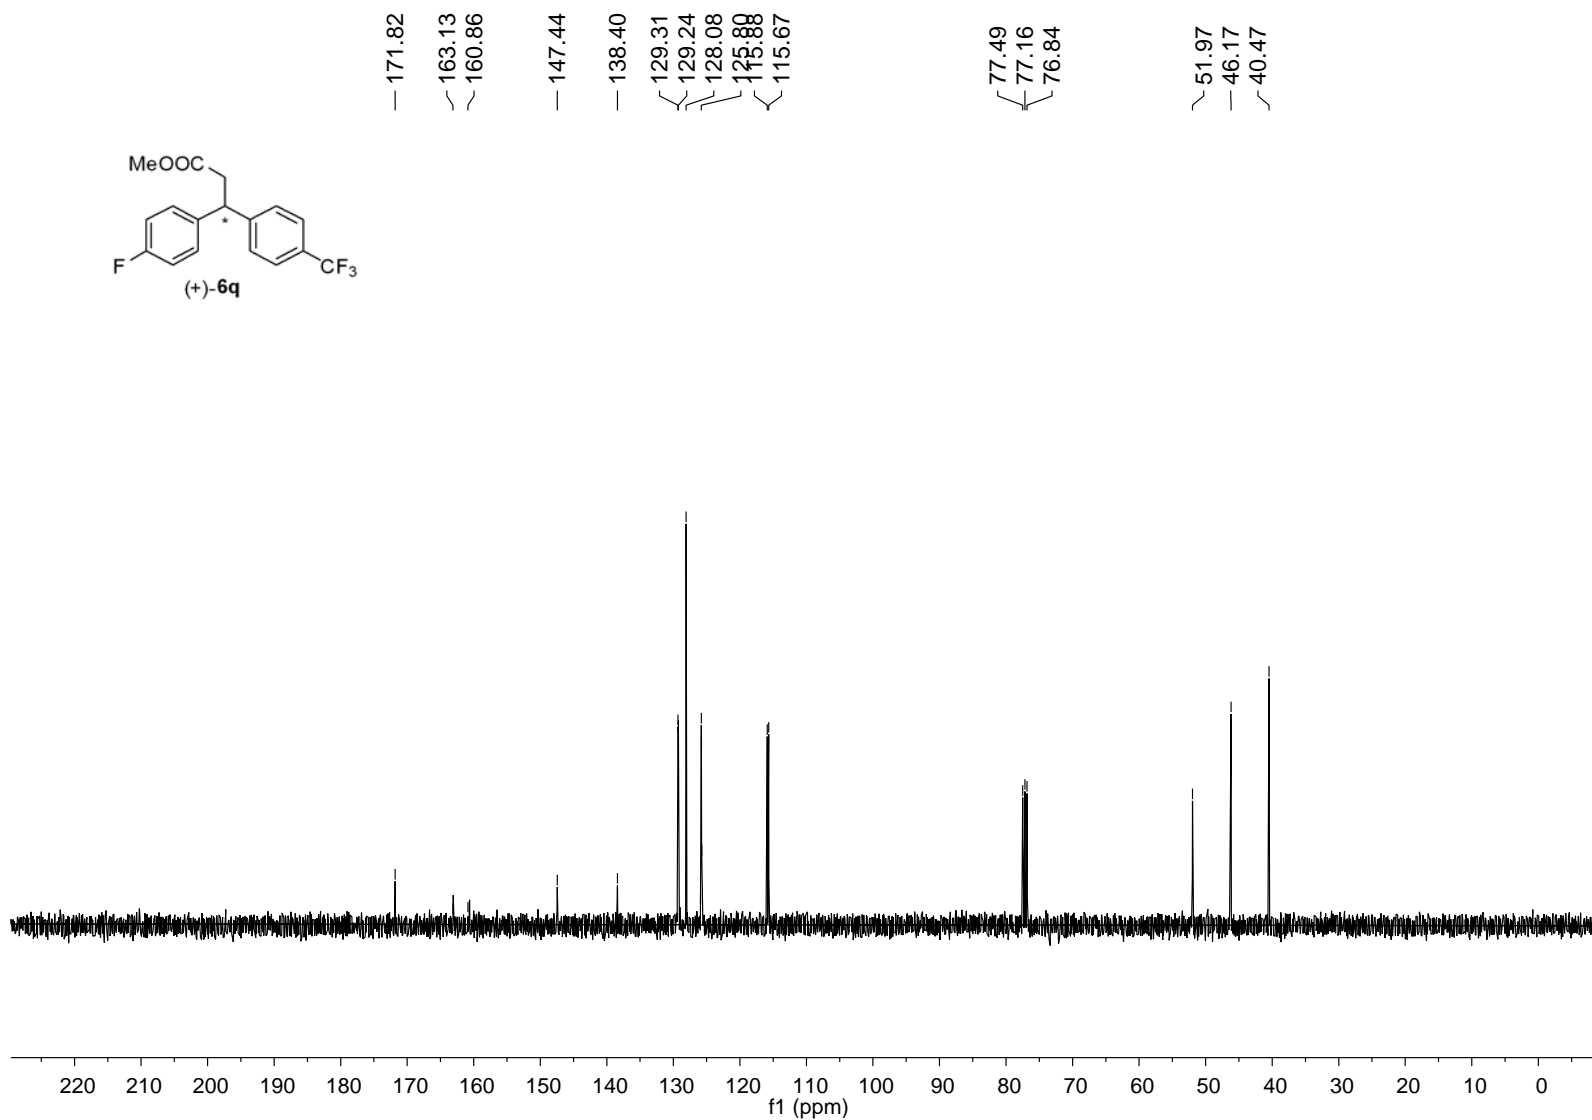

## 2. Copy of HRMS for the compounds (6a-6q).

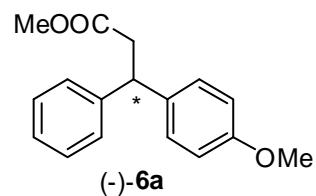

### Elemental Composition Report

Page 1

#### Single Mass Analysis (displaying only valid results)

Tolerance = 5.0 PPM / DBE: min = -200.0, max = 200.0

Selected filters: None

Monoisotopic Mass, Even Electron Ions

13 formula(e) evaluated with 1 results within limits (all results (up to 1000) for each mass)

Elements Used:

C: 0-100 H: 0-150 O: 3-3 Na: 1-1

xf-4-78

12030902 14 (0.261) AM (Cen,2, 80.00, Ht,5000.0,0.00,1.00); Sm (Mn, 2x1.00); Cm (7:14)

09:57:12  
1: TOF MS ES+  
7.14e3

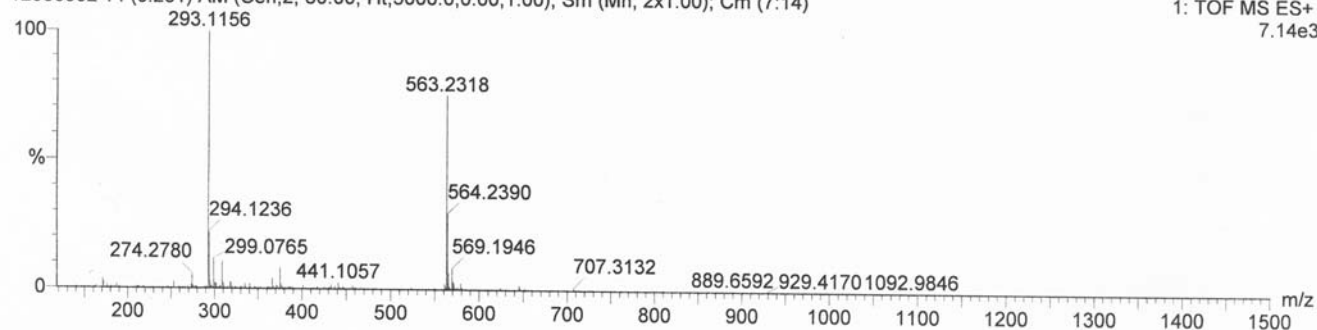

Minimum: -200.0  
Maximum: 5.0 5.0 200.0

| Mass     | Calc. Mass | mDa | PPM | DBE | i-FIT | Formula       |
|----------|------------|-----|-----|-----|-------|---------------|
| 293.1156 | 293.1154   | 0.2 | 0.7 | 8.5 | 14.8  | C17 H18 O3 Na |

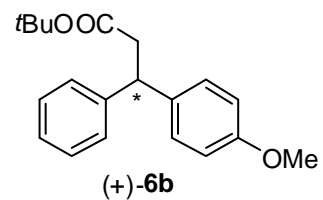

## Elemental Composition Report

Page 1

### Single Mass Analysis (displaying only valid results)

Tolerance = 5.0 PPM / DBE: min = -200.0, max = 200.0

Selected filters: None

Monoisotopic Mass, Even Electron Ions

13 formula(e) evaluated with 1 results within limits (all results (up to 1000) for each mass)

Elements Used:

C: 0-100 H: 0-150 O: 3-3 Na: 1-1

xf-4-84

12030903 23 (0.427) AM (Cen,2, 80.00, Ht,5000.0,0.00,1.00); Sm (Mn, 2x1.00); Cm (12:23)

10:17:53  
1: TOF MS ES+  
6.45e3

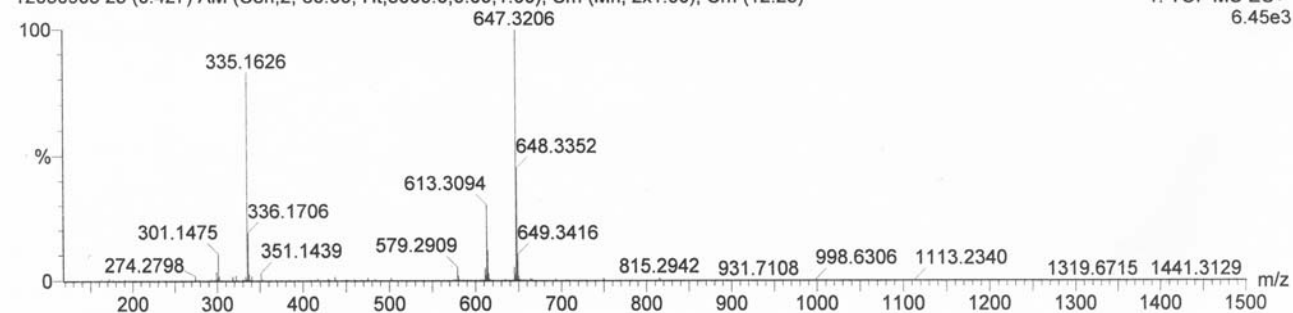

Minimum: -200.0  
Maximum: 5.0 5.0 200.0

| Mass     | Calc. Mass | mDa | PPM | DBE | i-FIT | Formula       |
|----------|------------|-----|-----|-----|-------|---------------|
| 335.1626 | 335.1623   | 0.3 | 0.9 | 8.5 | 1.3   | C20 H24 O3 Na |

## Elemental Composition Report

### Single Mass Analysis (displaying only valid results)

Tolerance = 5.0 PPM / DBE: min = -200.0, max = 200.0

Selected filters: None

Monoisotopic Mass, Even Electron Ions

12 formula(e) evaluated with 1 results within limits (all results (up to 1000) for each mass)

Elements Used:

C: 0-100 H: 0-150 O: 3-3 Na: 1-1

xf-4-85

12030904 25 (0.465) AM (Cen,2, 80.00, Ht,5000.0,0.00,1.00); Sm (Mn, 2x1.00); Cm (22:29)

10:24:08  
1: TOF MS ES+  
2.02e4

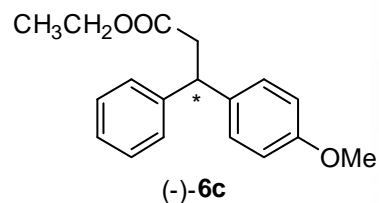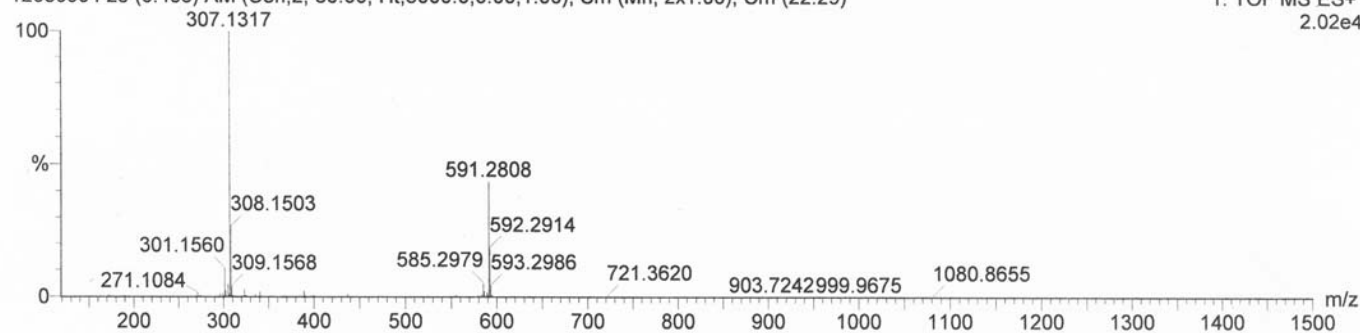

Minimum: -200.0  
Maximum: 5.0 5.0 200.0

| Mass     | Calc. Mass | mDa | PPM | DBE | i-FIT | Formula       |
|----------|------------|-----|-----|-----|-------|---------------|
| 307.1317 | 307.1310   | 0.7 | 2.3 | 8.5 | 206.5 | C18 H20 O3 Na |

## Elemental Composition Report

Page 1

### Single Mass Analysis (displaying only valid results)

Tolerance = 5.0 PPM / DBE: min = -200.0, max = 200.0

Selected filters: None

Monoisotopic Mass, Even Electron Ions

12 formula(e) evaluated with 1 results within limits (all results (up to 1000) for each mass)

Elements Used:

C: 0-100 H: 0-150 O: 3-3 Na: 1-1

xf-4-86

12030905 17 (0.316) AM (Cen,2, 80.00, Ht,5000.0,0.00,1.00); Sm (Mn, 2x1.00); Cm (14:20)

12:59:33  
1: TOF MS ES+  
4.49e3

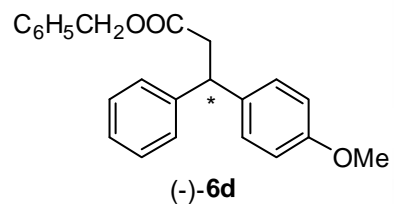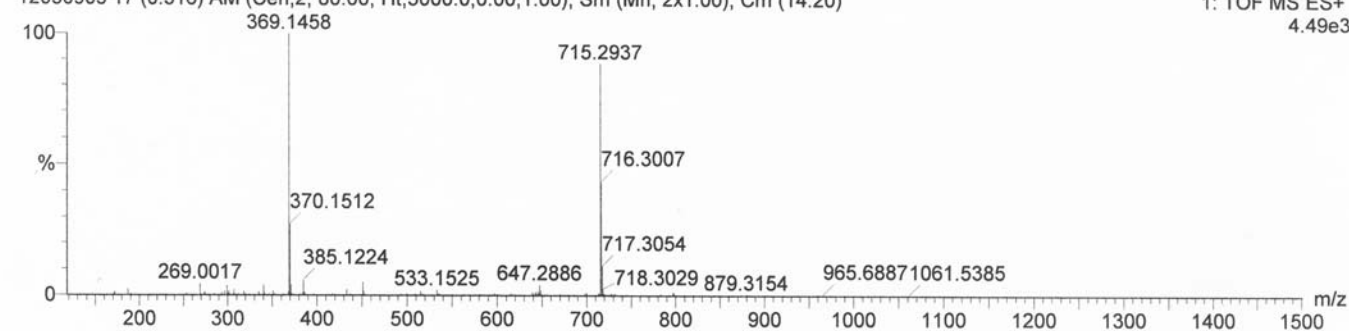

Minimum: -200.0  
Maximum: 5.0 5.0 200.0

| Mass     | Calc. Mass | mDa  | PPM  | DBE  | i-FIT | Formula       |
|----------|------------|------|------|------|-------|---------------|
| 369.1458 | 369.1467   | -0.9 | -2.4 | 12.5 | 1.1   | C23 H22 O3 Na |

## Elemental Composition Report

Page 1

### Single Mass Analysis (displaying only valid results)

Tolerance = 5.0 PPM / DBE: min = -200.0, max = 200.0

Selected filters: None

Monoisotopic Mass, Even Electron Ions

13 formula(e) evaluated with 1 results within limits (all results (up to 1000) for each mass)

Elements Used:

C: 0-100 H: 0-150 O: 3-3 Na: 1-1

xf-4-87A

12030906 75 (1.395) AM (Cen,2, 80.00, Ht,5000.0,0.00,1.00); Sm (Mn, 2x1.00); Cm (72:82)

13:03:18  
1: TOF MS ES+  
1.18e4

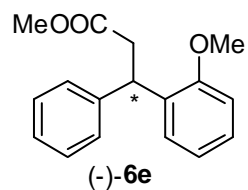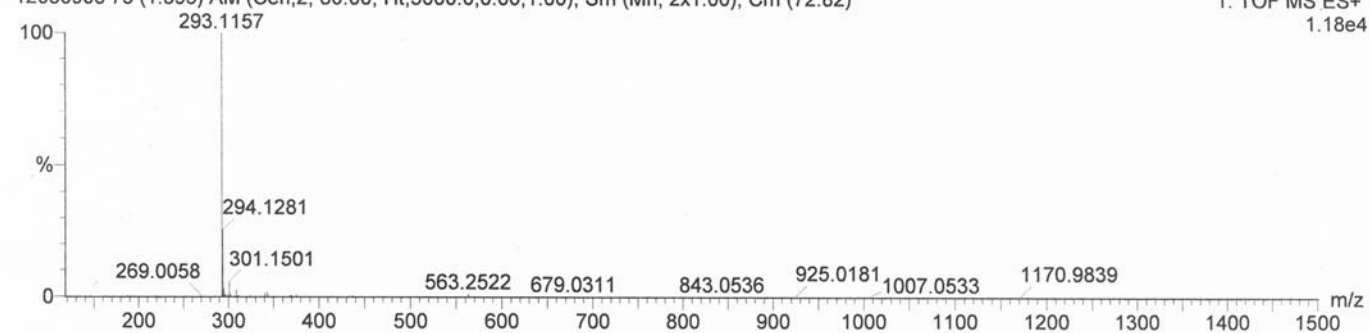

Minimum: -200.0  
Maximum: 5.0 5.0 200.0

| Mass     | Calc. Mass | mDa | PPM | DBE | i-FIT | Formula       |
|----------|------------|-----|-----|-----|-------|---------------|
| 293.1157 | 293.1154   | 0.3 | 1.0 | 8.5 | 99.6  | C17 H18 O3 Na |



## Elemental Composition Report

Page 1

### Single Mass Analysis (displaying only valid results)

Tolerance = 5.0 PPM / DBE: min = -200.0, max = 200.0

Selected filters: None

Monoisotopic Mass, Even Electron Ions

13 formula(e) evaluated with 1 results within limits (all results (up to 1000) for each mass)

Elements Used:

C: 0-100 H: 0-150 O: 2-2 Na: 1-1

xf-4-87B

12030907 51 (0.948) AM (Cen,2, 80.00, Ht,5000.0,0.00,1.00); Sm (Mn, 2x1.00); Cm (30:54)

13:08:33  
1: TOF MS ES+  
4.14e3

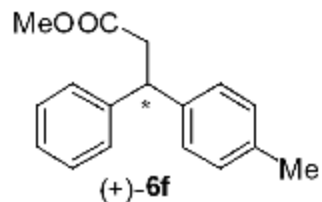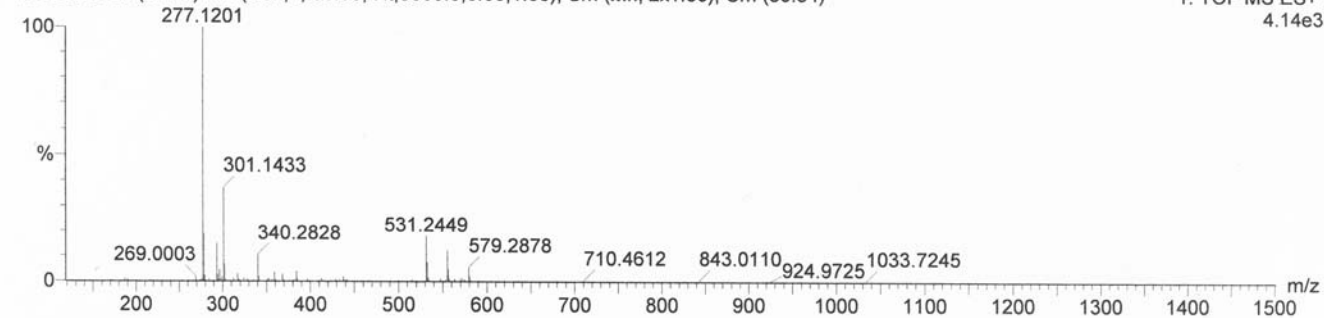

Minimum: -200.0  
Maximum: 5.0 5.0 200.0

| Mass     | Calc. Mass | mDa  | PPM  | DBE | i-FIT | Formula       |
|----------|------------|------|------|-----|-------|---------------|
| 277.1201 | 277.1204   | -0.3 | -1.1 | 8.5 | 0.2   | C17 H18 O2 Na |

## Elemental Composition Report

Page 1

### Single Mass Analysis (displaying only valid results)

Tolerance = 5.0 PPM / DBE: min = -200.0, max = 200.0

Selected filters: None

Monoisotopic Mass, Even Electron Ions

13 formula(e) evaluated with 1 results within limits (all results (up to 1000) for each mass)

Elements Used:

C: 0-100 H: 0-150 O: 2-2 Na: 1-1

xf-4-89C

12030912 8 (0.149) AM (Cen,2, 80.00, Ht,5000.0,0.00,1.00); Sm (Mn, 2x1.00); Cm (8:20)

13:32:11  
1: TOF MS ES+  
3.35e3

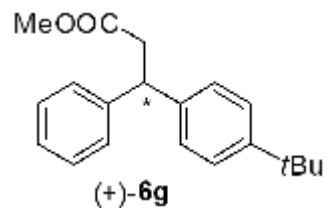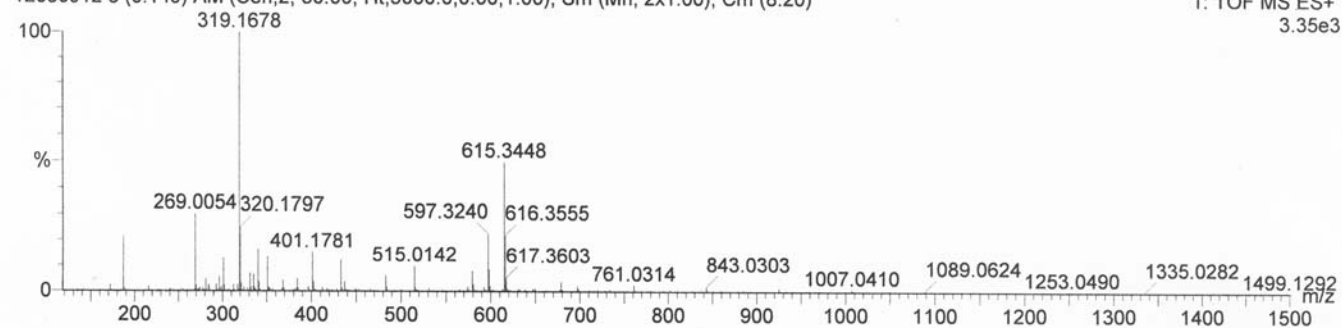

Minimum: -200.0  
Maximum: 5.0 5.0 200.0

| Mass     | Calc. Mass | mDa | PPM | DBE | i-FIT | Formula       |
|----------|------------|-----|-----|-----|-------|---------------|
| 319.1678 | 319.1674   | 0.4 | 1.3 | 8.5 | 5.2   | C20 H24 O2 Na |

## Elemental Composition Report

Page 1

### Single Mass Analysis (displaying only valid results)

Tolerance = 5.0 PPM / DBE: min = -200.0, max = 200.0

Selected filters: None

Monoisotopic Mass, Even Electron Ions

13 formula(e) evaluated with 1 results within limits (all results (up to 1000) for each mass)

Elements Used:

C: 0-100 H: 0-150 O: 2-2 Na: 1-1

xf-4-90A

12030913 10 (0.186) AM (Cen,2, 80.00, Ht,5000.0,0.00,1.00); Sm (Mn, 2x1.00); Cm (8:13)

13:36:00  
1: TOF MS ES+  
3.75e3

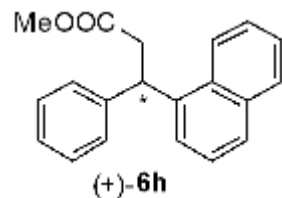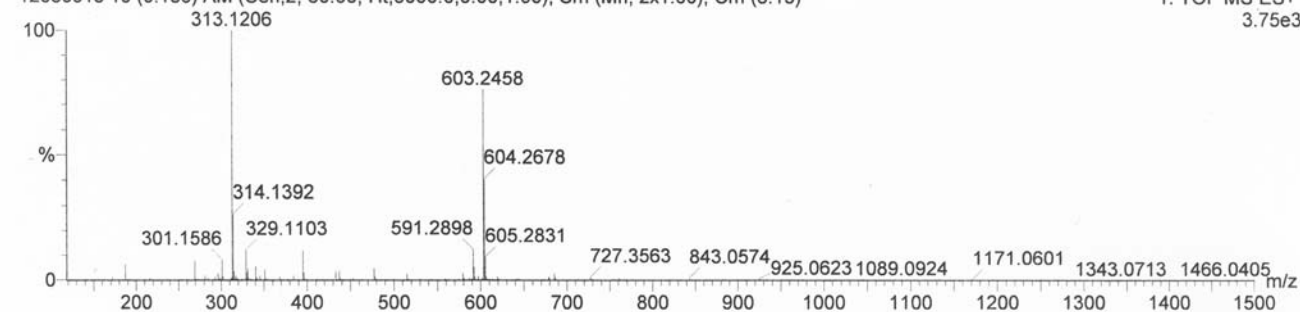

Minimum: -200.0  
Maximum: 5.0 5.0 200.0

| Mass     | Calc. Mass | mDa | PPM | DBE  | i-FIT | Formula       |
|----------|------------|-----|-----|------|-------|---------------|
| 313.1206 | 313.1204   | 0.2 | 0.6 | 11.5 | 19.3  | C20 H18 O2 Na |

## Elemental Composition Report

Page 1

### Single Mass Analysis (displaying only valid results)

Tolerance = 5.0 PPM / DBE: min = -200.0, max = 200.0

Selected filters: None

Monoisotopic Mass, Even Electron Ions

13 formula(e) evaluated with 1 results within limits (all results (up to 1000) for each mass)

Elements Used:

C: 0-100 H: 0-150 O: 2-2 Na: 1-1

xf-4-90B

12030914 10 (0.186) AM (Cen,2, 80.00, Ht,5000.0,0.00,1.00); Sm (Mn, 2x1.00); Cm (9:18)

13:39:24  
1: TOF MS ES+  
6.01e3

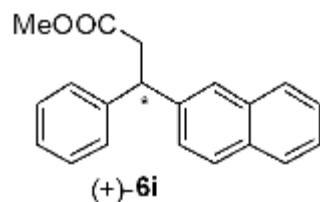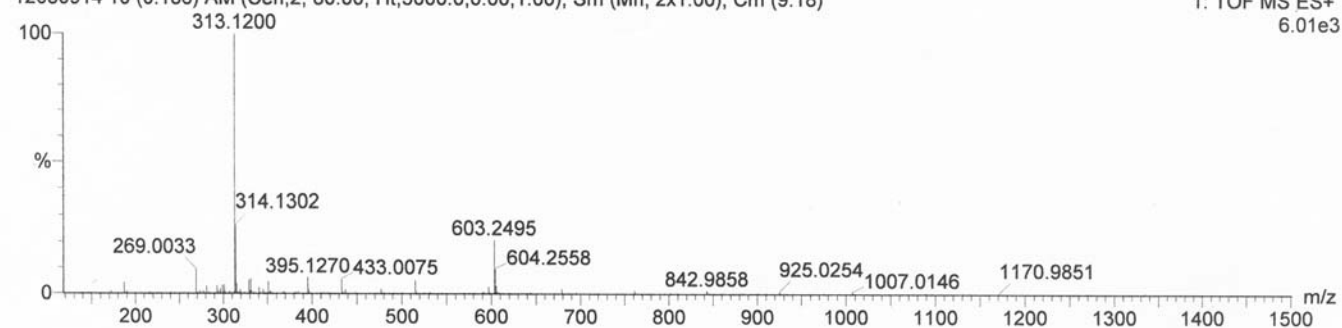

Minimum: -200.0  
Maximum: 5.0 5.0 200.0

| Mass     | Calc. Mass | mDa  | PPM  | DBE  | i-FIT | Formula       |
|----------|------------|------|------|------|-------|---------------|
| 313.1200 | 313.1204   | -0.4 | -1.3 | 11.5 | 21.4  | C20 H18 O2 Na |

## Elemental Composition Report

Page 1

### Single Mass Analysis (displaying only valid results)

Tolerance = 5.0 PPM / DBE: min = -200.0, max = 200.0

Selected filters: None

Monoisotopic Mass, Even Electron Ions

12 formula(e) evaluated with 1 results within limits (all results (up to 1000) for each mass)

Elements Used:

C: 0-100 H: 0-150 O: 4-4 Na: 1-1

xf-4-93

12030919 10 (0.187) AM (Cen,2, 80.00, Ht,5000.0,0.00,1.00); Sm (Mn, 2x1.00); Cm (10:20)

13:55:55  
1: TOF MS ES+  
1.66e4

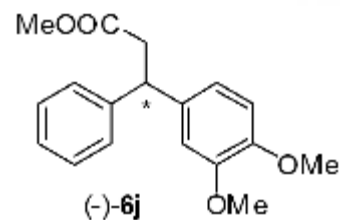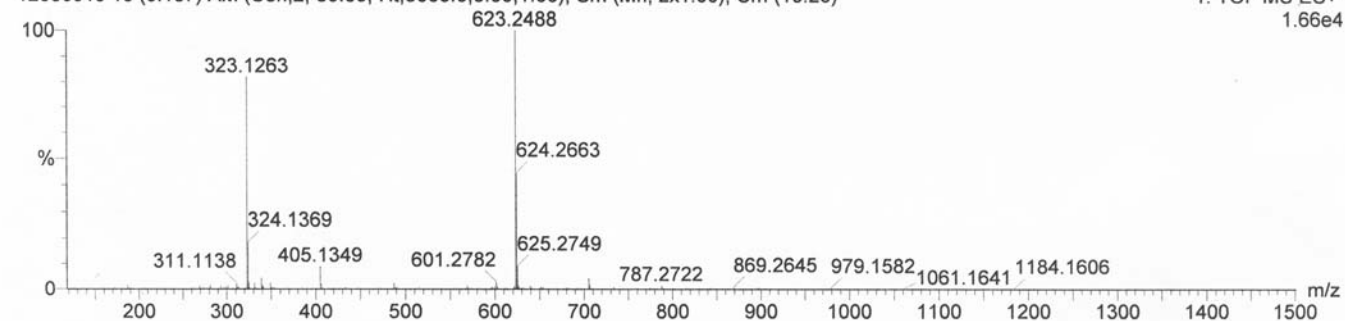

Minimum: -200.0  
Maximum: 5.0 5.0 200.0

| Mass     | Calc. Mass | mDa | PPM | DBE | i-FIT | Formula       |
|----------|------------|-----|-----|-----|-------|---------------|
| 323.1263 | 323.1259   | 0.4 | 1.2 | 8.5 | 17.8  | C18 H20 O4 Na |

## Elemental Composition Report

Page 1

### Single Mass Analysis (displaying only valid results)

Tolerance = 5.0 PPM / DBE: min = -200.0, max = 200.0

Selected filters: None

Monoisotopic Mass, Even Electron Ions

13 formula(e) evaluated with 1 results within limits (all results (up to 1000) for each mass)

Elements Used:

C: 0-100 H: 0-150 O: 2-2 F: 1-1 Na: 1-1

xf4-88A

12030908 21 (0.391) AM (Cen,2, 80.00, Ht,5000.0,0.00,1.00); Sm (Mn, 2x1.00); Cm (17:36)

13:12:43  
1: TOF MS ES+  
2.41e3

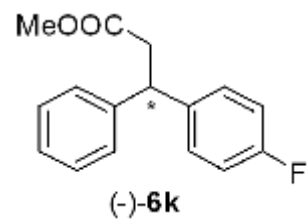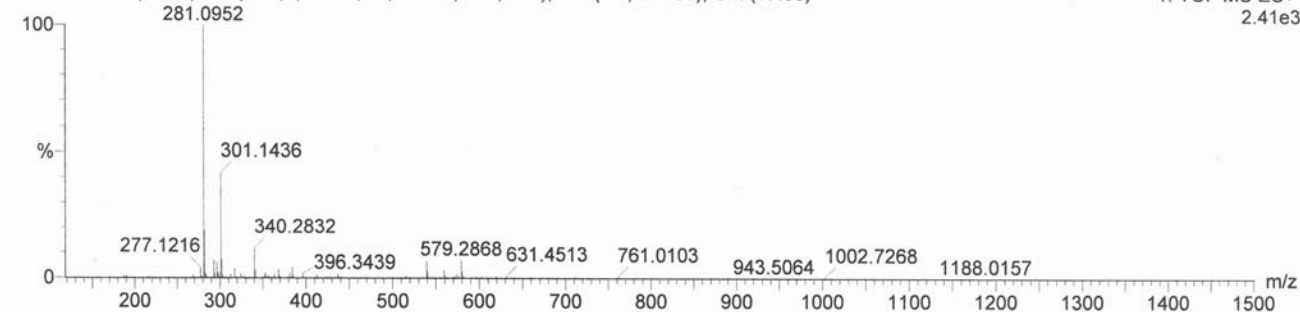

Minimum: -200.0  
Maximum: 5.0 5.0 200.0

| Mass     | Calc. Mass | mDa  | PPM  | DBE | i-FIT | Formula         |
|----------|------------|------|------|-----|-------|-----------------|
| 281.0952 | 281.0954   | -0.2 | -0.7 | 8.5 | 0.4   | C16 H15 O2 F Na |

## Elemental Composition Report

Page 1

### Single Mass Analysis (displaying only valid results)

Tolerance = 5.0 PPM / DBE: min = -200.0, max = 200.0

Selected filters: None

Monoisotopic Mass, Even Electron Ions

13 formula(e) evaluated with 1 results within limits (all results (up to 1000) for each mass)

Elements Used:

C: 0-100 H: 0-150 O: 2-2 Na: 1-1 Cl: 1-1

xf-4-89A

12030910 31 (0.577) AM (Cen,2, 80.00, Ht,5000.0,0.00,1.00); Sm (Mn, 2x1.00); Cm (24:40)

13:23:47  
1: TOF MS ES+  
1.51e4

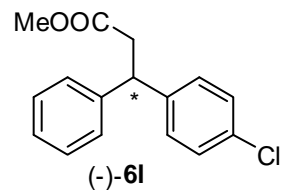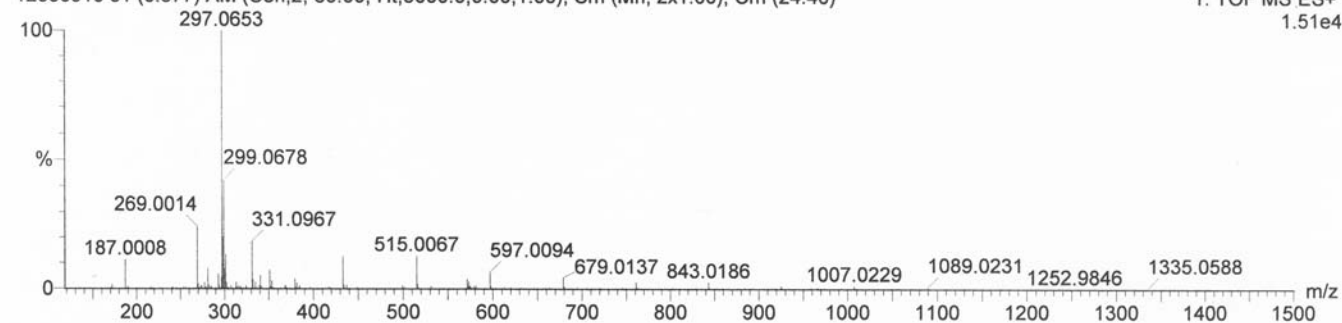

Minimum: -200.0  
Maximum: 5.0 5.0 200.0

| Mass     | Calc. Mass | mDa  | PPM  | DBE | i-FIT | Formula          |
|----------|------------|------|------|-----|-------|------------------|
| 297.0653 | 297.0658   | -0.5 | -1.7 | 8.5 | 108.2 | C16 H15 O2 Na Cl |

## Elemental Composition Report

Page 1

### Single Mass Analysis (displaying only valid results)

Tolerance = 5.0 PPM / DBE: min = -200.0, max = 200.0

Selected filters: None

Monoisotopic Mass, Even Electron Ions

13 formula(e) evaluated with 1 results within limits (all results (up to 1000) for each mass)

Elements Used:

C: 0-100 H: 0-150 O: 2-2 Na: 1-1 Br: 1-1

xf-4-89B

12030911 15 (0.279) AM (Cen,2, 80.00, Ht,5000.0,0.00,1.00); Sm (Mn, 2x1.00); Cm (14:36)

13:28:13  
1: TOF MS ES+  
4.52e3

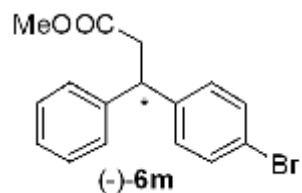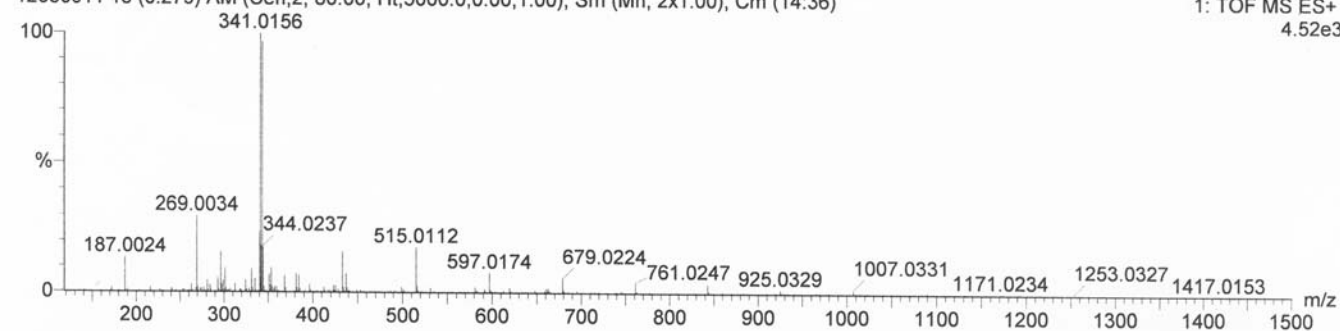

Minimum: -200.0  
Maximum: 5.0 5.0 200.0

| Mass     | Calc. Mass | mDa | PPM | DBE | i-FIT | Formula          |
|----------|------------|-----|-----|-----|-------|------------------|
| 341.0156 | 341.0153   | 0.3 | 0.9 | 8.5 | 1.8   | C16 H15 O2 Na Br |



## Elemental Composition Report

Page 1

### Single Mass Analysis (displaying only valid results)

Tolerance = 5.0 PPM / DBE: min = -200.0, max = 200.0

Selected filters: None

Monoisotopic Mass, Even Electron Ions

13 formula(e) evaluated with 1 results within limits (all results (up to 1000) for each mass)

Elements Used:

C: 0-100 H: 0-150 O: 2-2 F: 3-3 Na: 1-1

xf-4-88B

12030909 40 (0.742) AM (Cen,2, 80.00, Ht,5000.0,0.00,1.00); Sm (Mn, 2x1.00); Cm (35:74)

13:16:55  
1: TOF MS ES+  
4.30e3

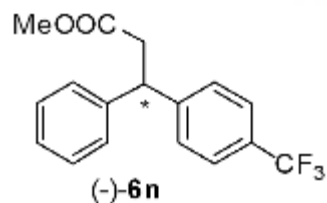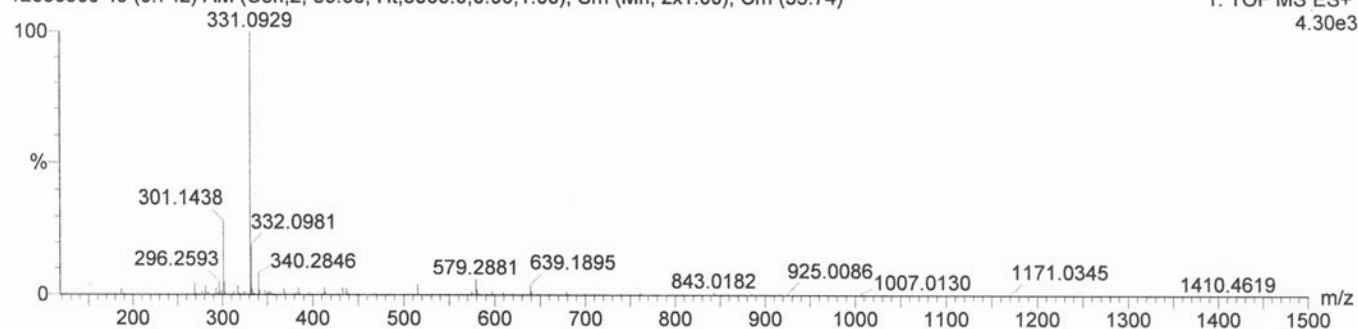

Minimum: -200.0  
Maximum: 5.0 5.0 200.0

| Mass     | Calc. Mass | mDa | PPM | DBE | i-FIT | Formula          |
|----------|------------|-----|-----|-----|-------|------------------|
| 331.0929 | 331.0922   | 0.7 | 2.1 | 8.5 | 0.6   | C17 H15 O2 F3 Na |

## Elemental Composition Report

Page 1

### Single Mass Analysis (displaying only valid results)

Tolerance = 5.0 PPM / DBE: min = -200.0, max = 200.0

Selected filters: None

Monoisotopic Mass, Even Electron Ions

12 formula(e) evaluated with 1 results within limits (all results (up to 1000) for each mass)

Elements Used:

C: 0-100 H: 0-150 O: 5-5 Na: 1-1

xf-4-91A

12030915 13 (0.242) AM (Cen,2, 80.00, Ht,5000.0,0.00,1.00); Sm (Mn, 2x1.00); Cm (5:15)

13:43:03  
1: TOF MS ES+  
1.75e4

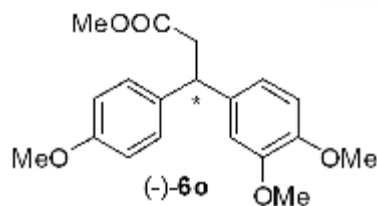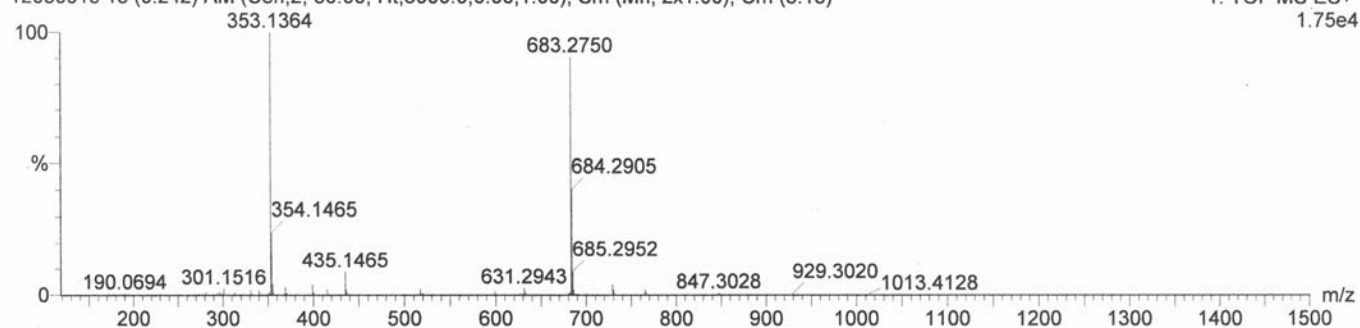

Minimum: -200.0  
Maximum: 5.0 5.0 200.0

| Mass     | Calc. Mass | mDa  | PPM  | DBE | i-FIT | Formula       |
|----------|------------|------|------|-----|-------|---------------|
| 353.1364 | 353.1365   | -0.1 | -0.3 | 8.5 | 35.7  | C19 H22 O5 Na |

## Elemental Composition Report

Page 1

### Single Mass Analysis (displaying only valid results)

Tolerance = 5.0 PPM / DBE: min = -200.0, max = 200.0

Selected filters: None

Monoisotopic Mass, Even Electron Ions

13 formula(e) evaluated with 1 results within limits (all results (up to 1000) for each mass)

Elements Used:

C: 0-100 H: 0-150 O: 3-3 F: 1-1 Na: 1-1

xf-4-92A

12030916 21 (0.391) AM (Cen,2, 80.00, Ht,5000.0,0.00,1.00); Sm (Mn, 2x1.00); Cm (20:60)

13:47:02  
 1: TOF MS ES+  
 1.60e4

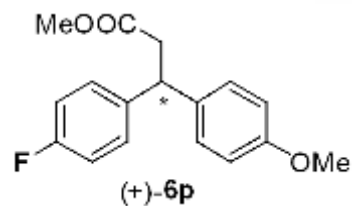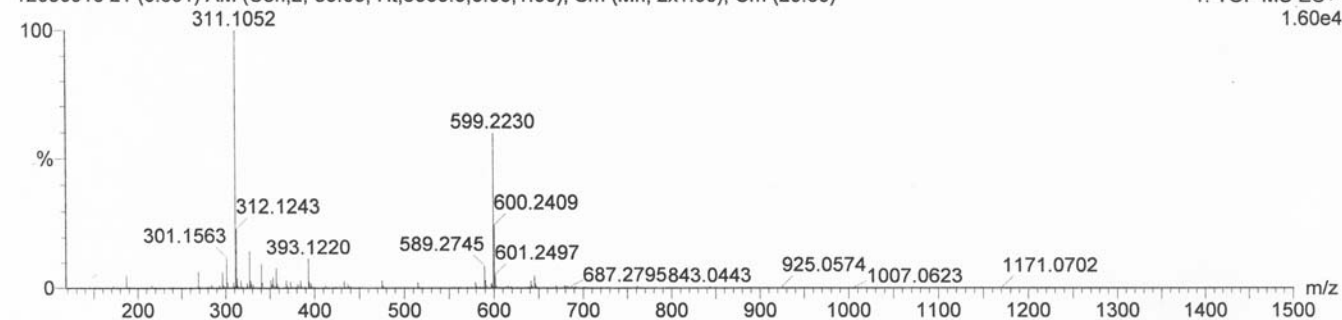

Minimum: -200.0  
 Maximum: 5.0 5.0 200.0

| Mass     | Calc. Mass | mDa  | PPM  | DBE | i-FIT | Formula         |
|----------|------------|------|------|-----|-------|-----------------|
| 311.1052 | 311.1059   | -0.7 | -2.3 | 8.5 | 113.7 | C17 H17 O3 F Na |

## Elemental Composition Report

Page 1

### Single Mass Analysis (displaying only valid results)

Tolerance = 5.0 PPM / DBE: min = -200.0, max = 200.0

Selected filters: None

Monoisotopic Mass, Even Electron Ions

13 formula(e) evaluated with 1 results within limits (all results (up to 1000) for each mass)

Elements Used:

C: 0-100 H: 0-150 O: 2-2 F: 4-4 Na: 1-1

xf-4-92B

12030918 45 (0.836) AM (Cen,2, 80.00, Ht,5000.0,0.00,1.00); Sm (Mn, 2x1.00); Cm (16:45)

13:51:40  
1: TOF MS ES+  
1.63e4

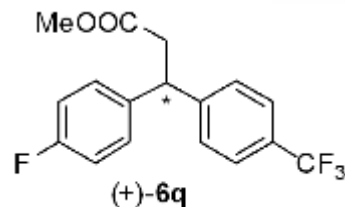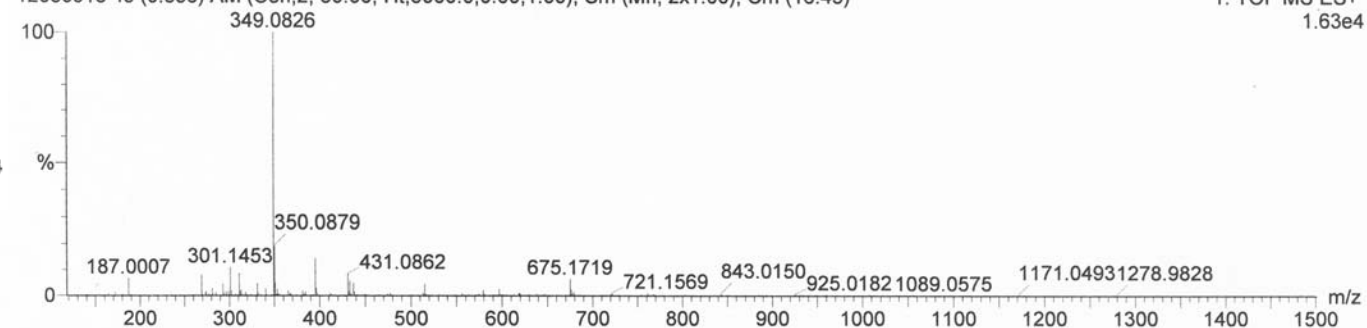

Minimum: -200.0  
Maximum: 5.0 5.0 200.0

| Mass     | Calc. Mass | mDa  | PPM  | DBE | i-FIT     | Formula          |
|----------|------------|------|------|-----|-----------|------------------|
| 349.0826 | 349.0828   | -0.2 | -0.6 | 8.5 | 2781368.8 | C17 H14 O2 F4 Na |

### 3. Copy of HPLC for the Racemic and Chiral compounds (6a-6q).

Data File C:\HPCHEM\3\DATA\XF\XF000378.D  
 Sample Name: xf-4-75(Raceme)

```

=====
Acq. Operator   :
Acq. Instrument : 1100                Location : Vial 1
Injection Date  : 12/27/2011 3:07:10 PM
Acq. Method     : C:\HPCHEM\3\METHODS\DEF_LC.M
Last changed    : 12/27/2011 10:38:28 AM
                  (modified after loading)
Analysis Method : C:\HPCHEM\3\METHODS\DEF_LC.M
Last changed    : 2/26/2012 8:57:52 PM
                  (modified after loading)
Sample Info     : Hexane/iPrOH=90/10, 1.0mL/min(44bar), 230nm, 25 C, OD-H
    
```

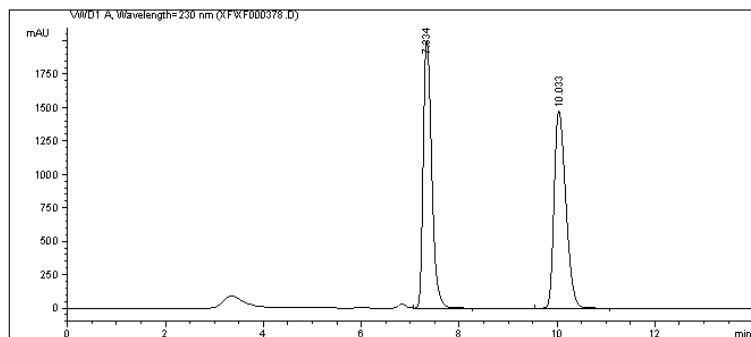

#### Area Percent Report

```

Sorted By      : Signal
Multiplier     : 1.0000
Dilution       : 1.0000
Use Multiplier & Dilution Factor with ISTDs
    
```

Signal 1: VWD1 A, Wavelength=230 nm

| Peak # | RetTime [min] | Type | Width [min] | Area mAU *s | Height [mAU] | Area %  |
|--------|---------------|------|-------------|-------------|--------------|---------|
| 1      | 7.334         | VB   | 0.1895      | 2.42369e4   | 1999.28943   | 49.7771 |
| 2      | 10.033        | BB   | 0.2592      | 2.44540e4   | 1473.28345   | 50.2229 |

Totals : 4.86910e4 3472.57288

\*\*\* End of Report \*\*\*

1100 2/26/2012 8:58:10 PM

Page 1 of 1

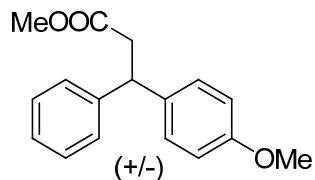

Data File C:\HPCHEM\3\DATA\XF\XF000394.D  
 Sample Name: xf-4-81C

```

=====
Acq. Operator   :
Acq. Instrument : 1100                Location : Vial 1
Injection Date   : 1/2/2012 2:27:44 PM
Acq. Method     : C:\HPCHEM\3\METHODS\DEF_LC.M
Last changed    : 1/2/2012 2:25:56 PM
                  (modified after loading)
Analysis Method : C:\HPCHEM\3\METHODS\DEF_LC.M
Last changed    : 2/26/2012 6:56:59 PM
                  (modified after loading)
Sample Info     : Hexane/iPrOH=90/10, 1.0mL/min(44bar), 230nm, 25 C, OD-H
    
```

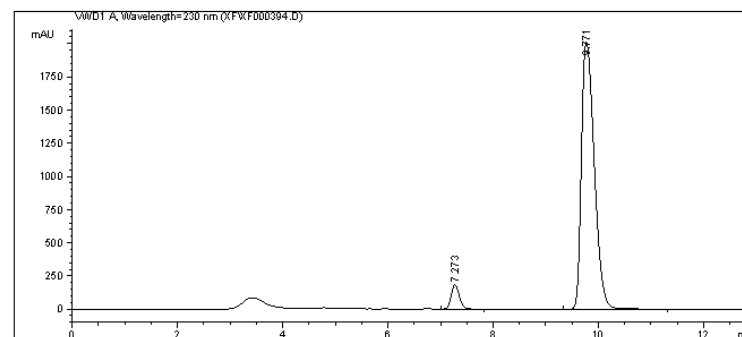

#### Area Percent Report

```

Sorted By      : Signal
Multiplier     : 1.0000
Dilution       : 1.0000
Use Multiplier & Dilution Factor with ISTDs
    
```

Signal 1: VWD1 A, Wavelength=230 nm

| Peak # | RetTime [min] | Type | Width [min] | Area mAU *s | Height [mAU] | Area %  |
|--------|---------------|------|-------------|-------------|--------------|---------|
| 1      | 7.273         | VB   | 0.1669      | 1972.24622  | 182.47591    | 5.4596  |
| 2      | 9.771         | BB   | 0.2650      | 3.41522e4   | 2012.41895   | 94.5404 |

Totals : 3.61244e4 2194.89485

\*\*\* End of Report \*\*\*

1100 2/26/2012 6:57:03 PM

Page 1 of 1

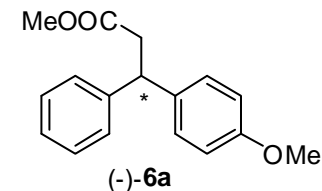

Data File C:\HPCHEM\3\DATA\XF\XF000406.D  
 Sample Name: xf-4-84(Raceme)

=====  
 Acq. Operator :  
 Acq. Instrument : 1100 Location : Vial 1  
 Injection Date : 1/5/2012 1:58:06 PM  
 Acq. Method : C:\HPCHEM\3\METHODS\DEF\_LC.M  
 Last changed : 1/5/2012 1:55:05 PM  
 (modified after loading)  
 Analysis Method : C:\HPCHEM\3\METHODS\DEF\_LC.M  
 Last changed : 2/26/2012 6:59:37 PM  
 (modified after loading)  
 Sample Info : Hexane/iPrOH=98/2, 1.0mL/min(37bar), 230nm, 25 C, AD-H.

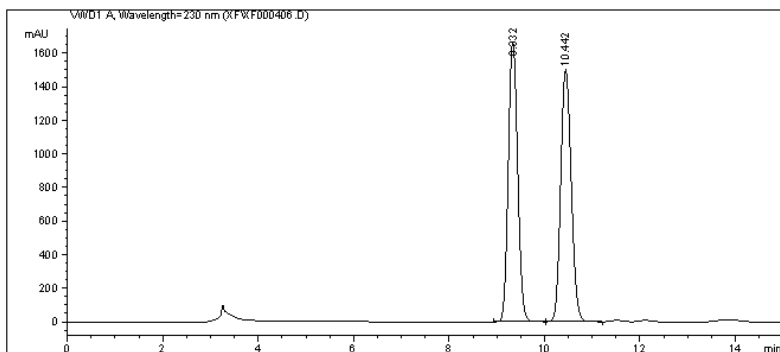

=====  
 Area Percent Report  
 =====

Sorted By : Signal  
 Multiplier : 1.0000  
 Dilution : 1.0000  
 Use Multiplier & Dilution Factor with ISTDs

Signal 1: WVD1 A, Wavelength=230 nm

| Peak # | RetTime [min] | Type | Width [min] | Area mAU *s | Height [mAU] | Area %  |
|--------|---------------|------|-------------|-------------|--------------|---------|
| 1      | 9.332         | BV   | 0.2151      | 2.28127e4   | 1666.01978   | 49.7194 |
| 2      | 10.442        | VV   | 0.2419      | 2.30702e4   | 1500.98438   | 50.2806 |

Totals : 4.58829e4 3167.00415

=====  
 \*\*\* End of Report \*\*\*

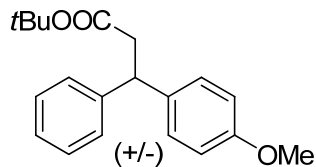

Data File C:\HPCHEM\3\DATA\XF\XF000405.D  
 Sample Name: xf-4-84

=====  
 Acq. Operator :  
 Acq. Instrument : 1100 Location : Vial 1  
 Injection Date : 1/5/2012 1:39:20 PM  
 Acq. Method : C:\HPCHEM\3\METHODS\DEF\_LC.M  
 Last changed : 1/5/2012 1:36:48 PM  
 (modified after loading)  
 Analysis Method : C:\HPCHEM\3\METHODS\DEF\_LC.M  
 Last changed : 2/26/2012 6:59:37 PM  
 (modified after loading)  
 Sample Info : Hexane/iPrOH=98/2, 1.0mL/min(37bar), 230nm, 25 C, AD-H.

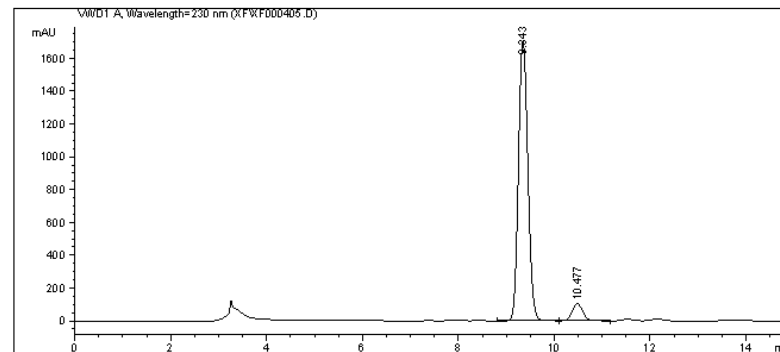

=====  
 Area Percent Report  
 =====

Sorted By : Signal  
 Multiplier : 1.0000  
 Dilution : 1.0000  
 Use Multiplier & Dilution Factor with ISTDs

Signal 1: WVD1 A, Wavelength=230 nm

| Peak # | RetTime [min] | Type | Width [min] | Area mAU *s | Height [mAU] | Area %  |
|--------|---------------|------|-------------|-------------|--------------|---------|
| 1      | 9.343         | BV   | 0.2148      | 2.33509e4   | 1708.23730   | 93.5301 |
| 2      | 10.477        | VB   | 0.2376      | 1615.27905  | 105.94375    | 6.4699  |

Totals : 2.49662e4 1814.18105

=====  
 \*\*\* End of Report \*\*\*

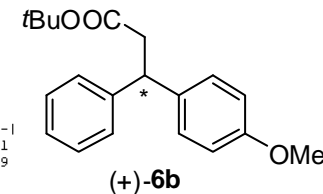

Data File C:\HPCHEM\3\DATA\XF\XF000407.D  
 Sample Name: xf-4-85(Raceme)

```

=====
Acq. Operator   :
Acq. Instrument : 1100                      Location : Vial 1
Injection Date  : 1/11/2012 9:35:02 AM
Acq. Method     : C:\HPCHEM\3\METHODS\XF.M
Last changed    : 1/11/2012 8:51:00 AM
                  (modified after loading)
Analysis Method : C:\HPCHEM\3\METHODS\DEF_LC.M
Last changed    : 2/26/2012 7:04:24 PM
                  (modified after loading)
Sample Info     : Hexane/iPrOH=98/2, 1.0mL/min(36bar), 230nm, 25 C, AD-H.
    
```

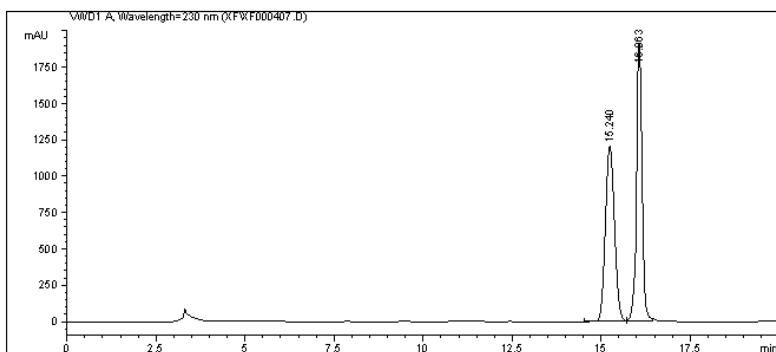

Area Percent Report

```

Sorted By      : Signal
Multiplier     : 1.0000
Dilution       : 1.0000
Use Multiplier & Dilution Factor with ISTDs
    
```

Signal 1: VWD1 A, Wavelength=230 nm

| Peak # | RetTime [min] | Type | Width [min] | Area [mAU*s] | Height [mAU] | Area %  |
|--------|---------------|------|-------------|--------------|--------------|---------|
| 1      | 15.240        | BV   | 0.2791      | 2.14903e4    | 1206.61987   | 50.5601 |
| 2      | 16.063        | VV   | 0.1704      | 2.10141e4    | 1913.07239   | 49.4399 |

Totals : 4.25044e4 3119.69226

\*\*\* End of Report \*\*\*

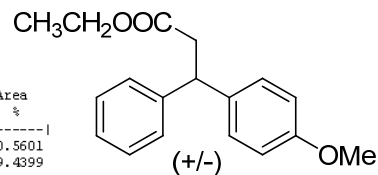

1100 2/26/2012 7:04:32 PM

Page 1 of 1

Data File C:\HPCHEM\3\DATA\XF\XF000408.D  
 Sample Name: xf-4-85

```

=====
Acq. Operator   :
Acq. Instrument : 1100                      Location : Vial 1
Injection Date  : 1/11/2012 10:09:20 AM
Acq. Method     : C:\HPCHEM\3\METHODS\DEF_LC.M
Last changed    : 1/11/2012 10:01:16 AM
                  (modified after loading)
Analysis Method : C:\HPCHEM\3\METHODS\DEF_LC.M
Last changed    : 2/26/2012 7:04:24 PM
                  (modified after loading)
Sample Info     : Hexane/iPrOH=98/2, 1.0mL/min(36bar), 230nm, 25 C, AD-H.
    
```

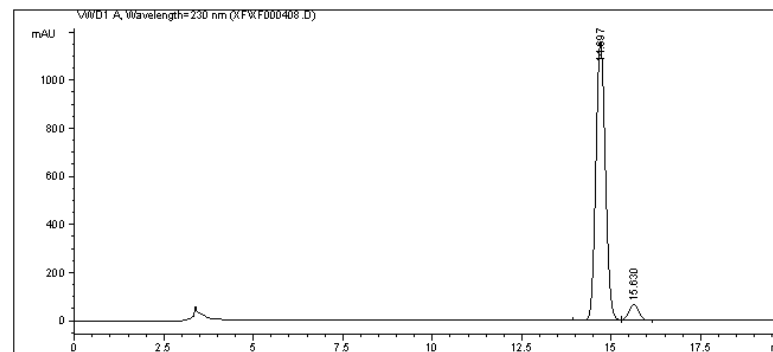

Area Percent Report

```

Sorted By      : Signal
Multiplier     : 1.0000
Dilution       : 1.0000
Use Multiplier & Dilution Factor with ISTDs
    
```

Signal 1: VWD1 A, Wavelength=230 nm

| Peak # | RetTime [min] | Type | Width [min] | Area [mAU*s] | Height [mAU] | Area %  |
|--------|---------------|------|-------------|--------------|--------------|---------|
| 1      | 14.697        | BV   | 0.2886      | 2.14264e4    | 1158.39258   | 94.5665 |
| 2      | 15.630        | VB   | 0.2972      | 1231.09851   | 64.85069     | 5.4335  |

Totals : 2.26575e4 1223.24326

\*\*\* End of Report \*\*\*

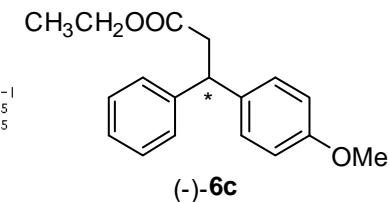

1100 2/26/2012 7:05:09 PM

Page 1 of 1

Data File C:\HPCHEM\3\DATA\XF\F000409.D  
 Sample Name: xf-4-86(Raceme)

=====  
 Acq. Operator :  
 Acq. Instrument : 1100 Location : Vial 1  
 Injection Date : 1/11/2012 10:36:54 AM  
 Acq. Method : C:\HPCHEM\3\METHODS\DEF\_LC.M  
 Last changed : 1/11/2012 10:32:21 AM  
 (modified after loading)  
 Analysis Method : C:\HPCHEM\3\METHODS\DEF\_LC.M  
 Last changed : 2/26/2012 7:07:41 PM  
 (modified after loading)  
 Sample Info : Hexane/iPrOH=98/2, 1.0mL/min(36bar), 230nm, 25 C, AD-H.

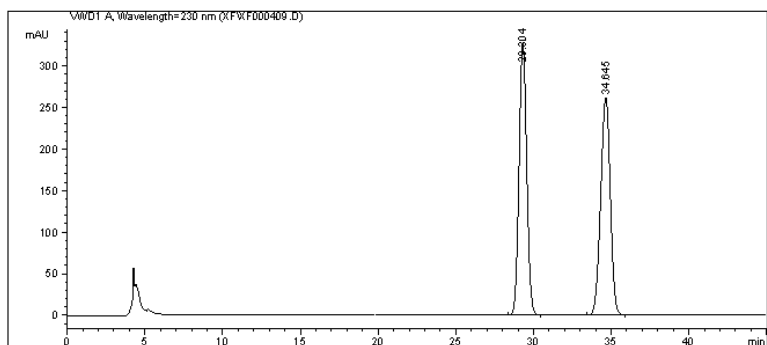

=====  
 Area Percent Report  
 =====

Sorted By : Signal  
 Multiplier : 1.0000  
 Dilution : 1.0000  
 Use Multiplier & Dilution Factor with ISTDs

Signal 1: VWD1 A, Wavelength=230 nm

| Peak # | RetTime [min] | Type | Width [min] | Area mAU  | Area %  | Height [mAU] | Area %  |
|--------|---------------|------|-------------|-----------|---------|--------------|---------|
| 1      | 29.304        | BB   | 0.5357      | 1.12878e4 | 50.1033 | 327.76944    | 50.1033 |
| 2      | 34.645        | BB   | 0.6720      | 1.12412e4 | 49.8967 | 261.42886    | 49.8967 |

Totals : 2.25290e4 589.19830

=====  
 \*\*\* End of Report \*\*\*

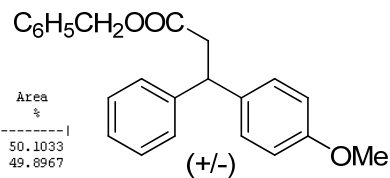

1100 2/26/2012 7:07:46 PM

Page 1 of 1

Data File C:\HPCHEM\3\DATA\XF\F000410.D  
 Sample Name: xf-4-86

=====  
 Acq. Operator :  
 Acq. Instrument : 1100 Location : Vial 1  
 Injection Date : 1/11/2012 11:26:13 AM  
 Acq. Method : C:\HPCHEM\3\METHODS\DEF\_LC.M  
 Last changed : 1/11/2012 11:24:28 AM  
 (modified after loading)  
 Analysis Method : C:\HPCHEM\3\METHODS\DEF\_LC.M  
 Last changed : 2/26/2012 7:07:41 PM  
 (modified after loading)  
 Sample Info : Hexane/iPrOH=98/2, 1.0mL/min(36bar), 230nm, 25 C, AD-H.

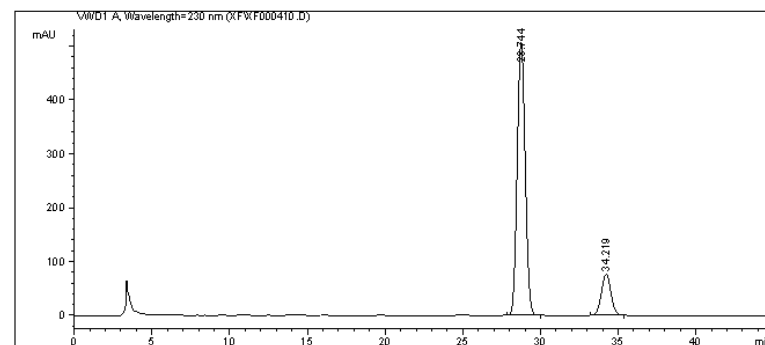

=====  
 Area Percent Report  
 =====

Sorted By : Signal  
 Multiplier : 1.0000  
 Dilution : 1.0000  
 Use Multiplier & Dilution Factor with ISTDs

Signal 1: VWD1 A, Wavelength=230 nm

| Peak # | RetTime [min] | Type | Width [min] | Area mAU   | Area %  | Height [mAU] | Area %  |
|--------|---------------|------|-------------|------------|---------|--------------|---------|
| 1      | 28.744        | BB   | 0.5611      | 1.81659e4  | 84.9078 | 506.57684    | 84.9078 |
| 2      | 34.219        | BB   | 0.6649      | 3228.96655 | 15.0922 | 76.17113     | 15.0922 |

Totals : 2.13949e4 582.74798

=====  
 \*\*\* End of Report \*\*\*

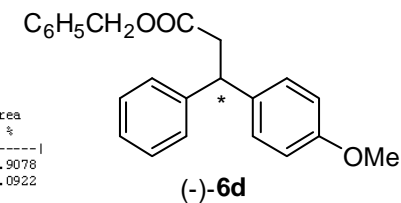

1100 2/26/2012 7:08:05 PM

Page 1 of 1



Data File C:\HPCHEM\3\DATA\XF\XF000412.D  
 Sample Name: xf-4-87A(Raceme)

=====  
 Acq. Operator :  
 Acq. Instrument : 1100 Location : Vial 1  
 Injection Date : 2/4/2012 1:46:53 PM  
 Acq. Method : C:\HPCHEM\3\METHODS\DEF\_LC.M  
 Last changed : 2/4/2012 1:36:59 PM  
 (modified after loading)  
 Analysis Method : C:\HPCHEM\3\METHODS\DEF\_LC.M  
 Last changed : 2/26/2012 7:12:13 PM  
 (modified after loading)  
 Sample Info : Hexane/iPrOH=80/20, 1.0mL/min(49bar), 230nm, 25 C, OD-H

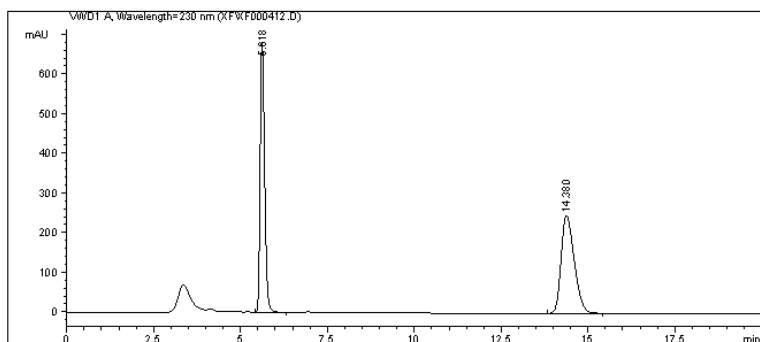

=====  
 Area Percent Report  
 =====

Sorted By : Signal  
 Multiplier : 1.0000  
 Dilution : 1.0000  
 Use Multiplier & Dilution Factor with ISTDs

Signal 1: VWD1 A, Wavelength=230 nm

| Peak # | RetTime [min] | Type | Width [min] | Area mAU   | Area %  | Height [mAU] | Area %  |
|--------|---------------|------|-------------|------------|---------|--------------|---------|
| 1      | 5.618         | VB   | 0.1401      | 6144.54639 | 48.7645 | 681.69232    | 48.7645 |
| 2      | 14.380        | BB   | 0.4061      | 6455.90918 | 51.2355 | 246.45427    | 51.2355 |

Totals : 1.26005e4 928.14659

=====  
 \*\*\* End of Report \*\*\*

1100 2/26/2012 7:12:18 PM

Page 1 of 1

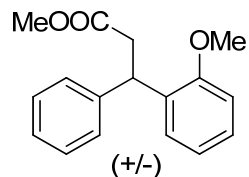

Data File C:\HPCHEM\3\DATA\XF\XF000413.D  
 Sample Name: xf-4-87A

=====  
 Acq. Operator :  
 Acq. Instrument : 1100 Location : Vial 1  
 Injection Date : 2/4/2012 2:09:23 PM  
 Acq. Method : C:\HPCHEM\3\METHODS\DEF\_LC.M  
 Last changed : 2/4/2012 2:08:12 PM  
 (modified after loading)  
 Analysis Method : C:\HPCHEM\3\METHODS\DEF\_LC.M  
 Last changed : 2/26/2012 7:12:13 PM  
 (modified after loading)  
 Sample Info : Hexane/iPrOH=80/20, 1.0mL/min(49bar), 230nm, 25 C, OD-H

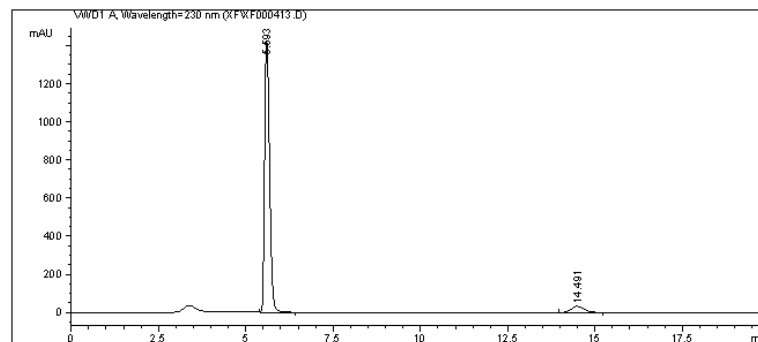

=====  
 Area Percent Report  
 =====

Sorted By : Signal  
 Multiplier : 1.0000  
 Dilution : 1.0000  
 Use Multiplier & Dilution Factor with ISTDs

Signal 1: VWD1 A, Wavelength=230 nm

| Peak # | RetTime [min] | Type | Width [min] | Area mAU  | Area %  | Height [mAU] | Area %  |
|--------|---------------|------|-------------|-----------|---------|--------------|---------|
| 1      | 5.593         | VV   | 0.1565      | 1.41312e4 | 94.6022 | 1424.47620   | 94.6022 |
| 2      | 14.491        | BB   | 0.3925      | 806.29736 | 5.3978  | 31.89301     | 5.3978  |

Totals : 1.49375e4 1456.36920

=====  
 \*\*\* End of Report \*\*\*

1100 2/26/2012 7:12:36 PM

Page 1 of 1

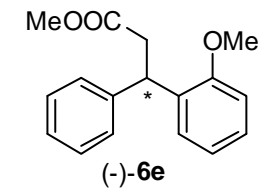

Data File C:\HPCHEM\3\DATA\XF\F000414.D  
 Sample Name: xf-4-87B (Raceme)

```

=====
Acq. Operator   :
Acq. Instrument : 1100                      Location : Vial 1
Injection Date  : 2/4/2012 2:37:51 PM
Acq. Method     : C:\HPCHEM\3\METHODS\DEF_LC.M
Last changed    : 2/4/2012 2:36:36 PM
                  (modified after loading)
Analysis Method : C:\HPCHEM\3\METHODS\DEF_LC.M
Last changed    : 2/26/2012 7:14:24 PM
                  (modified after loading)
Sample Info     : Hexane/iPrOH=80/20, 1.0mL/min(49bar), 230nm, 25 C, 0D-H
    
```

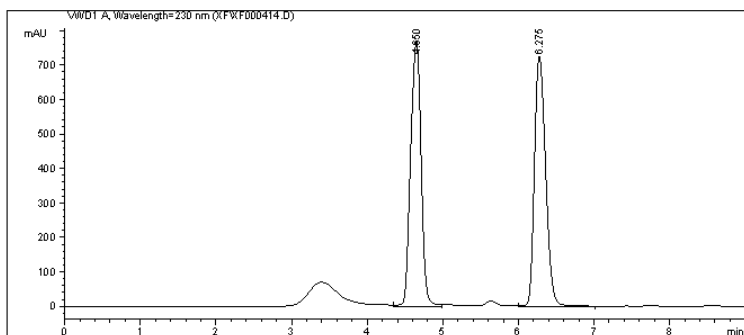

Area Percent Report

```

Sorted By      : Signal
Multiplier     : 1.0000
Dilution       : 1.0000
Use Multiplier & Dilution Factor with ISTDs
    
```

Signal 1: VWD1 A, Wavelength=230 nm

| Peak # | RetTime [min] | Type | Width [min] | Area mAU   | *s        | Height [mAU] | Area %  |
|--------|---------------|------|-------------|------------|-----------|--------------|---------|
| 1      | 4.650         | VV   | 0.1590      | 7421.77637 | 770.02319 | 49.4732      | 49.4732 |
| 2      | 6.275         | VB   | 0.1618      | 7425.57764 | 724.60004 | 49.4985      | 49.4985 |
| 3      | 33.139        | BB   | 0.6729      | 154.25591  | 3.44149   | 1.0283       | 1.0283  |

Totals : 1.50016e4 1498.06472

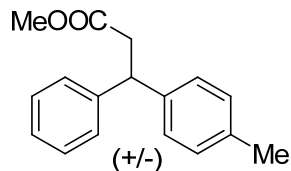

1100 2/26/2012 7:14:30 PM

Page 1 of 1

Data File C:\HPCHEM\3\DATA\XF\F000415.D  
 Sample Name: xf-4-87B

```

=====
Acq. Operator   :
Acq. Instrument : 1100                      Location : Vial 1
Injection Date  : 2/4/2012 3:15:06 PM
Acq. Method     : C:\HPCHEM\3\METHODS\DEF_LC.M
Last changed    : 2/4/2012 3:13:36 PM
                  (modified after loading)
Analysis Method : C:\HPCHEM\3\METHODS\DEF_LC.M
Last changed    : 2/26/2012 7:14:24 PM
                  (modified after loading)
Sample Info     : Hexane/iPrOH=80/20, 1.0mL/min(49bar), 230nm, 25 C, 0D-H
    
```

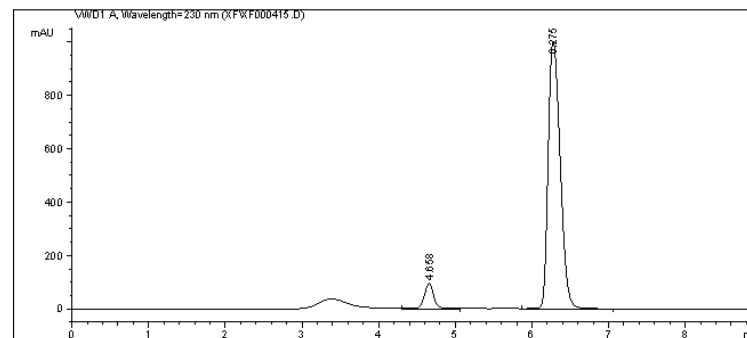

Area Percent Report

```

Sorted By      : Signal
Multiplier     : 1.0000
Dilution       : 1.0000
Use Multiplier & Dilution Factor with ISTDs
    
```

Signal 1: VWD1 A, Wavelength=230 nm

| Peak # | RetTime [min] | Type | Width [min] | Area mAU  | *s         | Height [mAU] | Area %  |
|--------|---------------|------|-------------|-----------|------------|--------------|---------|
| 1      | 4.658         | VB   | 0.1319      | 848.09338 | 96.23637   | 7.2102       | 7.2102  |
| 2      | 6.275         | VB   | 0.1732      | 1.09143e4 | 1005.78247 | 92.7898      | 92.7898 |

Totals : 1.17624e4 1102.01884

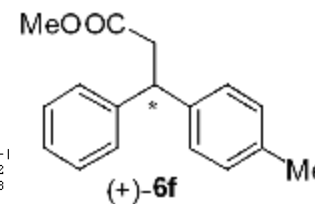

\*\*\* End of Report \*\*\*

1100 2/26/2012 7:14:58 PM

Page 1 of 1

Data File C:\HPCHEM\3\DATA\XF\XF000428.D  
 Sample Name: xf-4-89C(Raceme)

-----  
 Acq. Operator :  
 Acq. Instrument : 1100 Location : Vial 1  
 Injection Date : 2/6/2012 3:59:24 PM  
 Acq. Method : C:\HPCHEM\3\METHODS\DEF\_LC.M  
 Last changed : 2/6/2012 3:57:21 PM  
 (modified after loading)  
 Analysis Method : C:\HPCHEM\3\METHODS\DEF\_LC.M  
 Last changed : 2/26/2012 7:34:09 PM  
 (modified after loading)  
 Sample Info : Hexane/iPrOH=90/10, 1.0mL/min(44bar), 230nm, 25 C, OD-H  
 -----

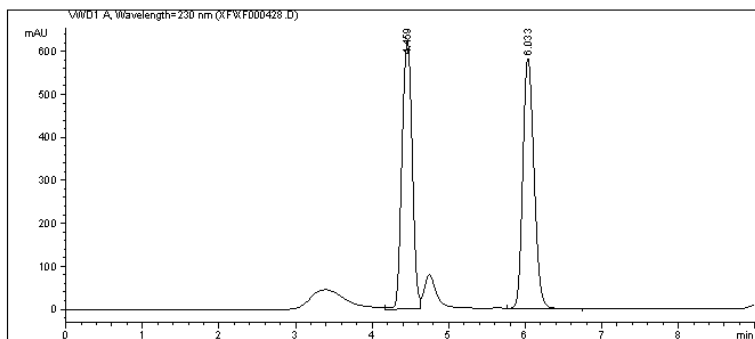

-----  
 Area Percent Report  
 -----

Sorted By : Signal  
 Multiplier : 1.0000  
 Dilution : 1.0000  
 Use Multiplier & Dilution Factor with ISTDs

Signal 1: VWD1 A, Wavelength=230 nm

| Peak # | RetTime [min] | Type | Width [min] | Area mAU   | *s | Height [mAU] | Area %  |
|--------|---------------|------|-------------|------------|----|--------------|---------|
| 1      | 4.459         | VV   | 0.1510      | 5825.72656 |    | 624.76257    | 49.4119 |
| 2      | 6.033         | VB   | 0.1600      | 5964.40918 |    | 583.68243    | 50.5881 |

Totals : 1.17901e4 1208.44501

\*\*\* End of Report \*\*\*

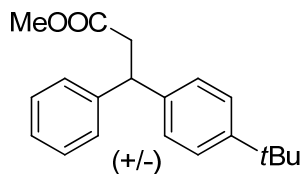

Data File C:\HPCHEM\3\DATA\XF\XF000429.D  
 Sample Name: xf-4-89C

-----  
 Acq. Operator :  
 Acq. Instrument : 1100 Location : Vial 1  
 Injection Date : 2/6/2012 4:38:39 PM  
 Acq. Method : C:\HPCHEM\3\METHODS\DEF\_LC.M  
 Last changed : 2/6/2012 4:36:50 PM  
 (modified after loading)  
 Analysis Method : C:\HPCHEM\3\METHODS\DEF\_LC.M  
 Last changed : 2/26/2012 7:34:09 PM  
 (modified after loading)  
 Sample Info : Hexane/iPrOH=90/10, 1.0mL/min(44bar), 230nm, 25 C, OD-H  
 -----

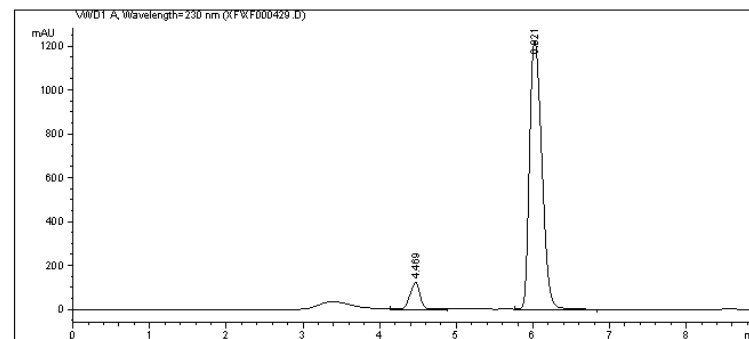

-----  
 Area Percent Report  
 -----

Sorted By : Signal  
 Multiplier : 1.0000  
 Dilution : 1.0000  
 Use Multiplier & Dilution Factor with ISTDs

Signal 1: VWD1 A, Wavelength=230 nm

| Peak # | RetTime [min] | Type | Width [min] | Area mAU   | *s | Height [mAU] | Area %  |
|--------|---------------|------|-------------|------------|----|--------------|---------|
| 1      | 4.469         | VB   | 0.1518      | 1155.50427 |    | 122.99761    | 7.8047  |
| 2      | 6.021         | VB   | 0.1796      | 1.36498e4  |    | 1224.24268   | 92.1953 |

Totals : 1.48053e4 1347.24029

\*\*\* End of Report \*\*\*

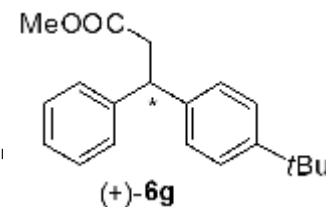

Data File C:\HPCHEM\3\DATA\XF\F000430.D  
 Sample Name: xf-4-90A(Raceme)

=====  
 Acq. Operator :  
 Acq. Instrument : 1100 Location : Vial 1  
 Injection Date : 2/6/2012 4:55:09 PM  
 Acq. Method : C:\HPCHEM\3\METHODS\DEF\_LC.M  
 Last changed : 2/6/2012 4:52:51 PM  
 (modified after loading)  
 Analysis Method : C:\HPCHEM\3\METHODS\DEF\_LC.M  
 Last changed : 2/26/2012 7:36:52 PM  
 (modified after loading)  
 Sample Info : Hexane/iPrOH=90/10, 1.0mL/min(44bar), 230nm, 25 C, OD-H

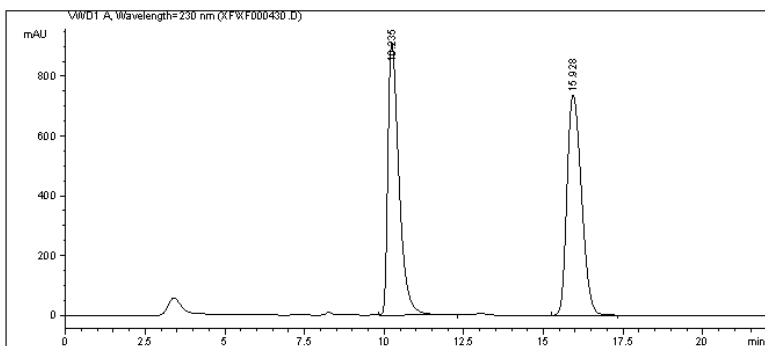

=====  
 Area Percent Report  
 =====

Sorted By : Signal  
 Multiplier : 1.0000  
 Dilution : 1.0000  
 Use Multiplier & Dilution Factor with ISTDs

Signal 1: VMD1 A, Wavelength=230 nm

| Peak # | RetTime [min] | Type | Width [min] | Area mAU *s | Height [mAU] | Area %  |
|--------|---------------|------|-------------|-------------|--------------|---------|
| 1      | 10.235        | VB   | 0.3697      | 2.21253e4   | 914.34167    | 48.7677 |
| 2      | 15.928        | BB   | 0.4998      | 2.32434e4   | 738.34515    | 51.2323 |

Totals : 4.53686e4 1652.68683

=====  
 \*\*\* End of Report \*\*\*

1100 2/26/2012 7:36:58 PM

Page 1 of 1

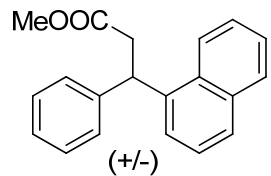

Data File C:\HPCHEM\3\DATA\XF\F000431.D  
 Sample Name: xf-4-90A

=====  
 Acq. Operator :  
 Acq. Instrument : 1100 Location : Vial 1  
 Injection Date : 2/6/2012 5:36:40 PM  
 Acq. Method : C:\HPCHEM\3\METHODS\DEF\_LC.M  
 Last changed : 2/6/2012 5:34:59 PM  
 (modified after loading)  
 Analysis Method : C:\HPCHEM\3\METHODS\DEF\_LC.M  
 Last changed : 2/26/2012 7:36:52 PM  
 (modified after loading)  
 Sample Info : Hexane/iPrOH=90/10, 1.0mL/min(44bar), 230nm, 25 C, OD-H

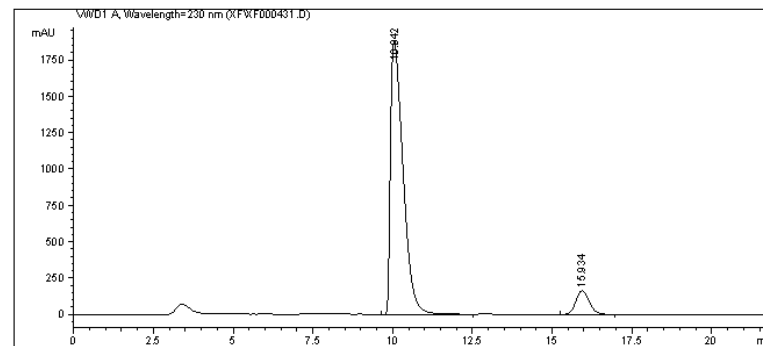

=====  
 Area Percent Report  
 =====

Sorted By : Signal  
 Multiplier : 1.0000  
 Dilution : 1.0000  
 Use Multiplier & Dilution Factor with ISTDs

Signal 1: VMD1 A, Wavelength=230 nm

| Peak # | RetTime [min] | Type | Width [min] | Area mAU *s | Height [mAU] | Area %  |
|--------|---------------|------|-------------|-------------|--------------|---------|
| 1      | 10.042        | BB   | 0.4289      | 5.15692e4   | 1882.08813   | 91.6487 |
| 2      | 15.934        | BB   | 0.4494      | 4699.16260  | 163.22632    | 8.3513  |

Totals : 5.62683e4 2045.31445

=====  
 \*\*\* End of Report \*\*\*

1100 2/26/2012 7:37:20 PM

Page 1 of 1

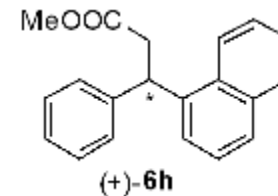

Data File C:\HPCHEM\3\DATA\XF\XF000432.D  
 Sample Name: xf-4-90B (Raceme)

=====  
 Acq. Operator :  
 Acq. Instrument : 1100 Location : Vial 1  
 Injection Date : 2/6/2012 6:10:11 PM  
 Acq. Method : C:\HPCHEM\3\METHODS\DEF\_LC.M  
 Last changed : 2/6/2012 6:08:11 PM  
 (modified after loading)  
 Analysis Method : C:\HPCHEM\3\METHODS\DEF\_LC.M  
 Last changed : 2/26/2012 7:40:01 PM  
 (modified after loading)  
 Sample Info : Hexane/iPrOH=90/10, 1.0mL/min(44bar), 230nm, 25 C, OD-H

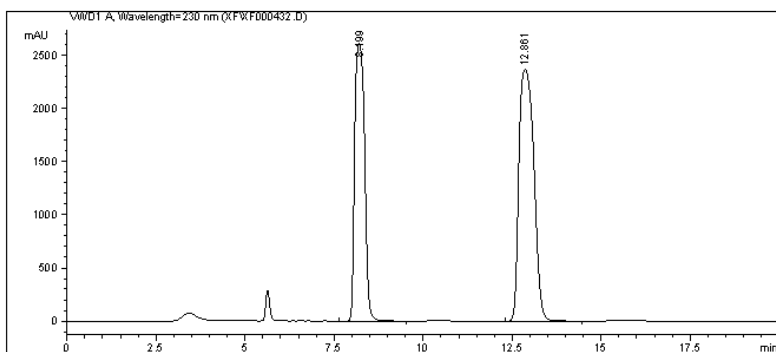

=====  
 Area Percent Report  
 =====

Sorted By : Signal  
 Multiplier : 1.0000  
 Dilution : 1.0000  
 Use Multiplier & Dilution Factor with ISTDs

Signal 1: VWD1 A, Wavelength=230 nm

| Peak # | RetTime [min] | Type | Width [min] | Area mAU  | *s | Height [mAU] | Area %  |
|--------|---------------|------|-------------|-----------|----|--------------|---------|
| 1      | 8.199         | BB   | 0.3199      | 5.04238e4 |    | 2611.90308   | 42.2325 |
| 2      | 12.861        | BB   | 0.4811      | 6.89721e4 |    | 2367.92456   | 57.7675 |

Totals : 1.19396e5 4979.82764

=====  
 \*\*\* End of Report \*\*\*

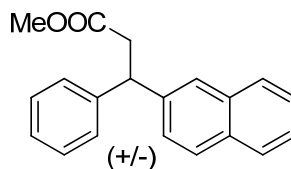

Data File C:\HPCHEM\3\DATA\XF\XF000433.D  
 Sample Name: xf-4-90B

=====  
 Acq. Operator :  
 Acq. Instrument : 1100 Location : Vial 1  
 Injection Date : 2/6/2012 6:53:21 PM  
 Acq. Method : C:\HPCHEM\3\METHODS\DEF\_LC.M  
 Last changed : 2/6/2012 6:50:32 PM  
 (modified after loading)  
 Analysis Method : C:\HPCHEM\3\METHODS\DEF\_LC.M  
 Last changed : 2/26/2012 7:40:01 PM  
 (modified after loading)  
 Sample Info : Hexane/iPrOH=90/10, 1.0mL/min(44bar), 230nm, 25 C, OD-H

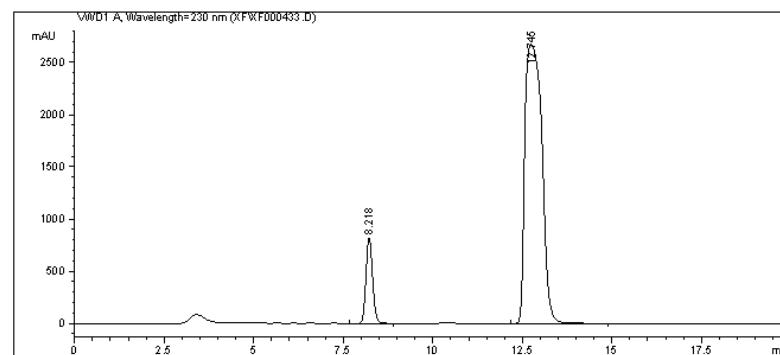

=====  
 Area Percent Report  
 =====

Sorted By : Signal  
 Multiplier : 1.0000  
 Dilution : 1.0000  
 Use Multiplier & Dilution Factor with ISTDs

Signal 1: VWD1 A, Wavelength=230 nm

| Peak # | RetTime [min] | Type | Width [min] | Area mAU  | *s | Height [mAU] | Area %  |
|--------|---------------|------|-------------|-----------|----|--------------|---------|
| 1      | 8.218         | BB   | 0.2013      | 1.05603e4 |    | 819.53387    | 10.7294 |
| 2      | 12.745        | BB   | 0.5476      | 8.78632e4 |    | 2676.17603   | 89.2706 |

Totals : 9.84235e4 3495.70990

=====  
 \*\*\* End of Report \*\*\*

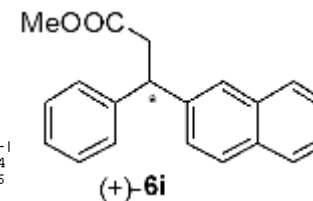

Data File C:\CHEM32\1\DATA\WJ\XF40 2012-02-26 16-28-24\WJ000258.D  
 Sample Name: XF-4-93(R)

```

=====
Acq. Operator   : WJ                      Seq. Line : 1
Acq. Instrument : Instrument 1             Location  : Vial 33
Injection Date  : 2/26/2012 4:29:41 PM    Inj       : 1
                                           Inj Volume: 5 µl
Acq. Method    : C:\Chem32\1\DATA\WJ\XF40 2012-02-26 16-28-24\XF40.M
Last changed   : 2/26/2012 4:28:21 PM by WJ
Analysis Method: C:\CHEM32\1\METHODS\XF40.M
Last changed   : 2/26/2012 6:46:12 PM by WJ
                                           (modified after loading)
Sample Info    : Hexane/i-PrOH=95/5, 1.0ml/min(47bar), 25C 230nm OD-H
    
```

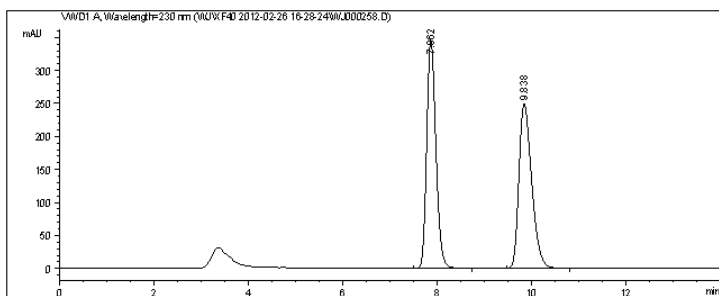

Area Percent Report

```

Sorted By      : Signal
Multiplier     : 1.0000
Dilution       : 1.0000
Use Multiplier & Dilution Factor with ISTDs
    
```

Signal 1: WVD1 A, Wavelength=230 nm

| Peak # | RetTime [min] | Type | Width [min] | Area mAU*s | Height [mAU] | Area %  |
|--------|---------------|------|-------------|------------|--------------|---------|
| 1      | 7.862         | BB   | 0.2089      | 4690.66699 | 346.39114    | 50.0569 |
| 2      | 9.838         | BB   | 0.2890      | 4679.99512 | 249.15150    | 49.9431 |

Totals : 9370.66211 595.54265

\*\*\* End of Report \*\*\*

Instrument 1 2/26/2012 6:46:15 PM WJ

Page 1 of 1

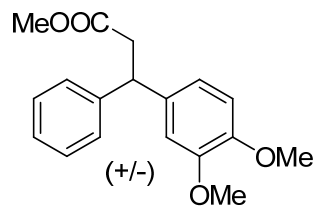

Data File C:\CHEM32\1\DATA\WJ\XF40 2012-02-26 16-48-33\WJ000258.D  
 Sample Name: XF-4-93

```

=====
Acq. Operator   : WJ                      Seq. Line : 1
Acq. Instrument : Instrument 1             Location  : Vial 34
Injection Date  : 2/26/2012 4:49:51 PM    Inj       : 1
                                           Inj Volume: 5 µl
Acq. Method    : C:\Chem32\1\DATA\WJ\XF40 2012-02-26 16-48-33\XF40.M
Last changed   : 2/26/2012 5:02:41 PM by WJ
                                           (modified after loading)
Analysis Method: C:\CHEM32\1\METHODS\XF40.M
Last changed   : 2/26/2012 6:47:28 PM by WJ
                                           (modified after loading)
Sample Info    : Hexane/i-PrOH=95/5, 1.0ml/min(47bar), 25C 230nm OD-H
    
```

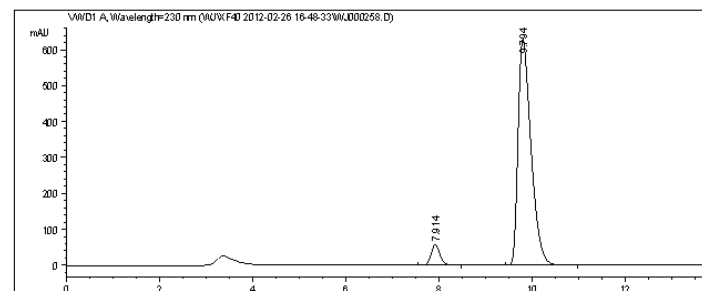

Area Percent Report

```

Sorted By      : Signal
Multiplier     : 1.0000
Dilution       : 1.0000
Use Multiplier & Dilution Factor with ISTDs
    
```

Signal 1: WVD1 A, Wavelength=230 nm

| Peak # | RetTime [min] | Type | Width [min] | Area mAU*s | Height [mAU] | Area %  |
|--------|---------------|------|-------------|------------|--------------|---------|
| 1      | 7.914         | VB   | 0.2131      | 779.67450  | 56.61899     | 6.0315  |
| 2      | 9.794         | BB   | 0.2952      | 1.21470e4  | 629.07007    | 93.9685 |

Totals : 1.29267e4 685.68906

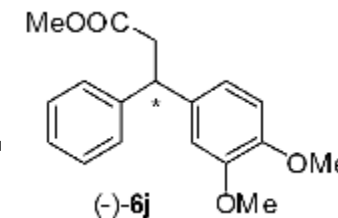

Instrument 1 2/26/2012 6:47:31 PM WJ

Page 1 of 1

Data File C:\HPCHEM\3\DATA\XF\XF000417.D  
 Sample Name: xf-4-88A (Raceme)

=====  
 Acq. Operator :  
 Acq. Instrument : 1100 Location : Vial 1  
 Injection Date : 2/4/2012 4:30:59 PM  
 Acq. Method : C:\HPCHEM\3\METHODS\DEF\_LC.M  
 Last changed : 2/4/2012 4:18:52 PM  
 (modified after loading)  
 Analysis Method : C:\HPCHEM\3\METHODS\DEF\_LC.M  
 Last changed : 2/26/2012 9:35:13 PM  
 (modified after loading)  
 Sample Info : Hexane/iPrOH=90/10, 1.0mL/min(44bar), 230nm, 25 C, OD-H

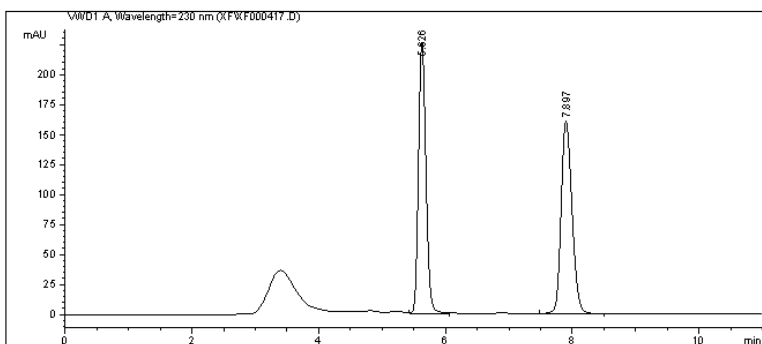

=====  
 Area Percent Report  
 =====

Sorted By : Signal  
 Multiplier : 1.0000  
 Dilution : 1.0000  
 Use Multiplier & Dilution Factor with ISTDs

Signal 1: VWD1 A, Wavelength=230 nm

| Peak # | RetTime [min] | Type | Width [min] | Area mAU *s | Height [mAU] | Area %  |
|--------|---------------|------|-------------|-------------|--------------|---------|
| 1      | 5.626         | VB   | 0.1274      | 1845.30627  | 225.70041    | 49.1215 |
| 2      | 7.897         | VB   | 0.1854      | 1911.30884  | 160.59164    | 50.8785 |

Totals : 3756.61511 386.29205

=====  
 \*\*\* End of Report \*\*\*

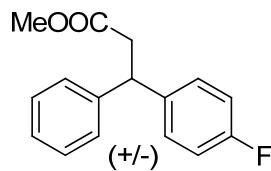

1100 2/26/2012 9:35:19 PM

Page 1 of 1

Data File C:\HPCHEM\3\DATA\XF\XF000418.D  
 Sample Name: xf-4-88A

=====  
 Acq. Operator :  
 Acq. Instrument : 1100 Location : Vial 1  
 Injection Date : 2/4/2012 4:47:51 PM  
 Acq. Method : C:\HPCHEM\3\METHODS\DEF\_LC.M  
 Last changed : 2/4/2012 4:45:42 PM  
 (modified after loading)  
 Analysis Method : C:\HPCHEM\3\METHODS\DEF\_LC.M  
 Last changed : 2/26/2012 7:16:19 PM  
 (modified after loading)  
 Sample Info : Hexane/iPrOH=90/10, 1.0mL/min(44bar), 230nm, 25 C, OD-H

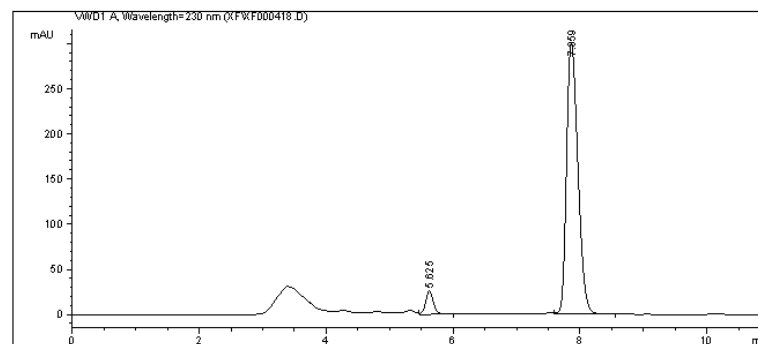

=====  
 Area Percent Report  
 =====

Sorted By : Signal  
 Multiplier : 1.0000  
 Dilution : 1.0000  
 Use Multiplier & Dilution Factor with ISTDs

Signal 1: VWD1 A, Wavelength=230 nm

| Peak # | RetTime [min] | Type | Width [min] | Area mAU *s | Height [mAU] | Area %  |
|--------|---------------|------|-------------|-------------|--------------|---------|
| 1      | 5.625         | VB   | 0.1314      | 223.84001   | 25.88853     | 5.6473  |
| 2      | 7.859         | VB   | 0.1945      | 3739.83643  | 300.88116    | 94.3527 |

Totals : 3963.67644 326.76970

=====  
 \*\*\* End of Report \*\*\*

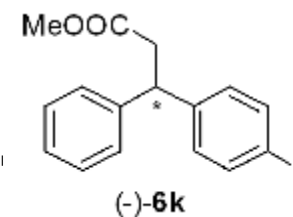

1100 2/26/2012 7:17:10 PM

Page 1 of 1

Data File C:\HPCHEM\3\DATA\XF\XF000424.D  
 Sample Name: xf-4-89A (Raceme)

=====  
 Acq. Operator :  
 Acq. Instrument : 1100 Location : Vial 1  
 Injection Date : 2/6/2012 2:41:18 PM  
 Acq. Method : C:\HPCHEM\3\METHODS\DEF\_LC.M  
 Last changed : 2/6/2012 2:04:54 PM  
 (modified after loading)  
 Analysis Method : C:\HPCHEM\3\METHODS\DEF\_LC.M  
 Last changed : 2/26/2012 7:28:01 PM  
 (modified after loading)  
 Sample Info : Hexane/iPrOH=90/10, 1.0mL/min(44bar), 230nm, 25 C, OD-H

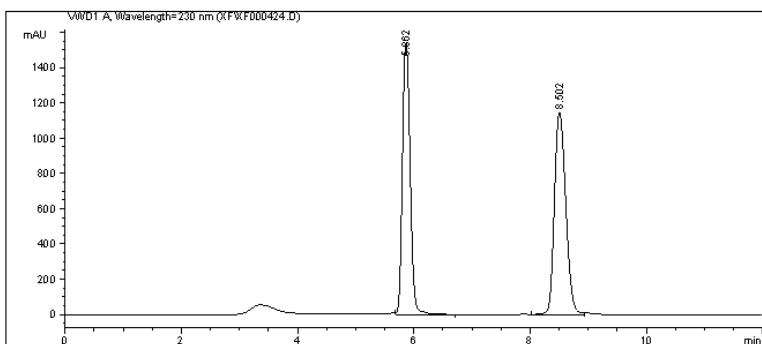

=====  
 Area Percent Report  
 =====

Sorted By : Signal  
 Multiplier : 1.0000  
 Dilution : 1.0000  
 Use Multiplier & Dilution Factor with ISTDs

Signal 1: VWD1 A, Wavelength=230 nm

| Peak # | RetTime [min] | Type | Width [min] | Area mAU *s | Height [mAU] | Area %  |
|--------|---------------|------|-------------|-------------|--------------|---------|
| 1      | 5.862         | VB   | 0.1474      | 1.42860e4   | 1541.91345   | 47.8798 |
| 2      | 8.502         | VV   | 0.2152      | 1.55513e4   | 1145.51611   | 52.1202 |

Totals : 2.98373e4 2687.42957

=====  
 \*\*\* End of Report \*\*\*

1100 2/26/2012 7:28:05 PM

Page 1 of 1

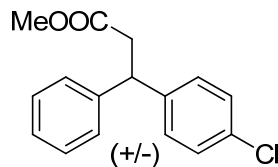

Data File C:\HPCHEM\3\DATA\XF\XF000425.D  
 Sample Name: xf-4-89A

=====  
 Acq. Operator :  
 Acq. Instrument : 1100 Location : Vial 1  
 Injection Date : 2/6/2012 2:59:52 PM  
 Acq. Method : C:\HPCHEM\3\METHODS\DEF\_LC.M  
 Last changed : 2/6/2012 2:57:50 PM  
 (modified after loading)  
 Analysis Method : C:\HPCHEM\3\METHODS\DEF\_LC.M  
 Last changed : 2/26/2012 7:28:37 PM  
 (modified after loading)  
 Sample Info : Hexane/iPrOH=90/10, 1.0mL/min(44bar), 230nm, 25 C, OD-H

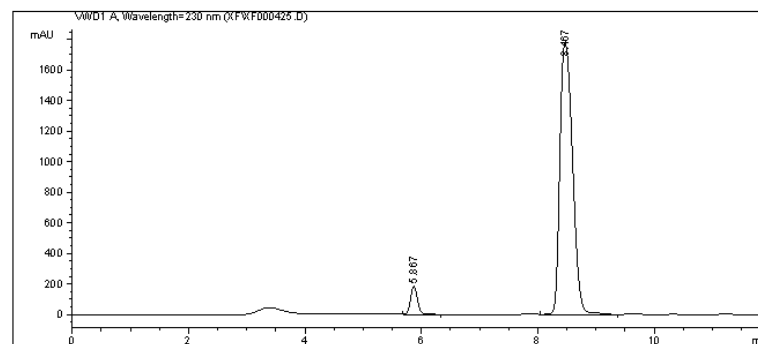

=====  
 Area Percent Report  
 =====

Sorted By : Signal  
 Multiplier : 1.0000  
 Dilution : 1.0000  
 Use Multiplier & Dilution Factor with ISTDs

Signal 1: VWD1 A, Wavelength=230 nm

| Peak # | RetTime [min] | Type | Width [min] | Area mAU *s | Height [mAU] | Area %  |
|--------|---------------|------|-------------|-------------|--------------|---------|
| 1      | 5.867         | VB   | 0.1272      | 1526.31738  | 184.31337    | 5.3793  |
| 2      | 8.467         | VV   | 0.2446      | 2.68475e4   | 1778.35779   | 94.6207 |

Totals : 2.83739e4 1962.67116

=====  
 \*\*\* End of Report \*\*\*

1100 2/26/2012 7:28:41 PM

Page 1 of 1

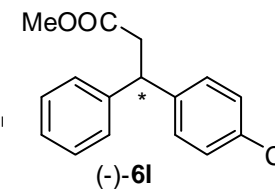



Data File C:\HPCHEM\3\DATA\XF\XF000426.D  
 Sample Name: xf-4-89B(Raceme)

=====  
 Acq. Operator :  
 Acq. Instrument : 1100 Location : Vial 1  
 Injection Date : 2/6/2012 3:17:54 PM  
 Acq. Method : C:\HPCHEM\3\METHODS\DEF\_LC.M  
 Last changed : 2/6/2012 3:15:55 PM  
 (modified after loading)  
 Analysis Method : C:\HPCHEM\3\METHODS\DEF\_LC.M  
 Last changed : 2/26/2012 7:29:45 PM  
 (modified after loading)  
 Sample Info : Hexane/iPrOH=90/10, 1.0mL/min(44bar), 230nm, 25 C, OD-H

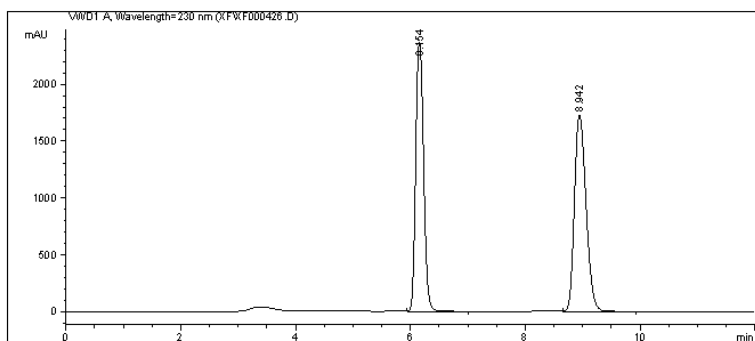

=====  
 Area Percent Report  
 =====

Sorted By : Signal  
 Multiplier : 1.0000  
 Dilution : 1.0000  
 Use Multiplier & Dilution Factor with ISTDs

Signal 1: VWD1 A, Wavelength=230 nm

| Peak # | RetTime [min] | Type | Width [min] | Area mAU  | %s | Height [mAU] | Area %  |
|--------|---------------|------|-------------|-----------|----|--------------|---------|
| 1      | 6.154         | VV   | 0.1528      | 2.27335e4 |    | 2368.22705   | 48.2893 |
| 2      | 8.942         | VB   | 0.2193      | 2.43441e4 |    | 1732.53528   | 51.7107 |

Totals : 4.70776e4 4100.76233

=====  
 \*\*\* End of Report \*\*\*

1100 2/26/2012 7:29:51 PM

Page 1 of 1

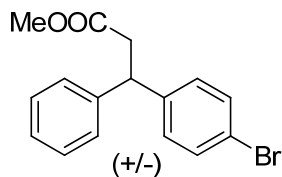

Data File C:\HPCHEM\3\DATA\XF\XF000427.D  
 Sample Name: xf-4-89B

=====  
 Acq. Operator :  
 Acq. Instrument : 1100 Location : Vial 1  
 Injection Date : 2/6/2012 3:40:18 PM  
 Acq. Method : C:\HPCHEM\3\METHODS\DEF\_LC.M  
 Last changed : 2/6/2012 3:38:19 PM  
 (modified after loading)  
 Analysis Method : C:\HPCHEM\3\METHODS\DEF\_LC.M  
 Last changed : 2/26/2012 7:30:25 PM  
 (modified after loading)  
 Sample Info : Hexane/iPrOH=90/10, 1.0mL/min(44bar), 230nm, 25 C, OD-H

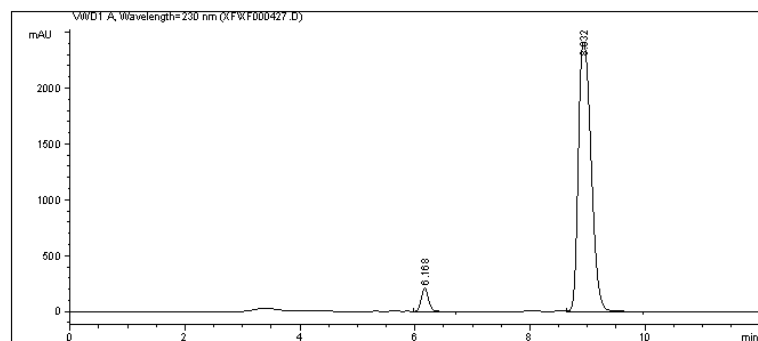

=====  
 Area Percent Report  
 =====

Sorted By : Signal  
 Multiplier : 1.0000  
 Dilution : 1.0000  
 Use Multiplier & Dilution Factor with ISTDs

Signal 1: VWD1 A, Wavelength=230 nm

| Peak # | RetTime [min] | Type | Width [min] | Area mAU   | %s | Height [mAU] | Area %  |
|--------|---------------|------|-------------|------------|----|--------------|---------|
| 1      | 6.168         | VB   | 0.1362      | 1841.03748 |    | 209.07806    | 4.7213  |
| 2      | 8.932         | VB   | 0.2455      | 3.71533e4  |    | 2408.64844   | 95.2787 |

Totals : 3.89943e4 2617.72650

=====  
 \*\*\* End of Report \*\*\*

1100 2/26/2012 7:30:30 PM

Page 1 of 1

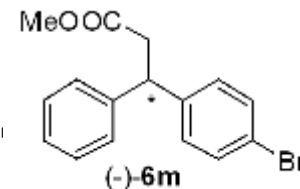

Data File C:\HPCHEM\3\DATA\XF\F000419.D  
 Sample Name: xf-4-86B (Raceme)

=====  
 Acq. Operator :  
 Acq. Instrument : 1100 Location : Vial 1  
 Injection Date : 2/4/2012 5:08:06 PM  
 Acq. Method : C:\HPCHEM\3\METHODS\DEF\_LC.M  
 Last changed : 2/4/2012 5:16:14 PM  
 (modified after loading)  
 Analysis Method : C:\HPCHEM\3\METHODS\DEF\_LC.M  
 Last changed : 2/26/2012 7:16:19 PM  
 (modified after loading)  
 Sample Info : Hexane/iPrOH=90/10, 1.0mL/min(44bar), 230nm, 25 C, OD-H  
 =====

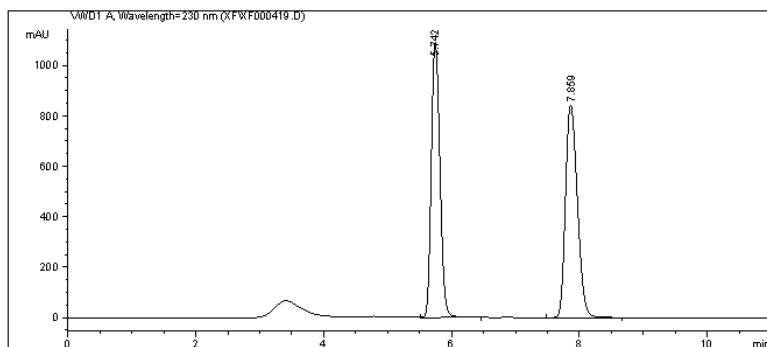

=====  
 Area Percent Report  
 =====

Sorted By : Signal  
 Multiplier : 1.0000  
 Dilution : 1.0000  
 Use Multiplier & Dilution Factor with ISTDs

Signal 1: WVD1 A, Wavelength=230 nm

| Peak # | RetTime [min] | Type | Width [min] | Area mAU  | Area %  | Height [mAU] | Area %  |
|--------|---------------|------|-------------|-----------|---------|--------------|---------|
| 1      | 5.742         | VB   | 0.1490      | 1.02575e4 | 48.5485 | 1090.78735   | 51.4515 |
| 2      | 7.859         | VB   | 0.2028      | 1.08709e4 | 51.4515 | 843.27802    | 51.4515 |

Totals : 2.11284e4 1934.06537

=====  
 \*\*\* End of Report \*\*\*

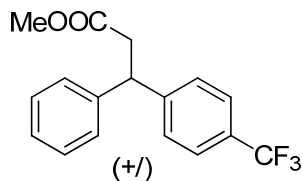

1100 2/26/2012 7:26:30 PM

Page 1 of 1

Data File C:\HPCHEM\3\DATA\XF\F000423.D  
 Sample Name: xf-4-86B

=====  
 Acq. Operator :  
 Acq. Instrument : 1100 Location : Vial 1  
 Injection Date : 2/4/2012 8:22:01 PM  
 Acq. Method : C:\HPCHEM\3\METHODS\DEF\_LC.M  
 Last changed : 2/4/2012 7:49:25 PM  
 (modified after loading)  
 Analysis Method : C:\HPCHEM\3\METHODS\DEF\_LC.M  
 Last changed : 2/26/2012 7:16:19 PM  
 (modified after loading)  
 Sample Info : Hexane/iPrOH=90/10, 1.0mL/min(44bar), 230nm, 25 C, OD-H  
 =====

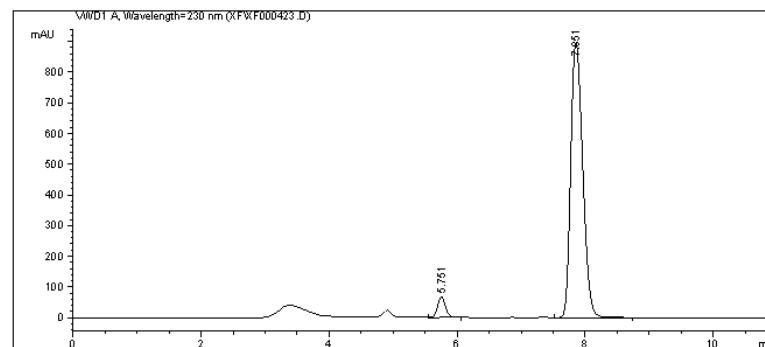

=====  
 Area Percent Report  
 =====

Sorted By : Signal  
 Multiplier : 1.0000  
 Dilution : 1.0000  
 Use Multiplier & Dilution Factor with ISTDs

Signal 1: WVD1 A, Wavelength=230 nm

| Peak # | RetTime [min] | Type | Width [min] | Area mAU  | Area %  | Height [mAU] | Area %  |
|--------|---------------|------|-------------|-----------|---------|--------------|---------|
| 1      | 5.751         | VB   | 0.1304      | 570.75714 | 4.6802  | 67.66550     | 4.6802  |
| 2      | 7.851         | VB   | 0.2052      | 1.16244e4 | 95.3198 | 896.47772    | 95.3198 |

Totals : 1.21952e4 964.14323

=====  
 \*\*\* End of Report \*\*\*

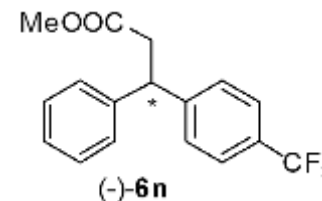

1100 2/26/2012 7:26:53 PM

Page 1 of 1

Data File C:\CHEM32\1\DATA\WJ\XF40 2012-02-25 13-37-11\WJ000258.D  
 Sample Name: XF-4-91A(R)

=====  
 Acq. Operator : WJ Seq. Line : 1  
 Acq. Instrument : Instrument 1 Location : Vial 41  
 Injection Date : 2/25/2012 1:38:29 PM Inj : 1  
 Inj Volume : 5 µl  
 Acq. Method : C:\Chem32\1\DATA\WJ\XF40 2012-02-25 13-37-11\XF40.M  
 Last changed : 2/25/2012 1:37:32 PM by WJ  
 (modified after loading)  
 Analysis Method : C:\CHEM32\1\METHODS\XF40.M  
 Last changed : 2/26/2012 6:37:29 PM by WJ  
 (modified after loading)  
 Sample Info : Hexane/i-PrOH=95/5, 1.0ml/min, 25C 230nm AD-H

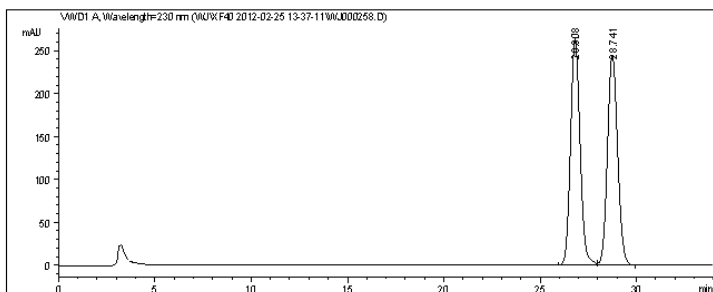

=====  
 Area Percent Report  
 =====

Sorted By : Signal  
 Multiplier : 1.0000  
 Dilution : 1.0000  
 Use Multiplier & Dilution Factor with ISTDs

Signal 1: WJ01 A, Wavelength=230 nm

| Peak # | RetTime [min] | Type | Width [min] | Area mAU   | %s        | Height [mAU] | Area % |
|--------|---------------|------|-------------|------------|-----------|--------------|--------|
| 1      | 26.808        | BV   | 0.5343      | 9078.05664 | 263.60324 | 50.3279      |        |
| 2      | 28.741        | VB   | 0.5701      | 8959.75488 | 244.53838 | 49.6721      |        |

Totals : 1.80378e4 508.14162

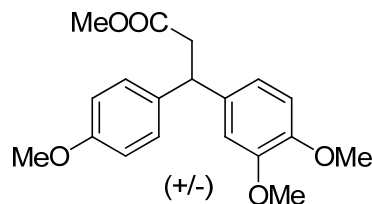

Data File C:\CHEM32\1\DATA\WJ\XF40 2012-02-25 13-37-11\WJ000259.D  
 Sample Name: XF-4-91A

=====  
 Acq. Operator : WJ Seq. Line : 2  
 Acq. Instrument : Instrument 1 Location : Vial 42  
 Injection Date : 2/25/2012 2:20:47 PM Inj : 1  
 Inj Volume : 5 µl  
 Acq. Method : C:\Chem32\1\DATA\WJ\XF40 2012-02-25 13-37-11\XF40.M  
 Last changed : 2/25/2012 2:19:30 PM by WJ  
 (modified after loading)  
 Analysis Method : C:\CHEM32\1\METHODS\XF40.M  
 Last changed : 2/26/2012 6:38:21 PM by WJ  
 (modified after loading)  
 Sample Info : Hexane/i-PrOH=95/5, 1.0ml/min, 25C 230nm AD-H

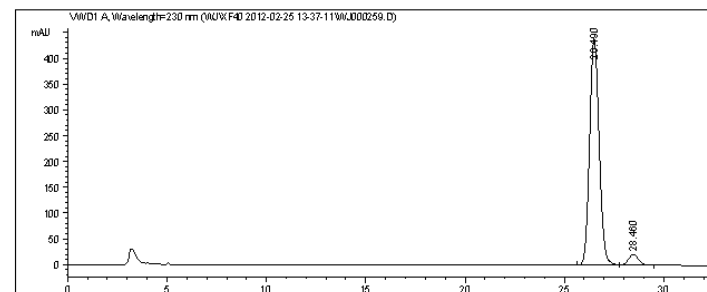

=====  
 Area Percent Report  
 =====

Sorted By : Signal  
 Multiplier : 1.0000  
 Dilution : 1.0000  
 Use Multiplier & Dilution Factor with ISTDs

Signal 1: WJ01 A, Wavelength=230 nm

| Peak # | RetTime [min] | Type | Width [min] | Area mAU  | %s        | Height [mAU] | Area % |
|--------|---------------|------|-------------|-----------|-----------|--------------|--------|
| 1      | 26.490        | BV   | 0.5220      | 1.46964e4 | 438.49945 | 95.1655      |        |
| 2      | 28.460        | VB   | 0.5563      | 746.59552 | 20.91420  | 4.8345       |        |

Totals : 1.54429e4 459.41365

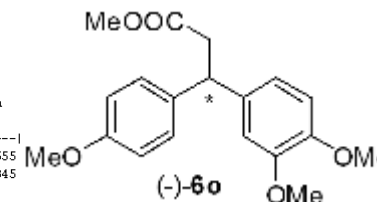

Data File C:\CHEM32\1\DATA\WJ\XF40 2012-02-25 10-18-37\WJ000258.D  
 Sample Name: XF-4-92A(R)

```

=====
Acq. Operator   : WJ                      Seq. Line : 1
Acq. Instrument : Instrument 1             Location  : Vial 31
Injection Date  : 2/25/2012 10:19:54 AM   Inj       : 1
                                           Inj Volume: 5 µl
Acq. Method     : C:\Chem32\1\DATA\WJ\XF40 2012-02-25 10-18-37\XF40.M
Last changed    : 2/25/2012 10:18:34 AM by WJ
Analysis Method : C:\CHEM32\1\METHODS\XF40.M
Last changed    : 2/26/2012 6:43:32 PM by WJ
                                           (modified after loading)
Sample Info     : Hexane/i-PrOH=95/5, 1.0ml/min, 25C 230nm OD-H
    
```

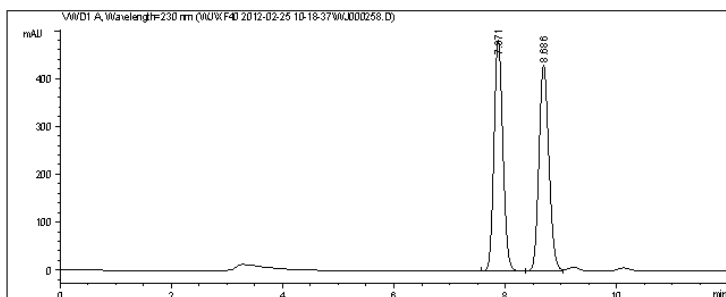

Area Percent Report

```

=====
Sorted By      : Signal
Multiplier     : 1.0000
Dilution      : 1.0000
Use Multiplier & Dilution Factor with ISTDs
    
```

Signal 1: WVD1 A, Wavelength=230 nm

| Peak # | RetTime [min] | Type | Width [min] | Area mAU   | Height *s [mAU] | Area %  |
|--------|---------------|------|-------------|------------|-----------------|---------|
| 1      | 7.871         | BV   | 0.1731      | 5348.44531 | 482.12042       | 50.0143 |
| 2      | 8.686         | VV   | 0.1933      | 5345.38330 | 429.32727       | 49.9857 |

Totals : 1.06938e4 911.44769

\*\*\* End of Report \*\*\*

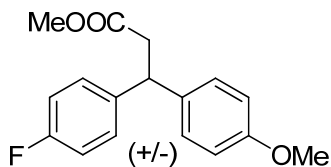

Data File C:\CHEM32\1\DATA\WJ\XF40 2012-02-25 10-18-37\WJ000259.D  
 Sample Name: XF-4-92A

```

=====
Acq. Operator   : WJ                      Seq. Line : 2
Acq. Instrument : Instrument 1             Location  : Vial 32
Injection Date  : 2/25/2012 10:39:22 AM   Inj       : 1
                                           Inj Volume: 5 µl
Acq. Method     : C:\Chem32\1\DATA\WJ\XF40 2012-02-25 10-18-37\XF40.M
Last changed    : 2/25/2012 10:18:34 AM by WJ
Analysis Method : C:\CHEM32\1\METHODS\XF40.M
Last changed    : 2/26/2012 6:43:32 PM by WJ
                                           (modified after loading)
Sample Info     : Hexane/i-PrOH=95/5, 1.0ml/min, 25C 230nm OD-H
    
```

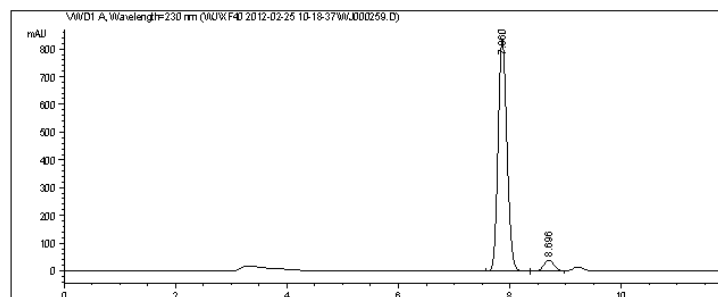

Area Percent Report

```

=====
Sorted By      : Signal
Multiplier     : 1.0000
Dilution      : 1.0000
Use Multiplier & Dilution Factor with ISTDs
    
```

Signal 1: WVD1 A, Wavelength=230 nm

| Peak # | RetTime [min] | Type | Width [min] | Area mAU   | Height *s [mAU] | Area %  |
|--------|---------------|------|-------------|------------|-----------------|---------|
| 1      | 7.860         | VV   | 0.1739      | 9294.36035 | 832.81836       | 94.7562 |
| 2      | 8.696         | VV   | 0.1984      | 514.35309  | 39.90719        | 5.2438  |

Totals : 9808.71344 872.72555

\*\*\* End of Report \*\*\*

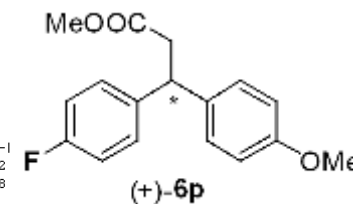

Data File C:\CHEM32\1\DATA\WJ\XF40 2012-02-26 14-15-26\WJ000259.D  
 Sample Name: XF-4-92B

```
=====
Acq. Operator   : WJ                      Seq. Line :    2
Acq. Instrument : Instrument 1             Location  : Vial 32
Injection Date  : 2/26/2012 2:33:31 PM    Inj       :    1
                                           Inj Volume: 5 µl

Acq. Method    : C:\Chem32\1\DATA\WJ\XF40 2012-02-26 14-15-26\XF40.M
Last changed   : 2/26/2012 2:15:21 PM by WJ
Analysis Method : C:\CHEM32\1\METHODS\XF40.M
Last changed   : 2/26/2012 6:49:35 PM by WJ
                (modified after loading)
Sample Info    : Hexane/1-PrOH=95/5, 1.0ml/min, 25C 230nm AD-H
=====
```

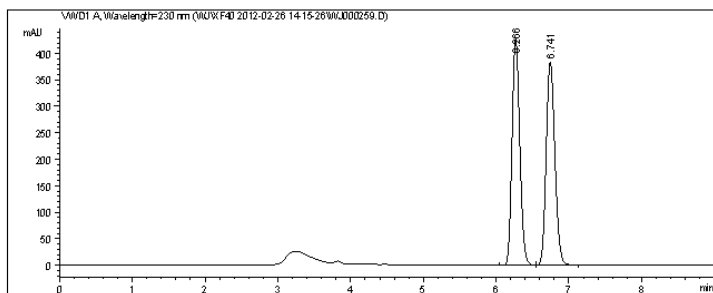

Area Percent Report

```
Sorted By      : Signal
Multiplier     : 1.0000
Dilution       : 1.0000
Use Multiplier & Dilution Factor with ISTDs
```

Signal 1: WVD1 A, Wavelength=230 nm

| Peak # | RetTime [min] | Type | Width [min] | Area mAU   | Area %  | Height [mAU] | Area %  |
|--------|---------------|------|-------------|------------|---------|--------------|---------|
| 1      | 6.266         | BV   | 0.1155      | 3168.68091 | 49.7099 | 427.85803    | 49.7099 |
| 2      | 6.741         | VV   | 0.1308      | 3205.66626 | 50.2901 | 384.50861    | 50.2901 |

Totals : 6374.34717 812.36664

\*\*\* End of Report \*\*\*

Instrument 1 2/26/2012 6:49:37 PM WJ

Page 1 of 1

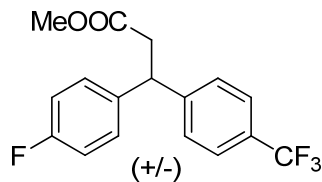

Data File C:\CHEM32\1\DATA\WJ\XF40 2012-02-26 14-15-26\WJ000258.D  
 Sample Name: XF4-92B(R)

```
=====
Acq. Operator   : WJ                      Seq. Line :    1
Acq. Instrument : Instrument 1             Location  : Vial 31
Injection Date  : 2/26/2012 2:16:40 PM    Inj       :    1
                                           Inj Volume: 5 µl

Acq. Method    : C:\Chem32\1\DATA\WJ\XF40 2012-02-26 14-15-26\XF40.M
Last changed   : 2/26/2012 2:15:21 PM by WJ
Analysis Method : C:\CHEM32\1\METHODS\XF40.M
Last changed   : 2/26/2012 6:49:35 PM by WJ
                (modified after loading)
Sample Info    : Hexane/1-PrOH=95/5, 1.0ml/min, 25C 230nm AD-H
=====
```

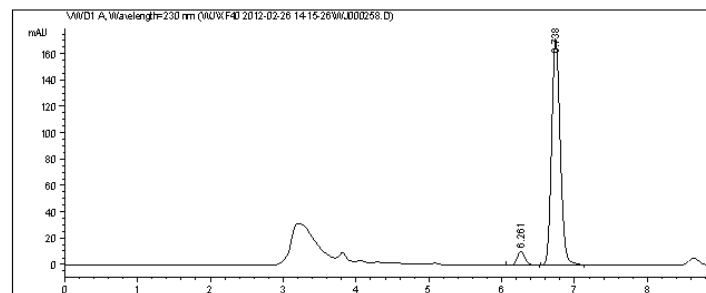

Area Percent Report

```
Sorted By      : Signal
Multiplier     : 1.0000
Dilution       : 1.0000
Use Multiplier & Dilution Factor with ISTDs
```

Signal 1: WVD1 A, Wavelength=230 nm

| Peak # | RetTime [min] | Type | Width [min] | Area mAU   | Area %  | Height [mAU] | Area %  |
|--------|---------------|------|-------------|------------|---------|--------------|---------|
| 1      | 6.261         | BB   | 0.1125      | 76.11201   | 5.0995  | 10.47010     | 5.0995  |
| 2      | 6.738         | BV   | 0.1282      | 1416.41541 | 94.9005 | 171.85339    | 94.9005 |

Totals : 1492.52742 182.32349

\*\*\* End of Report \*\*\*

Instrument 1 2/26/2012 6:49:55 PM WJ

Page 1 of 1

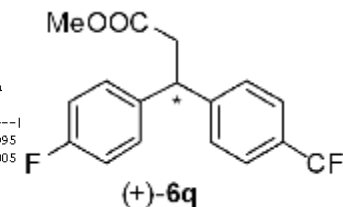

Supplement: c3ob41342j.pdf [file c3ob41342j.pdf]
